# Supplementary material for: Deciphering the shared mechanisms of Gegen Qinlian Decoction in treating type 2 diabetes and ulcerative colitis via bioinformatics and machine learning
Source: Frontiers journal article supplement (doi:10.3389/fmed.2024.1406149), 2024-06-19
Supplement: Presentation_1.zip [file Presentation_1.zip]

## Sheet: Sheet1
DEGs for UC
	logFC	ABS	AveExpr	t	P.Value	adj.P.Val	B
SLC6A14	4.72117	4.72117	7.55567	6.26708	2.65e-06	0.00030246	4.82779
AQP8	-3.94456	3.94456	8.7658	-4.84161	7.77e-05	0.00195124	1.574
ABCG2	-3.33459	3.33459	7.44338	-5.56352	1.37e-05	0.000712855	3.24541
VNN1	3.23146	3.23146	6.73014	4.89442	6.84e-05	0.00179048	1.69734
DUOX2	3.02216	3.02216	8.95357	3.19777	0.00416049	0.0242485	-2.22199
HMGCS2	-2.96517	2.96517	10.095	-3.95651	0.000672491	0.00721521	-0.49603
MEP1B	-2.7827	2.7827	6.34075	-4.50586	0.000176046	0.00311025	0.787881
INSL5	2.72432	2.72432	7.34697	4.57571	0.000148468	0.00282253	0.951593
MMP3	2.68414	2.68414	6.11042	3.30237	0.00324948	0.0205488	-1.98994
LCN2	2.63628	2.63628	9.61291	4.44588	0.000203793	0.0034393	0.647317
SLC26A2	-2.61467	2.61467	10.4352	-3.75267	0.00110315	0.0100171	-0.967677
TMIGD1	-2.58163	2.58163	8.40417	-4.59642	0.000141158	0.0027461	1.00012
TNIP3	2.56895	2.56895	6.35918	3.34994	0.00290241	0.0190572	-1.88363
SLC30A10	-2.56614	2.56614	7.90853	-5.87966	6.5e-06	0.000469072	3.96333
SLC38A4	-2.5559	2.5559	5.57364	-6.071	4.16e-06	0.000377355	4.39251
DUOXA2	2.54718	2.54718	7.7082	3.00684	0.00649956	0.0329533	-2.63865
SLC17A4	-2.46163	2.46163	7.82546	-6.78236	8.24e-07	0.000172495	5.9478
B4GALNT2	-2.46051	2.46051	7.93588	-5.16817	3.53e-05	0.00121839	2.33452
MMP7	2.42888	2.42888	5.69811	3.12062	0.00498642	0.0274858	-2.39149
ANPEP	-2.4248	2.4248	10.29	-4.77865	9.06e-05	0.00212119	1.4268
IDO1	2.41392	2.41392	6.39153	3.01255	0.0064141	0.0326103	-2.62633
SERPINB5	2.40326	2.40326	6.67398	4.09204	0.000483375	0.00584715	-0.180505
S100A8	2.38912	2.38912	6.2841	3.21076	0.00403514	0.0238345	-2.19331
IL1B	2.38071	2.38071	6.75238	4.36982	0.000245374	0.00383545	0.46909
BMP3	-2.36334	2.36334	7.8361	-4.30546	0.000287126	0.00422861	0.318362
OTOP2	-2.34005	2.34005	8.92392	-4.06338	0.000518362	0.00609965	-0.247332
PI3	2.3278	2.3278	8.57313	4.5118	0.000173513	0.00308523	0.801805
CHI3L1	2.32111	2.32111	6.77071	2.96459	0.00716691	0.0352842	-2.72952
MMP1	2.2943	2.2943	6.88216	3.02044	0.00629777	0.0322169	-2.6093
UGT2A3	-2.26742	2.26742	7.34385	-3.33254	0.00302494	0.0195754	-1.92257
OLFM4	2.25645	2.25645	11.4699	4.18827	0.000382222	0.00504924	0.0442107
PRKG2	-2.25207	2.25207	5.73098	-4.82043	8.18e-05	0.00200355	1.52449
ABCA12	2.22709	2.22709	5.66239	3.22413	0.00390999	0.0232882	-2.16376
REG1A	2.18871	2.18871	6.74432	2.28081	0.0326225	0.0998322	-4.11134
CYP2B6	-2.18693	2.18693	7.86555	-3.511	0.00197547	0.014872	-1.52044
NOS2	2.18069	2.18069	8.80454	3.39586	0.00260174	0.0177187	-1.78056
GUCA2A	-2.10665	2.10665	10.6816	-3.96773	0.000654371	0.00710573	-0.469953
CDH3	2.1048	2.1048	6.65819	4.53014	0.00016592	0.00301326	0.844791
NR4A2	2.1012	2.1012	7.19006	4.73322	0.000101164	0.00227269	1.32049
AQP9	2.08614	2.08614	5.67802	3.15548	0.00459532	0.0260374	-2.31509
CLCA4	-2.07649	2.07649	11.0525	-3.53958	0.0018445	0.0142037	-1.45552
CXCL1	2.07351	2.07351	8.23408	3.70709	0.00123177	0.01079	-1.07253
CYP2B7P	-2.05824	2.05824	6.83439	-4.10684	0.000466238	0.00573529	-0.145975
MS4A12	-2.01325	2.01325	11.023	-6.49057	1.59e-06	0.000225105	5.31794
SAA2	1.99201	1.99201	5.58021	2.4416	0.0231416	0.0784891	-3.80373
REG4	1.97482	1.97482	8.48555	3.96847	0.000653193	0.00709703	-0.468233
CHP2	-1.96554	1.96554	8.66945	-3.63248	0.00147493	0.0121574	-1.2436
MIR215	-1.95383	1.95383	5.07376	-4.85407	7.54e-05	0.00191607	1.60311
SLC16A1	-1.9467	1.9467	7.73268	-6.54609	1.4e-06	0.000223812	5.43868
ABCB1	-1.9261	1.9261	7.89595	-4.844	7.73e-05	0.00194772	1.57959
CXCL11	1.91844	1.91844	5.88523	3.21471	0.00399772	0.0236761	-2.18457
IL1RN	1.91578	1.91578	6.27033	5.15053	3.68e-05	0.00125169	2.29359
BRINP3	-1.85785	1.85785	5.81595	-4.80844	8.43e-05	0.00203058	1.49647
TCN1	1.84995	1.84995	5.66662	3.01088	0.00643901	0.0326998	-2.62994
PHLPP2	-1.8467	1.8467	8.91342	-6.39842	1.96e-06	0.000251316	5.11661
REG1B	1.83504	1.83504	5.27538	2.16897	0.0411886	0.118214	-4.31778
CR2	1.81366	1.81366	6.07705	2.49571	0.0205747	0.0723338	-3.69754
SNORA23	1.81028	1.81028	10.9291	8.0146	5.8e-08	4.05e-05	8.47264
C3	1.78658	1.78658	8.98379	3.35002	0.00290182	0.0190572	-1.88344
CPB1	1.78456	1.78456	5.80438	3.84949	0.00087232	0.00847198	-0.744168
FSIP2	-1.77265	1.77265	7.47437	-6.87817	6.65e-07	0.000151423	6.15205
SLC51A	-1.7594	1.7594	6.86441	-4.20528	0.000366678	0.00490927	0.0839744
FDCSP	1.75291	1.75291	6.53941	2.64688	0.0147421	0.0573728	-3.39433
CXCL8	1.74981	1.74981	6.57662	3.28708	0.00336936	0.0210666	-2.02401
NHERF4	-1.74728	1.74728	6.74377	-8.64943	1.6e-08	2.32e-05	9.68512
CCL20	1.7452	1.7452	7.39422	3.2296	0.00385985	0.0230844	-2.15165
TIMP1	1.74377	1.74377	9.77578	4.79889	8.62e-05	0.00205253	1.47413
DAPP1	1.73526	1.73526	6.42452	5.28618	2.66e-05	0.00104805	2.60774
CD79A	1.73171	1.73171	8.80388	3.09804	0.00525679	0.0284513	-2.44082
STEAP4	1.73106	1.73106	5.90192	4.1839	0.000386324	0.00508088	0.0339883
PCK1	-1.71233	1.71233	9.1446	-2.55631	0.0180165	0.0658706	-3.57713
PBLD	-1.7075	1.7075	8.06281	-5.35141	2.27e-05	0.000954322	2.7583
PTGS2	1.69819	1.69819	6.36894	3.86317	0.000843819	0.00828912	-0.71251
SERPINB3	1.68854	1.68854	4.8267	2.35667	0.0277754	0.0890313	-3.96774
BGN	1.68162	1.68162	8.21805	3.82224	0.000931957	0.00884608	-0.807167
EGR1	1.67687	1.67687	9.01418	4.58365	0.000145622	0.00278976	0.970197
SLC51B	-1.67416	1.67416	8.82244	-6.73647	9.13e-07	0.000183747	5.84951
SLC7A11	1.67039	1.67039	6.90784	3.61085	0.00155389	0.0125989	-1.29307
MIR194-1	-1.66447	1.66447	5.16672	-4.5357	0.000163686	0.00298708	0.857816
TMEM63C	-1.66216	1.66216	6.41506	-5.14644	3.72e-05	0.00125174	2.28411
KCND3	1.66176	1.66176	6.51145	4.28276	0.000303491	0.00435728	0.265215
TGM2	1.6603	1.6603	9.27076	4.33618	0.000266378	0.00405393	0.390298
AKR1B10	-1.64804	1.64804	8.67693	-5.27725	2.72e-05	0.00105679	2.5871
GREM1	1.64076	1.64076	8.79282	4.44536	0.00020405	0.00344056	0.646105
CXCL13	1.64005	1.64005	6.59778	2.54754	0.0183674	0.0667908	-3.59465
SULT1A2	-1.6301	1.6301	8.03858	-6.00371	4.87e-06	0.000411148	4.24207
TRPM6	-1.62551	1.62551	8.33684	-3.28884	0.00335537	0.021021	-2.0201
MTMR11	-1.62308	1.62308	8.62728	-7.41369	2.06e-07	8.35e-05	7.26937
TRIM29	1.61448	1.61448	7.05586	4.9456	6.04e-05	0.00166972	1.81678
GBA3	-1.61338	1.61338	6.23417	-3.75575	0.00109495	0.00998108	-0.96058
VSIG1	1.59948	1.59948	5.38863	2.73696	0.0120477	0.0499036	-3.2094
GUCA2B	-1.59458	1.59458	9.52783	-4.28374	0.000302766	0.0043538	0.267508
SLC16A9	-1.59149	1.59149	7.46527	-3.75304	0.00110215	0.0100128	-0.966817
S100P	1.58611	1.58611	8.37832	5.87716	6.54e-06	0.000469072	3.95769
ACSF2	-1.5849	1.5849	8.27009	-4.88452	7e-05	0.00180886	1.67423
BEST4	-1.58484	1.58484	8.15971	-3.65885	0.00138403	0.011684	-1.18323
RNU4-2	1.57638	1.57638	9.32764	3.39767	0.00259057	0.0176874	-1.7765
HSD3B2	-1.57488	1.57488	5.30737	-4.03384	0.000557047	0.0063719	-0.316135
SERPINA3	1.56848	1.56848	6.5481	3.51355	0.00196344	0.0148229	-1.51466
KYNU	1.55933	1.55933	5.71392	2.79477	0.0105718	0.0457608	-3.08917
TNC	1.55814	1.55814	7.22238	3.36657	0.00278981	0.0185636	-1.84636
KRT12	-1.55787	1.55787	5.77335	-12.8458	1.09e-11	2.06e-07	16.2978
SCARNA1	1.5577	1.5577	6.69994	6.6281	1.16e-06	0.000207022	5.61627
TMEM236	-1.55253	1.55253	8.90262	-4.57204	0.000149802	0.00284097	0.942994
FN1	1.55212	1.55212	8.77124	4.708	0.000107567	0.00236059	1.26145
PPARGC1A	-1.55183	1.55183	8.33062	-4.81799	8.23e-05	0.00200665	1.51879
HNF1A-AS1	-1.55125	1.55125	8.18613	-3.52456	0.00191223	0.0145644	-1.48965
REG3A	1.5506	1.5506	5.80799	1.67097	0.10892	0.233233	-5.14963
SOCS3	1.54934	1.54934	7.19362	3.87672	0.000816487	0.0081265	-0.681123
CD55	1.54581	1.54581	9.60152	4.15287	0.000416713	0.00533297	-0.0385094
ENPP1	-1.53941	1.53941	8.06227	-5.74428	8.94e-06	0.000545394	3.65717
SLC22A5	-1.53002	1.53002	8.71969	-5.04804	4.71e-05	0.0014311	2.05543
ADGRL2	1.52986	1.52986	7.093	5.64418	1.13e-05	0.000633701	3.42956
CXCL10	1.52983	1.52983	7.01707	1.96042	0.062755	0.158623	-4.68456
PCSK1	1.52732	1.52732	6.57017	3.46769	0.00219148	0.0159319	-1.61855
CFB	1.52712	1.52712	8.74275	3.53053	0.001885	0.0144213	-1.47607
MMP12	1.52666	1.52666	8.07113	2.05654	0.0518053	0.13813	-4.5186
IGFBP5	1.52505	1.52505	8.24621	3.6537	0.00140133	0.0117668	-1.19502
PIM2	1.52391	1.52391	8.04889	3.10567	0.00516396	0.0281471	-2.42418
HOXB13	1.52351	1.52351	8.52017	3.30706	0.00321356	0.0204072	-1.97949
SGK2	-1.51627	1.51627	8.43203	-6.39216	1.99e-06	0.000251511	5.1029
MIER3	-1.513	1.513	9.56172	-7.31832	2.53e-07	9.01e-05	7.07344
CCL2	1.50976	1.50976	8.18186	2.9427	0.00753807	0.0364321	-2.77639
TUBAL3	-1.50742	1.50742	6.70114	-5.26779	2.78e-05	0.00106418	2.56522
CLDN1	1.5007	1.5007	6.82061	3.4328	0.00238219	0.0167858	-1.69737
MUC5B	1.49317	1.49317	9.71515	5.50387	1.58e-05	0.000778645	3.10884
MIR192	-1.49239	1.49239	7.73268	-6.32259	2.33e-06	0.000279862	4.95012
CXCL2	1.49045	1.49045	6.31451	3.57138	0.00170877	0.0134452	-1.38312
MMP9	1.47957	1.47957	7.6127	2.88508	0.00860474	0.039933	-2.89905
TNFAIP6	1.47317	1.47317	5.19231	3.06403	0.00569078	0.0299573	-2.51485
SLC9A3	-1.47247	1.47247	9.04205	-2.51562	0.019699	0.0701814	-3.65814
SELL	1.4715	1.4715	6.93746	2.58889	0.016767	0.0625912	-3.51174
DHRS11	-1.46918	1.46918	10.1993	-4.33138	0.000269515	0.00408083	0.379066
SLC35G1	-1.4662	1.4662	7.46919	-5.72172	9.43e-06	0.00056423	3.60596
SERPINB7	1.46075	1.46075	4.74098	2.73356	0.0121403	0.05021	-3.21643
FABP2	-1.45949	1.45949	8.17742	-3.63052	0.00148194	0.0122045	-1.24809
CXCL9	1.45578	1.45578	6.45252	2.38048	0.0263968	0.0859571	-3.9221
PRRX1	1.4552	1.4552	6.30134	4.54473	0.000160121	0.00294195	0.878978
RPS6KA6	-1.45065	1.45065	7.06978	-4.82991	8e-05	0.00197926	1.54664
FADS2	1.44911	1.44911	7.73297	2.82769	0.00980976	0.0435935	-3.02018
PDE6A	-1.44822	1.44822	5.63523	-5.49697	1.61e-05	0.000788369	3.09301
ITGA5	1.44727	1.44727	7.72772	4.17477	0.000395033	0.0051428	0.0126408
GLDN	1.44501	1.44501	7.04196	3.11227	0.0050848	0.0278402	-2.40974
SLPI	1.44493	1.44493	9.56896	5.1099	4.06e-05	0.00131077	2.19925
NR1H4	-1.42536	1.42536	4.9017	-3.84562	0.000880553	0.00851478	-0.753119
LRRC19	-1.42321	1.42321	8.67698	-4.59549	0.000141478	0.00274949	0.997945
ANKRD40CL	-1.41945	1.41945	7.99121	-6.20998	3.02e-06	0.00032075	4.70151
CROT	-1.41943	1.41943	7.01645	-6.56673	1.34e-06	0.000221095	5.48346
CWH43	-1.41919	1.41919	7.85308	-3.18376	0.00429997	0.0248274	-2.25289
ALPL	1.41407	1.41407	6.66254	3.52969	0.00188881	0.0144388	-1.47799
SNORA20	1.41141	1.41141	9.18164	4.0158	0.000582083	0.00660343	-0.358146
PLCD1	-1.41127	1.41127	8.27553	-5.41449	1.95e-05	0.000881623	2.90357
MS4A1	1.40921	1.40921	7.54152	2.02676	0.0550002	0.144262	-4.57059
CCN1	1.40711	1.40711	6.18496	4.05328	0.000531281	0.00619756	-0.270867
SATB2-AS1	-1.40409	1.40409	6.76343	-5.11456	4.02e-05	0.00130963	2.21008
VCAM1	1.39842	1.39842	6.85363	3.52651	0.00190328	0.0145258	-1.48521
SELE	1.39343	1.39343	5.40923	2.91758	0.00798642	0.0379798	-2.82998
CA1	-1.39306	1.39306	9.61117	-2.59595	0.0165074	0.0619388	-3.49753
CREB3L3	-1.39245	1.39245	6.77068	-3.67274	0.00133839	0.0114215	-1.15139
ETFDH	-1.39037	1.39037	8.12827	-6.44072	1.78e-06	0.000243086	5.20918
CXCR1	1.38925	1.38925	5.26855	2.69381	0.0132743	0.0532867	-3.29836
UBD	1.38823	1.38823	6.26628	3.24725	0.00370231	0.0224629	-2.11254
MIR186	-1.38698	1.38698	5.42946	-5.8661	6.71e-06	0.000470535	3.93276
IRS1	1.38601	1.38601	7.09828	5.88614	6.41e-06	0.000466298	3.97793
HPGD	-1.38461	1.38461	10.2323	-5.26851	2.77e-05	0.00106418	2.56689
PADI2	-1.38245	1.38245	10.2895	-3.19925	0.00414602	0.0242121	-2.21872
PKIB	-1.38064	1.38064	7.52292	-5.70304	9.85e-06	0.000571508	3.56353
CYP3A4	-1.38047	1.38047	5.30713	-2.1278	0.0448244	0.125016	-4.39213
HSD17B2	-1.3674	1.3674	8.61638	-4.03839	0.000550912	0.00633247	-0.305551
RMDN2	-1.36176	1.36176	6.4056	-5.19165	3.34e-05	0.00117512	2.38895
PLA2G2A	1.36019	1.36019	10.7553	3.63811	0.00145506	0.0120357	-1.23073
C2	1.35604	1.35604	7.11543	3.70018	0.00125253	0.0109161	-1.08841
COL12A1	1.35343	1.35343	6.91648	3.64169	0.00144254	0.0119584	-1.22253
IL1A	1.35326	1.35326	5.1846	3.4805	0.00212528	0.015656	-1.58956
DPP10	-1.35056	1.35056	5.65859	-3.89172	0.000787264	0.00796877	-0.646372
S100A12	1.34744	1.34744	5.02892	2.23734	0.0357376	0.106525	-4.19235
CLCA1	-1.34502	1.34502	11.2823	-2.40606	0.0249859	0.0826623	-3.87276
FGFR2	-1.34132	1.34132	7.28862	-5.9011	6.19e-06	0.00045684	4.01162
CLU	1.33997	1.33997	7.4045	3.84479	0.000882323	0.00852083	-0.755032
OSMR	1.33871	1.33871	6.90248	3.03684	0.00606244	0.0313764	-2.57383
NMRAL2P	-1.33859	1.33859	6.76608	-4.63859	0.000127374	0.00258063	1.09891
MXRA5	1.33817	1.33817	7.87485	3.17579	0.00438129	0.0251249	-2.27044
ANO6	1.33084	1.33084	8.09988	5.86294	6.76e-06	0.000471578	3.92563
VNN2	1.32787	1.32787	5.26295	2.62042	0.0156358	0.0596541	-3.44808
ADH1C	-1.32637	1.32637	10.4425	-2.94493	0.00749942	0.0363797	-2.77163
TMEM37	-1.32597	1.32597	9.03249	-4.7792	9.05e-05	0.00212103	1.42807
FOS	1.32447	1.32447	8.30685	2.85284	0.00926308	0.0419755	-2.96722
PHLDA1	1.31771	1.31771	7.40941	4.25789	0.00032249	0.00453026	0.207012
HOXA2	-1.31553	1.31553	6.4518	-7.45984	1.87e-07	8.19e-05	7.36368
PDZK1IP1	1.31187	1.31187	9.27702	4.18723	0.000383198	0.00505858	0.04177
DNAI4	-1.31014	1.31014	6.37702	-5.219	3.12e-05	0.0011456	2.45232
MMRN1	1.30804	1.30804	6.54622	3.59325	0.00162115	0.0129933	-1.33324
TINAG	-1.30577	1.30577	6.81688	-4.63103	0.000129741	0.00260741	1.08121
DRAM1	1.29928	1.29928	7.18914	3.46191	0.002222	0.0160671	-1.63162
SNORA3A	1.29049	1.29049	10.9361	5.90365	6.15e-06	0.000456389	4.01736
SELP	1.28753	1.28753	5.84003	3.08305	0.00544402	0.0290888	-2.47349
XPNPEP2	-1.287	1.287	7.21263	-2.7276	0.0123044	0.05061	-3.22876
SCUBE2	-1.28579	1.28579	6.95629	-4.3401	0.00026384	0.00402725	0.399479
DMBT1	1.28438	1.28438	9.18148	1.73342	0.0970424	0.21499	-5.05396
ANKRD20A8P	-1.28039	1.28039	5.73628	-4.35045	0.000257259	0.00397011	0.423712
THY1	1.27945	1.27945	7.06422	3.38817	0.00264992	0.0179217	-1.79786
BANK1	1.27437	1.27437	6.10753	2.40847	0.0248568	0.0823176	-3.86811
EDNRA	1.2743	1.2743	6.23493	3.67174	0.00134162	0.0114335	-1.15368
ICOS	1.2741	1.2741	5.43132	3.88464	0.000800931	0.00802676	-0.662783
CTSK	1.27237	1.27237	8.09574	3.4123	0.0025017	0.0172916	-1.74357
CYP4F12	-1.26959	1.26959	7.20449	-5.47893	1.68e-05	0.000808184	3.05163
ACOX1	-1.2651	1.2651	9.81532	-5.98119	5.13e-06	0.000421909	4.1916
DQX1	-1.26506	1.26506	7.07035	-5.30648	2.53e-05	0.00101438	2.65463
SLC4A10	-1.26379	1.26379	5.44656	-6.3433	2.22e-06	0.000270339	4.99568
MT1M	-1.2636	1.2636	9.25607	-2.28065	0.0326335	0.0998496	-4.11164
HOXA6	-1.26355	1.26355	7.88537	-5.26274	2.81e-05	0.00107061	2.55355
CDC14A	-1.26141	1.26141	7.72593	-6.30866	2.41e-06	0.000287111	4.91946
AVIL	-1.26088	1.26088	6.78457	-6.61544	1.2e-06	0.000211027	5.5889
PTPRR	-1.25904	1.25904	7.11476	-4.04923	0.000536554	0.00624557	-0.280308
ANGPTL2	1.25677	1.25677	7.42939	3.6691	0.00135021	0.011486	-1.15974
IL33	1.25319	1.25319	5.14979	4.70301	0.000108881	0.00237561	1.24977
MEP1A	-1.2531	1.2531	10.6243	-3.77026	0.00105712	0.0097209	-0.927135
PPP2R3A	-1.25202	1.25202	6.86394	-4.74371	9.86e-05	0.00225544	1.34505
LINC01559	-1.2501	1.2501	9.12668	-4.24651	0.000331573	0.00460611	0.180391
ADAMTS1	1.2485	1.2485	6.35219	4.53595	0.000163585	0.00298708	0.85841
PPARG	-1.2468	1.2468	9.17567	-5.96738	5.3e-06	0.000430548	4.16062
SLC3A1	-1.24649	1.24649	6.63425	-4.50133	0.000178	0.0031301	0.777279
PARP8	1.24499	1.24499	7.44453	4.67444	0.000116724	0.00245303	1.18287
MYO15B	-1.24194	1.24194	9.06578	-6.55072	1.39e-06	0.000223812	5.44873
RGS5	1.23867	1.23867	7.64147	2.79666	0.0105264	0.045638	-3.08521
EMP1	-1.23828	1.23828	9.53997	-3.83215	0.000909818	0.00870608	-0.784268
MFAP5	1.23574	1.23574	6.41815	3.95308	0.000678125	0.00725914	-0.503994
ICAM1	1.23503	1.23503	7.61953	2.96431	0.00717155	0.0352931	-2.73012
SCARNA4	1.23428	1.23428	6.41566	5.47468	1.69e-05	0.000808184	3.04188
CNTFR	-1.232	1.232	7.46972	-3.4583	0.00224128	0.0161693	-1.63978
PAQR5	-1.23075	1.23075	8.00263	-4.68682	0.000113256	0.00241593	1.21188
STS	1.22524	1.22524	8.4099	3.75027	0.00110956	0.010056	-0.973193
CR1	1.22292	1.22292	5.51322	2.75146	0.0116602	0.048876	-3.17936
GCNT2	-1.2221	1.2221	5.7719	-5.45689	1.77e-05	0.000828499	3.00104
RBPMS	1.2215	1.2215	7.53686	5.06467	4.53e-05	0.00139283	2.09412
SLC28A3	1.21862	1.21862	6.32354	4.33948	0.000264241	0.0040301	0.398023
SLC6A20	1.21801	1.21801	6.92811	3.41189	0.00250416	0.0172916	-1.7445
GABRP	1.21695	1.21695	6.35215	3.50304	0.00201356	0.0150704	-1.5385
GNA15	1.21519	1.21519	7.39216	4.92608	6.33e-05	0.00171292	1.77124
HBB	1.20985	1.20985	7.55435	2.52085	0.0194748	0.0697282	-3.64777
CNTN4	-1.20662	1.20662	5.54107	-5.23129	3.03e-05	0.00112064	2.48079
SLC7A5	1.20064	1.20064	7.22914	3.35004	0.00290168	0.0190572	-1.88339
ENTPD5	-1.19656	1.19656	9.41593	-4.11978	0.000451755	0.00561743	-0.115782
CD22	1.19589	1.19589	6.95537	2.06046	0.0513966	0.137457	-4.5117
SNORA80E	1.19493	1.19493	9.81705	5.56105	1.38e-05	0.000712855	3.23975
SLC1A1	-1.19424	1.19424	7.95305	-3.95157	0.000680616	0.00727754	-0.507494
RND1	1.19368	1.19368	6.29384	3.83111	0.000912109	0.00871915	-0.786663
C4BPA	1.19326	1.19326	5.51312	2.44686	0.0228794	0.0778721	-3.79346
GBP4	1.19182	1.19182	6.82802	2.46017	0.022229	0.0762509	-3.76744
LOC102724971	1.19029	1.19029	8.95571	2.59728	0.0164589	0.0618309	-3.49485
NR4A1	1.18715	1.18715	7.20405	4.12177	0.000449568	0.00560503	-0.111139
HOXD13	1.18663	1.18663	7.27439	3.07171	0.00558988	0.0296246	-2.49817
IRAK3	1.1863	1.1863	6.51322	3.06633	0.00566046	0.0298576	-2.50987
CCDC3	1.18586	1.18586	6.82571	3.69077	0.00128135	0.011094	-1.11002
CAV1	1.18469	1.18469	7.99402	4.91432	6.52e-05	0.0017499	1.74379
TNFRSF9	1.18355	1.18355	6.22443	2.69091	0.0133611	0.0535324	-3.30433
FRMD1	-1.18277	1.18277	6.54807	-7.01167	4.95e-07	0.000135268	6.43446
IL7R	1.18115	1.18115	7.24365	3.16663	0.00447659	0.0255413	-2.29059
PDK4	-1.17572	1.17572	8.65986	-4.07104	0.000508772	0.00603199	-0.229477
PLEK	1.17566	1.17566	6.5564	2.48071	0.0212583	0.0739237	-3.7271
GZMK	1.17367	1.17367	5.99791	2.99494	0.00668121	0.0335701	-2.66429
CDKN2B	-1.16805	1.16805	8.82662	-4.38531	0.000236266	0.00373646	0.505387
SLC28A2	1.16612	1.16612	7.33598	2.13696	0.043991	0.123514	-4.37566
CLDN8	-1.16457	1.16457	7.95377	-1.35629	0.18879	0.345202	-5.58897
RAVER2	-1.16336	1.16336	9.76115	-6.90457	6.27e-07	0.000151423	6.20811
PITPNC1	1.15916	1.15916	7.69638	3.92474	0.000726525	0.00759186	-0.569786
PFKFB3	1.15866	1.15866	7.974	3.89873	0.000773968	0.00790361	-0.630129
CCL19	1.15846	1.15846	7.63587	2.17891	0.040352	0.116436	-4.2997
RAC2	1.15459	1.15459	9.00482	3.84416	0.000883674	0.00852951	-0.75649
SLC19A3	-1.1538	1.1538	6.32018	-5.01667	5.09e-05	0.00149235	1.98241
VLDLR	-1.15178	1.15178	6.33732	-4.77051	9.24e-05	0.00215291	1.40775
TMEM171	-1.15011	1.15011	8.69077	-6.30222	2.44e-06	0.000289551	4.90527
NXPE2	-1.14854	1.14854	7.68973	-4.74332	9.87e-05	0.00225544	1.34414
CD180	1.14547	1.14547	6.47086	2.19313	0.0391818	0.113931	-4.27374
LPCAT1	1.14504	1.14504	7.93506	4.25283	0.000326495	0.00455965	0.195184
SUGCT	-1.14467	1.14467	5.85263	-5.59515	1.27e-05	0.00068305	3.3177
ADH6	-1.14215	1.14215	7.21401	-4.42392	0.000215013	0.0035617	0.59586
MMP10	1.14013	1.14013	5.00748	2.62641	0.0154292	0.0591652	-3.43594
CYP4X1	1.1358	1.1358	5.71234	3.50449	0.00200653	0.0150398	-1.53519
PECAM1	1.13531	1.13531	8.87469	3.10513	0.00517043	0.0281617	-2.42535
ST3GAL1	1.13227	1.13227	7.13413	3.15496	0.00460095	0.0260614	-2.31624
B3GNT7	1.13105	1.13105	9.24271	3.14262	0.00473605	0.0265712	-2.34331
CXCR5	1.12775	1.12775	5.91024	3.09078	0.00534672	0.02874	-2.45666
DUSP10	1.12707	1.12707	6.28408	4.93689	6.17e-05	0.00168312	1.79646
FPR2	1.12557	1.12557	4.69538	2.85313	0.00925699	0.0419724	-2.96662
MAPRE3	-1.12488	1.12488	7.15036	-5.51381	1.54e-05	0.000763361	3.13161
PRDM1	1.12134	1.12134	8.44887	2.89043	0.00849991	0.0396123	-2.8877
CTSE	1.12131	1.12131	10.1014	3.70291	0.0012443	0.0108631	-1.08215
SCIN	-1.11878	1.11878	7.82076	-4.25278	0.000326536	0.00455965	0.195064
RUNDC3B	-1.1118	1.1118	6.35659	-4.45733	0.000198179	0.00336796	0.674141
CPT1A	-1.11117	1.11117	9.28255	-6.18864	3.17e-06	0.000326691	4.65423
IGKC	1.10829	1.10829	9.96213	2.14938	0.0428836	0.121326	-4.35327
WARS1	1.10444	1.10444	8.87877	2.87028	0.00890122	0.0408608	-2.93039
LTF	1.10199	1.10199	5.96676	2.59486	0.0165472	0.0620405	-3.49972
USP2	-1.10173	1.10173	8.04706	-4.15115	0.000418472	0.00533736	-0.0425413
APOL1	1.10089	1.10089	7.27772	2.84708	0.00938557	0.0423474	-2.97936
SNORD116-6	1.1006	1.1006	6.66994	3.24011	0.00376527	0.0226626	-2.12837
H3C6	-1.10025	1.10025	6.03629	-8.39838	2.65e-08	2.79e-05	9.21284
MT1H	-1.09908	1.09908	8.85066	-3.00591	0.00651364	0.0329899	-2.64066
RHOH	1.097	1.097	6.87152	2.81528	0.0100906	0.0444064	-3.04622
VWF	1.09661	1.09661	6.55703	4.07307	0.000506251	0.00601087	-0.224726
LRRC66	-1.09606	1.09606	6.73492	-5.02141	5.03e-05	0.00148339	1.99344
SLC9A3-OT1	-1.0954	1.0954	9.2895	-2.27541	0.0329956	0.100653	-4.12146
MGP	1.09497	1.09497	6.3794	2.67309	0.0139046	0.0551476	-3.34084
SERPINE1	1.09408	1.09408	6.27089	2.85318	0.00925588	0.0419724	-2.96651
KDELR3	1.09384	1.09384	8.951	4.26879	0.000314019	0.00445415	0.232527
PDXDC2P-NPIPB14P	-1.09249	1.09249	8.73726	-6.13225	3.61e-06	0.000347467	4.529
TDO2	1.09207	1.09207	5.263	2.22449	0.0367094	0.10855	-4.21612
IFI6	1.09175	1.09175	9.00226	4.0372	0.000552517	0.00633965	-0.308331
FADS1	1.09128	1.09128	6.68239	2.63332	0.015194	0.058621	-3.42191
BACE2	1.09083	1.09083	9.31409	5.64149	1.14e-05	0.000633701	3.42343
ADAMTS9	1.09045	1.09045	6.62914	3.8192	0.00093885	0.00888467	-0.814186
IFI16	1.09006	1.09006	7.67089	3.92681	0.000722885	0.00757185	-0.564994
SULF1	1.08901	1.08901	6.87749	3.48205	0.00211741	0.0156285	-1.58605
ASPHD2	1.08874	1.08874	6.70713	4.85095	7.6e-05	0.00192545	1.59582
COL4A1	1.08818	1.08818	7.0523	4.2373	0.000339114	0.00466377	0.158844
NAALADL1	-1.08663	1.08663	7.14885	-4.1466	0.000423134	0.00537146	-0.0531465
CD274	1.08629	1.08629	5.59362	2.63231	0.0152281	0.0586685	-3.42396
OAS2	1.08329	1.08329	7.05108	3.45413	0.00226376	0.0162388	-1.64921
TCL1A	1.0831	1.0831	6.19939	1.93161	0.0664143	0.164972	-4.73324
TAGLN	1.08288	1.08288	7.29462	3.73705	0.00114566	0.01026	-1.00364
FLNA	1.08241	1.08241	9.37281	4.31608	0.00027978	0.0041825	0.343217
RSRP1	-1.07983	1.07983	7.20639	-5.55108	1.41e-05	0.00072275	3.21695
CHAD	-1.07965	1.07965	6.98382	-4.93711	6.17e-05	0.00168312	1.79697
CEMIP	1.07928	1.07928	6.02557	2.74485	0.0118352	0.0494057	-3.19305
CA2	-1.07864	1.07864	10.4408	-4.1022	0.000471541	0.00576427	-0.156794
SNORD116-26	1.07694	1.07694	4.96152	4.34404	0.000261314	0.00400477	0.408708
MSN	1.07361	1.07361	9.08394	3.48236	0.00211587	0.0156285	-1.58536
CYP7B1	1.07281	1.07281	6.80585	3.78461	0.00102101	0.00949153	-0.894053
PTGDR	-1.07177	1.07177	7.96748	-4.20007	0.000371375	0.00495455	0.0717847
HEG1	1.07065	1.07065	7.17006	3.22265	0.00392361	0.0233336	-2.16702
CREB3L2	1.06784	1.06784	8.82527	5.72772	9.3e-06	0.000561648	3.61959
NPY1R	-1.06753	1.06753	4.74715	-4.4044	0.000225511	0.00365215	0.550103
SLFN5	1.06739	1.06739	7.8828	3.99542	0.00061171	0.00680283	-0.405573
SLAMF6	1.06735	1.06735	6.58456	2.56655	0.0176147	0.0648165	-3.55662
CHI3L2	1.06577	1.06577	5.15558	2.80845	0.0102484	0.0448401	-3.06053
ALDOB	1.06489	1.06489	7.58629	1.52898	0.140547	0.280341	-5.35698
CA7	-1.06449	1.06449	8.053	-2.52823	0.0191625	0.0689506	-3.63311
REP15	-1.06381	1.06381	7.39712	-4.01931	0.000577123	0.00656569	-0.349968
SERPINB9	1.06322	1.06322	7.93615	2.92091	0.00792558	0.0378049	-2.82289
CA12	-1.06307	1.06307	11.1549	-5.53328	1.47e-05	0.000738783	3.17621
CMAHP	-1.06255	1.06255	7.01968	-4.69463	0.000111125	0.00239934	1.23016
CD34	1.0624	1.0624	7.44646	4.27556	0.000308872	0.00441123	0.248366
RHOU	-1.06233	1.06233	9.10579	-5.20969	3.19e-05	0.00115565	2.43075
S100A9	1.06152	1.06152	6.61404	2.70655	0.0129005	0.052287	-3.27217
PLEKHG6	-1.061	1.061	7.71573	-5.26844	2.77e-05	0.00106418	2.56674
GBP5	1.06011	1.06011	6.27972	2.28558	0.0322959	0.0990814	-4.10239
NAAA	-1.06004	1.06004	9.51483	-5.93033	5.78e-06	0.000445035	4.07739
RNF152	-1.05997	1.05997	8.30688	-3.34718	0.00292152	0.0191427	-1.88981
TRHDE	-1.05903	1.05903	5.69681	-3.02573	0.00622089	0.0319537	-2.59786
SLC2A3	1.05843	1.05843	6.89795	3.13028	0.00487494	0.027056	-2.37035
LAX1	1.05803	1.05803	6.43733	2.60599	0.0161443	0.0609946	-3.47726
COL1A1	1.05751	1.05751	8.65566	3.79674	0.000991422	0.00926841	-0.866065
RGS2	1.05652	1.05652	7.09578	5.14006	3.78e-05	0.00126213	2.26929
MTNR1A	1.0548	1.0548	8.20621	4.18371	0.000386503	0.00508088	0.0335442
IL13RA2	1.05465	1.05465	4.38682	2.25564	0.0343948	0.103525	-4.15837
EPHA2	1.05342	1.05342	7.99294	3.72103	0.00119095	0.0105106	-1.0405
MPP7	-1.0531	1.0531	8.00614	-6.28338	2.55e-06	0.000296742	4.86375
LEAP2	-1.05192	1.05192	5.89655	-4.40316	0.000226194	0.00366007	0.5472
LOC107984974	-1.05173	1.05173	7.45608	-7.51682	1.65e-07	7.83e-05	7.4797
P2RY8	1.05108	1.05108	6.20665	3.14087	0.00475552	0.0266408	-2.34715
CD82	1.04789	1.04789	8.40127	6.0159	4.73e-06	0.000404749	4.26935
ZRANB2	-1.04712	1.04712	8.5158	-10.7754	3.12e-10	2.94e-06	13.3212
GUCY1A1	1.04644	1.04644	6.14094	3.67395	0.00133449	0.0113985	-1.14862
SLC26A3	-1.04488	1.04488	12.4927	-4.18219	0.000387939	0.00508608	0.029994
COL6A3	1.04485	1.04485	7.5843	2.96658	0.00713412	0.0351774	-2.72526
RAPGEFL1	-1.04348	1.04348	9.28397	-4.68203	0.000114587	0.00242979	1.20064
TIMP3	1.0425	1.0425	8.58429	3.62305	0.00150885	0.012373	-1.26517
TRIM22	1.04227	1.04227	6.90896	3.96878	0.000652697	0.00709573	-0.467508
PLA2G12B	-1.04126	1.04126	5.94794	-4.34528	0.000260522	0.00399927	0.411618
FUT8	1.04032	1.04032	7.99384	4.06935	0.000510863	0.00604746	-0.233397
MS4A8	-1.03951	1.03951	7.33027	-3.48232	0.00211604	0.0156285	-1.58544
TRIM36	-1.03949	1.03949	6.24479	-5.34936	2.28e-05	0.000954758	2.75358
SERPING1	1.03917	1.03917	8.37046	3.12308	0.00495782	0.0273755	-2.38611
PLAU	1.03909	1.03909	7.2621	2.87173	0.00887181	0.0408108	-2.92733
PRXL2A	-1.03902	1.03902	8.0023	-5.81664	7.54e-06	0.000499714	3.82106
FCMR	1.03671	1.03671	7.12104	2.81421	0.0101151	0.0444696	-3.04846
CNTN3	-1.03481	1.03481	6.09942	-3.28721	0.0033683	0.0210666	-2.02371
SELENBP1	-1.03338	1.03338	11.3235	-3.6461	0.00142726	0.0118859	-1.21242
SCD	1.02993	1.02993	9.17925	3.24076	0.00375947	0.0226421	-2.12692
TAT	-1.029	1.029	5.04371	-7.49665	1.73e-07	7.83e-05	7.43868
ETNK1	-1.02875	1.02875	8.40968	-4.83089	7.98e-05	0.00197926	1.54894
ACADS	-1.02695	1.02695	8.90015	-4.48943	0.000183245	0.00318961	0.749383
HSPB8	1.0247	1.0247	5.70453	3.49691	0.00204336	0.0152371	-1.5524
PLAAT2	-1.02445	1.02445	6.7934	-3.87933	0.000811317	0.00809213	-0.675067
PCSK5	-1.02298	1.02298	8.38499	-3.87887	0.000812225	0.00809263	-0.676134
ADGRL4	1.02167	1.02167	6.2181	2.77003	0.011181	0.0475101	-3.14076
GUCY1B1	1.02131	1.02131	6.04658	4.25786	0.000322508	0.00453026	0.206957
ZG16B	1.01915	1.01915	9.2596	4.334	0.000267803	0.00406324	0.38518
VTRNA1-1	1.01855	1.01855	4.77912	2.61402	0.0158596	0.0602397	-3.46104
RNU4ATAC	1.01711	1.01711	8.42169	5.73362	9.17e-06	0.000555677	3.63298
ENPP2	1.01699	1.01699	8.31921	2.82091	0.00996223	0.044022	-3.03441
RIPOR2	1.01368	1.01368	6.12126	2.6371	0.0150667	0.0583207	-3.41423
PLS3	1.01353	1.01353	7.1351	5.70678	9.77e-06	0.000570002	3.57201
CARD6	1.01315	1.01315	5.21572	5.18536	3.39e-05	0.00118858	2.37439
SPP1	1.01311	1.01311	6.10902	2.03666	0.0539183	0.142168	-4.55335
FOSB	1.01299	1.01299	6.3453	3.92674	0.000723003	0.00757185	-0.56515
CDH5	1.01193	1.01193	7.34302	4.17826	0.00039168	0.00510933	0.0208044
NCS1	1.01126	1.01126	6.53016	5.02344	5e-05	0.00148338	1.99816
ENTPD1	1.01065	1.01065	7.863	3.32299	0.00309431	0.0198539	-1.94391
STX11	1.01051	1.01051	7.35277	2.63207	0.0152363	0.0586695	-3.42445
CFI	1.0081	1.0081	5.44858	2.56121	0.0178232	0.0653539	-3.56732
TRIB2	1.00788	1.00788	6.41473	3.72824	0.00117034	0.0103947	-1.0239
TMEM220	-1.00774	1.00774	6.71492	-4.58188	0.000146252	0.00279899	0.966044
PLLP	1.00755	1.00755	8.80225	3.62047	0.00151827	0.0124277	-1.27107
SPARC	1.00728	1.00728	10.0377	3.43244	0.00238425	0.0167858	-1.69818
PCOLCE	1.00691	1.00691	8.13723	3.55792	0.00176499	0.0138057	-1.41379
SLC25A20	-1.00598	1.00598	7.89483	-6.11116	3.79e-06	0.000355777	4.48206
MCAM	1.00477	1.00477	7.1206	4.01699	0.000580395	0.00659223	-0.355371
SLC20A2	-1.00452	1.00452	8.77363	-5.24706	2.92e-05	0.00110057	2.51728
CCL18	1.00386	1.00386	7.94281	1.64706	0.113783	0.240409	-5.18556
SLC10A5	-1.00261	1.00261	8.2058	-3.26525	0.00354808	0.0218435	-2.07258
LRRC31	-1.00204	1.00204	7.22828	-3.62919	0.0014867	0.0122384	-1.25114
GPR183	1.00178	1.00178	6.16134	3.34241	0.00295483	0.0193006	-1.90049
FAIM2	1.001	1.001	6.4639	4.70156	0.000109265	0.00238121	1.24639
CHN1	0.999151	0.999151	5.72174	4.05417	0.000530131	0.0061956	-0.268796
CCL21	0.997715	0.997715	8.55446	2.37672	0.02661	0.086502	-3.92932
COL1A2	0.996971	0.996971	8.48196	3.3284	0.00305486	0.0196947	-1.93183
CMBL	-0.996812	0.996812	9.30731	-3.85134	0.00086841	0.00846015	-0.739887
IL6	0.993353	0.993353	5.11683	2.49443	0.0206325	0.0724207	-3.70007
P2RY10	0.993285	0.993285	6.07433	2.83719	0.00959967	0.04294	-3.00019
KLHL5	0.993248	0.993248	6.17976	2.84796	0.00936674	0.0422827	-2.97751
ACTA2	0.992635	0.992635	9.85031	3.40892	0.00252199	0.0173511	-1.75119
MME	0.992579	0.992579	5.94049	3.32657	0.00306813	0.0197195	-1.93591
SLC20A1	-0.992015	0.992015	8.60223	-3.41411	0.00249092	0.0172635	-1.7395
CIPC	-0.991879	0.991879	7.96878	-5.53801	1.46e-05	0.00073629	3.18704
NAT8B	-0.988668	0.988668	6.2127	-4.82915	8.01e-05	0.00197926	1.54487
ZC3H12A	0.987867	0.987867	8.18188	3.1271	0.00491137	0.0271732	-2.37731
APPL2	-0.987243	0.987243	9.26999	-5.28128	2.69e-05	0.00105385	2.5964
ARSJ	0.986369	0.986369	6.52578	5.34317	2.32e-05	0.000966863	2.73931
SLC5A1	0.985553	0.985553	8.87498	3.82241	0.000931576	0.00884608	-0.806778
CDH11	0.985435	0.985435	7.68422	3.25265	0.00365538	0.0222857	-2.10056
RNU5E-1	0.985021	0.985021	8.68044	3.5273	0.00189967	0.0145042	-1.48341
CH25H	0.983467	0.983467	6.2241	4.96717	5.73e-05	0.00162039	1.86707
SNORA14A	0.98337	0.98337	7.00404	5.17213	3.5e-05	0.00121126	2.3437
COL15A1	0.983355	0.983355	6.9872	4.21526	0.000357855	0.0048358	0.107305
FMO5	-0.983056	0.983056	8.66701	-3.28517	0.00338465	0.0211482	-2.02826
MT1G	-0.982404	0.982404	11.6564	-2.79682	0.0105226	0.045632	-3.08488
SOCS1	0.981378	0.981378	7.11357	5.10179	4.14e-05	0.00132762	2.18042
AQP11	-0.980595	0.980595	6.6675	-5.8252	7.39e-06	0.000497409	3.84041
HCAR3	0.979217	0.979217	5.34681	2.39519	0.0255769	0.0840568	-3.89377
ABCC13	-0.979009	0.979009	5.27245	-5.78589	8.11e-06	0.000521502	3.75149
TWSG1	0.977383	0.977383	7.74879	5.96276	5.36e-06	0.000432079	4.15025
CRYAB	0.977041	0.977041	6.4268	3.03289	0.00611842	0.0315822	-2.58239
APCDD1	0.976606	0.976606	7.5723	5.41165	1.97e-05	0.000882673	2.89704
HOXA5	-0.976014	0.976014	7.09289	-5.86735	6.69e-06	0.000470535	3.93558
PTCH2	0.975961	0.975961	7.06252	2.53277	0.0189728	0.0684179	-3.62408
PDE4B	0.97589	0.97589	5.96864	4.10618	0.000466992	0.00573876	-0.14752
EFNA1	-0.9757	0.9757	7.56021	-3.00015	0.00660112	0.0333167	-2.65308
FCRL5	0.974575	0.974575	5.8758	2.28571	0.0322875	0.0990814	-4.10216
GDF15	0.973782	0.973782	8.15581	4.03891	0.000550211	0.00632826	-0.304332
CALCRL	0.972588	0.972588	6.25553	3.12971	0.00488149	0.027065	-2.3716
ADGRF1	0.971649	0.971649	5.82399	2.02825	0.0548361	0.143931	-4.568
SLC23A1	-0.971348	0.971348	6.81253	-4.66065	0.00012071	0.00251042	1.15058
SNORA54	0.971172	0.971172	7.16323	4.8166	8.26e-05	0.00200665	1.51553
MOGAT2	-0.970186	0.970186	8.62995	-4.08784	0.000488342	0.00587537	-0.190282
SNX30	-0.97008	0.97008	8.32325	-6.02528	4.63e-06	0.000400391	4.29036
HPGDS	-0.970012	0.970012	6.44289	-2.87152	0.00887613	0.0408158	-2.92778
STC1	0.969387	0.969387	5.41269	2.45034	0.0227078	0.0774356	-3.78666
NR1I2	-0.969377	0.969377	6.92195	-5.48915	1.64e-05	0.000796947	3.07508
STING1	0.968452	0.968452	8.42105	6.22296	2.93e-06	0.000316815	4.73025
C1R	0.967084	0.967084	8.31414	2.89889	0.00833663	0.0390483	-2.86974
FPR1	0.965974	0.965974	5.68551	2.73109	0.0122079	0.0503681	-3.22153
IFI44L	0.965253	0.965253	5.86149	4.17414	0.000395637	0.0051471	0.0111802
SLC23A3	-0.964516	0.964516	6.11575	-4.66717	0.000118808	0.00248851	1.16585
IRF4	0.963588	0.963588	7.52288	2.72751	0.0123069	0.05061	-3.22895
LY6G5B	-0.963327	0.963327	6.76082	-6.71429	9.59e-07	0.000184484	5.8019
IFITM3	0.962029	0.962029	8.08787	3.60437	0.00157831	0.0127585	-1.30785
SLC22A18AS	-0.96186	0.96186	6.6478	-5.24096	2.96e-05	0.00111122	2.50316
PDK2	-0.960698	0.960698	8.51969	-3.91686	0.000740586	0.00769415	-0.588075
GULP1	-0.960097	0.960097	6.351	-3.88689	0.000796551	0.00800415	-0.657555
CXCR2	0.958512	0.958512	4.84496	2.62628	0.0154338	0.0591653	-3.43621
ROBO1	0.958478	0.958478	7.18733	2.72963	0.0122483	0.0504905	-3.22457
CDHR1	-0.957624	0.957624	8.22559	-2.60013	0.0163554	0.0615401	-3.4891
SNORD94	0.956123	0.956123	8.88312	4.11609	0.000455836	0.00564955	-0.124387
SLCO1B3	0.955464	0.955464	4.11731	1.85388	0.0772393	0.183208	-4.86203
ACKR2	-0.954505	0.954505	6.64669	-5.15148	3.67e-05	0.00125169	2.2958
ARHGDIB	0.954343	0.954343	8.76832	3.16836	0.0044584	0.0254564	-2.28677
HEPACAM2	-0.954179	0.954179	9.52121	-2.94597	0.00748141	0.0363297	-2.76939
SFXN1	-0.953455	0.953455	8.70711	-5.42676	1.9e-05	0.000870758	2.93179
CYP4F2	-0.952469	0.952469	6.76236	-2.73187	0.0121867	0.0503338	-3.21993
LYVE1	0.952376	0.952376	6.65467	2.12018	0.0455275	0.126479	-4.40577
GRAMD2B	-0.951965	0.951965	8.56944	-6.80675	7.8e-07	0.000168987	5.99992
EOLA1-DT	-0.951891	0.951891	6.38191	-7.55542	1.52e-07	7.56e-05	7.55803
SCML1	-0.951532	0.951532	6.44347	-6.5054	1.54e-06	0.000225105	5.35022
MOGAT3	-0.950603	0.950603	7.68679	-5.89052	6.34e-06	0.000465131	3.9878
IGKV1D-8	0.95018	0.95018	6.24658	2.65175	0.014583	0.0569631	-3.38441
AREG	0.949939	0.949939	7.86016	2.96851	0.00710234	0.0350671	-2.72111
ABI3BP	0.947157	0.947157	7.92329	3.0941	0.00530544	0.0285914	-2.44942
IGKV2-24	0.946907	0.946907	9.66667	2.21396	0.0375233	0.110334	-4.23552
SAA1	0.946768	0.946768	5.27646	2.32965	0.0294204	0.0928052	-4.01921
CSF2RB	0.946014	0.946014	7.51847	2.99822	0.00663074	0.0334303	-2.65724
STAP1	0.945883	0.945883	5.1285	1.94071	0.0652395	0.163031	-4.71793
AKR7L	-0.944952	0.944952	6.46341	-7.51491	1.66e-07	7.83e-05	7.47581
TRIM40	0.944213	0.944213	7.5908	1.78626	0.0878731	0.199958	-4.97093
APLNR	0.942925	0.942925	6.90314	4.75613	9.57e-05	0.0022015	1.3741
ABCB11	-0.942604	0.942604	4.90664	-5.76724	8.47e-06	0.000531408	3.70924
NNMT	0.942006	0.942006	7.23223	2.91509	0.00803239	0.0381311	-2.8353
BCL2A1	0.941887	0.941887	6.10288	2.69699	0.0131802	0.0530445	-3.29184
MAOA	-0.941553	0.941553	9.06348	-3.43194	0.0023871	0.0167922	-1.69931
ST3GAL2	0.941335	0.941335	7.25121	4.8138	8.32e-05	0.0020155	1.50899
MZB1	0.940915	0.940915	7.67446	2.39958	0.0253367	0.0834419	-3.88529
MCOLN2	-0.939844	0.939844	7.96965	-3.06006	0.00574368	0.0301347	-2.52348
FGFR3	-0.939511	0.939511	7.66816	-5.72026	9.46e-06	0.000564389	3.60264
CCDC68	-0.939142	0.939142	8.05253	-4.92545	6.34e-05	0.00171306	1.76978
FMO4	-0.937288	0.937288	6.92331	-4.17164	0.000398056	0.00515986	0.00534218
PSD3	-0.936635	0.936635	7.56427	-4.87232	7.22e-05	0.00185306	1.64573
ERVK13-1	-0.935848	0.935848	6.98075	-7.78828	9.31e-08	5.85e-05	8.02579
DYSF	0.935473	0.935473	5.78074	3.50693	0.00199485	0.0149701	-1.52967
BEST2	-0.935334	0.935334	8.20905	-2.62161	0.0155944	0.0595684	-3.44566
INHBA	0.934448	0.934448	5.81568	2.97477	0.00700032	0.0347545	-2.70767
ME3	-0.933582	0.933582	7.55055	-7.37204	2.26e-07	8.57e-05	7.18396
PLVAP	0.932511	0.932511	8.35891	4.28694	0.00030041	0.00433616	0.274999
CREB3L1	0.931633	0.931633	9.3237	7.16379	3.55e-07	0.00011488	6.75316
C5orf63	-0.931615	0.931615	6.96302	-5.30222	2.56e-05	0.00102134	2.64478
PACS1	0.931561	0.931561	8.06696	4.39645	0.000229927	0.0036951	0.531488
ZNF91	-0.9306	0.9306	9.38069	-4.42015	0.000217005	0.00357272	0.587008
GRAMD1C	-0.930597	0.930597	6.6665	-5.12773	3.89e-05	0.001282	2.24068
C1S	0.930257	0.930257	8.6993	2.51999	0.0195117	0.0697943	-3.64949
CGN	-0.930195	0.930195	8.11041	-7.15516	3.61e-07	0.00011488	6.73517
EXPH5	-0.92981	0.92981	8.41138	-2.67872	0.0137306	0.0546875	-3.32931
WIPF1	0.92907	0.92907	8.61144	3.4383	0.00235111	0.0166542	-1.68497
LBH	0.928993	0.928993	6.69893	4.20946	0.000362956	0.00487328	0.0937476
CD27	0.928909	0.928909	7.76976	2.38769	0.0259915	0.0850582	-3.90821
PDP1	0.927868	0.927868	9.06643	4.06648	0.000514449	0.00606496	-0.240086
GXYLT2	-0.927593	0.927593	7.0922	-3.47213	0.00216831	0.0158245	-1.60851
IFT74	-0.926718	0.926718	6.84164	-6.90964	6.2e-07	0.000151423	6.21884
PRKXP1	-0.926529	0.926529	5.53471	-2.87269	0.00885232	0.0407609	-2.92529
ANO9	-0.925999	0.925999	9.04829	-9.51454	3.01e-09	9.72e-06	11.2416
AHSA2P	-0.925774	0.925774	6.69996	-5.6146	1.21e-05	0.000665551	3.3621
NRXN3	0.925204	0.925204	5.93872	5.19933	3.27e-05	0.00116471	2.40677
ORAI2	0.924991	0.924991	7.40196	2.80674	0.0102884	0.0449575	-3.06412
FYN	0.924639	0.924639	6.88296	4.30834	0.000285112	0.00420881	0.325112
PTPRC	0.924115	0.924115	7.95058	2.25644	0.034337	0.103417	-4.15688
BMAL2	0.92411	0.92411	6.44878	2.92603	0.00783277	0.0374855	-2.81197
ACTG2	0.923641	0.923641	9.85112	2.33562	0.0290493	0.0919422	-4.00786
ICAM2	0.923116	0.923116	7.89244	3.84304	0.000886088	0.00854843	-0.759089
GDPD3	-0.922506	0.922506	8.96627	-4.06693	0.000513885	0.00606496	-0.239038
TMEM92	0.920768	0.920768	7.02869	5.57148	1.35e-05	0.000708369	3.26361
KDR	0.920013	0.920013	6.75028	2.88936	0.00852072	0.0396777	-2.88996
ZFPM2	0.919766	0.919766	6.42296	4.21434	0.000358666	0.0048398	0.105138
SRD5A3	0.918698	0.918698	8.86992	3.25997	0.00359261	0.022017	-2.08429
FFAR2	0.918674	0.918674	5.40851	3.06179	0.0057206	0.0300303	-2.51973
ADAM19	0.918127	0.918127	7.46496	3.0408	0.00600693	0.0311603	-2.56526
GPRC5B	0.917417	0.917417	7.45275	4.61975	0.000133356	0.00264899	1.05478
HNF4G	-0.91683	0.91683	8.46983	-4.96067	5.82e-05	0.00164115	1.85193
MACIR	-0.915278	0.915278	8.5095	-6.06271	4.24e-06	0.000382197	4.37401
SLC36A1	-0.915152	0.915152	8.46243	-3.46602	0.00220027	0.0159719	-1.62233
EBF1	0.914415	0.914415	6.50411	3.42877	0.00240524	0.0168555	-1.70646
SPMIP4	-0.914027	0.914027	7.37543	-4.4769	0.000188935	0.00326154	0.720014
SNORD116-24	0.913541	0.913541	9.76759	3.64169	0.00144253	0.0119584	-1.22252
LIPG	0.912323	0.912323	7.673	3.89158	0.000787534	0.00796877	-0.646699
SLC7A2	0.911429	0.911429	6.08301	4.27717	0.00030766	0.00440371	0.252138
PTP4A3	0.910473	0.910473	7.4695	3.54359	0.0018268	0.0141367	-1.44638
GEM	0.908312	0.908312	6.34218	3.31566	0.00314862	0.020093	-1.96028
OR51E2	0.908279	0.908279	5.95951	3.66637	0.00135912	0.0115253	-1.16598
MGC32805	-0.908192	0.908192	4.47761	-3.63312	0.00147266	0.0121493	-1.24214
BHLHE40	0.907776	0.907776	8.33561	4.00009	0.000604784	0.00675802	-0.394695
HOXA7	-0.907661	0.907661	8.32433	-5.36649	2.19e-05	0.000932984	2.79305
CYP2C19	-0.907439	0.907439	5.6243	-3.25107	0.003669	0.0223327	-2.10405
SPINK4	0.906512	0.906512	8.47836	1.56993	0.130729	0.265451	-5.29867
KCNJ15	0.906332	0.906332	5.14919	2.67834	0.0137424	0.0547229	-3.3301
MSC	0.906089	0.906089	6.09739	3.69203	0.00127744	0.0110667	-1.10712
MYEOV	0.905461	0.905461	6.85711	3.84626	0.00087917	0.00851219	-0.751622
HAPLN3	0.904813	0.904813	6.2108	3.3381	0.00298522	0.0194032	-1.91012
CLEC6A	0.903901	0.903901	4.52427	2.62711	0.0154051	0.0591089	-3.43451
CSF3R	0.903864	0.903864	5.8527	2.71709	0.0125986	0.0513952	-3.25045
TENT5C	0.903328	0.903328	8.99298	5.59852	1.26e-05	0.00068305	3.32539
HBEGF	0.903129	0.903129	8.17391	1.988	0.0594202	0.152523	-4.63749
ABCA5	-0.902285	0.902285	7.23956	-3.7303	0.00116452	0.0103646	-1.01916
NR4A3	0.90141	0.90141	5.80684	4.32528	0.000273563	0.00412202	0.364768
CYYR1	0.90111	0.90111	6.63945	3.57139	0.00170874	0.0134452	-1.38311
IQGAP2	-0.901042	0.901042	9.76347	-5.93294	5.74e-06	0.000445035	4.08326
TCF4	0.900672	0.900672	8.28327	3.14925	0.00466299	0.026263	-2.32877
FERMT2	0.900436	0.900436	6.53441	3.64868	0.0014184	0.011857	-1.20651
PEA15	0.899751	0.899751	9.70457	4.42151	0.000216287	0.0035726	0.590192
TRPV3	-0.89962	0.89962	6.00311	-4.87913	7.1e-05	0.00182519	1.66163
ACADM	-0.899614	0.899614	9.56277	-5.76075	8.6e-06	0.000531408	3.69452
SMPDL3A	-0.898738	0.898738	9.64176	-4.41818	0.00021805	0.0035858	0.582396
SLC10A2	-0.89804	0.89804	5.39648	-3.44987	0.00228694	0.0163362	-1.65884
GLCCI1	0.897675	0.897675	7.78722	3.31261	0.00317152	0.0202254	-1.9671
TDP2	-0.89717	0.89717	9.73784	-4.63834	0.00012745	0.00258063	1.09833
EPHX2	-0.896673	0.896673	7.61379	-3.0984	0.00525237	0.0284437	-2.44003
SLC9A2	-0.896426	0.896426	9.50492	-3.94305	0.000694881	0.00736738	-0.527291
DDAH2	-0.89609	0.89609	7.89499	-5.77583	8.3e-06	0.000525034	3.72871
LAMP3	0.895425	0.895425	6.85647	2.80628	0.0102991	0.0449652	-3.06508
SLC27A2	-0.895256	0.895256	8.96827	-5.83907	7.15e-06	0.00048685	3.87174
MOXD1	0.894785	0.894785	5.60887	3.45776	0.00224421	0.0161784	-1.64102
NRN1	0.894635	0.894635	6.41775	5.42016	1.93e-05	0.000876719	2.91662
CD37	0.894623	0.894623	7.78046	2.17975	0.0402817	0.116251	-4.29817
SLC6A19	-0.8946	0.8946	7.11655	-1.79536	0.0863732	0.197576	-4.95645
NRG4	-0.894233	0.894233	4.9466	-3.84529	0.000881244	0.00851478	-0.753866
CAVIN1	0.893647	0.893647	6.8984	4.52295	0.000168858	0.00303693	0.827932
VPS13A	-0.893492	0.893492	7.53858	-5.71315	9.62e-06	0.000569238	3.58651
BTG2	0.891856	0.891856	8.67182	5.32049	2.45e-05	0.000997585	2.68698
MMP2	0.891018	0.891018	8.66859	2.34792	0.0282984	0.09008	-3.98444
NCOA7	0.890794	0.890794	6.89857	4.01085	0.00058915	0.00665515	-0.369676
TMTC1	0.890699	0.890699	5.90286	3.05334	0.00583431	0.030483	-2.53808
LOXL2	0.889578	0.889578	7.26772	2.90117	0.00829318	0.0389129	-2.8649
RETNLB	-0.889547	0.889547	8.6738	-2.18679	0.0396997	0.11511	-4.28533
SLAIN1	0.889493	0.889493	6.13905	4.77993	9.03e-05	0.00212103	1.42978
PDGFRB	0.889463	0.889463	7.09553	3.32664	0.00306763	0.0197195	-1.93576
ELK3	0.888232	0.888232	7.37878	4.10151	0.000472333	0.0057668	-0.158399
ARHGAP29	0.887581	0.887581	5.0802	3.87322	0.000823451	0.00816135	-0.689221
MYOCD	0.887508	0.887508	6.07821	3.9447	0.0006921	0.00734848	-0.523463
PRAF2	0.887156	0.887156	6.91799	4.75999	9.48e-05	0.00218973	1.38314
ME1	0.886434	0.886434	8.05564	2.47933	0.0213224	0.0740645	-3.72982
ZNF429	-0.886358	0.886358	6.5645	-4.38679	0.000235413	0.00373225	0.508859
ENG	0.885062	0.885062	8.58559	2.95035	0.00740624	0.0360949	-2.76002
PIGZ	-0.882867	0.882867	8.53767	-3.21069	0.00403584	0.0238345	-2.19347
SNORD116-25	0.882718	0.882718	5.11093	4.84967	7.62e-05	0.00192887	1.59282
EMB	0.882439	0.882439	6.83776	3.57972	0.0016748	0.0132887	-1.3641
CXCR4	0.882129	0.882129	6.69759	2.49634	0.0205467	0.0722488	-3.6963
NAT2	-0.881506	0.881506	6.78964	-4.1816	0.000388496	0.00508608	0.028619
TCIM	0.881417	0.881417	6.34782	3.32843	0.0030546	0.0196947	-1.93175
JUNB	0.880831	0.880831	9.51667	4.81845	8.22e-05	0.00200665	1.51986
SNORA52	0.880319	0.880319	8.9875	4.83043	7.99e-05	0.00197926	1.54785
CA4	-0.880093	0.880093	9.64174	-2.91373	0.00805749	0.038231	-2.83819
CCNJL	-0.880032	0.880032	7.89421	-4.52925	0.000166279	0.00301397	0.842716
ARHGAP42	-0.879939	0.879939	8.03115	-5.92121	5.9e-06	0.000445035	4.05688
IL2RA	0.879602	0.879602	6.74369	1.98216	0.0601138	0.153801	-4.6475
IGSF9	-0.879316	0.879316	7.68916	-4.40908	0.000222948	0.00362936	0.561073
ACADVL	-0.878882	0.878882	9.87693	-7.71021	1.1e-07	6.27e-05	7.86986
HLA-DOB	0.878465	0.878465	6.14051	2.35063	0.0281356	0.0897436	-3.97928
TFPI2	0.877224	0.877224	4.64971	3.08761	0.00538634	0.0288624	-2.46355
HIBCH	-0.877156	0.877156	7.40718	-5.66162	1.09e-05	0.000615128	3.46928
HLA-DMA	0.877072	0.877072	9.44622	2.91337	0.00806421	0.0382409	-2.83896
PUS10	-0.875436	0.875436	6.18173	-5.70106	9.9e-06	0.000572421	3.55903
CD93	0.875309	0.875309	7.37882	3.07661	0.00552645	0.0293968	-2.48752
SLC16A4	0.873763	0.873763	5.56323	3.67799	0.00132153	0.0113546	-1.13935
INTS6L	-0.873571	0.873571	6.71961	-4.9873	5.46e-05	0.00156922	1.91399
STXBP1	0.872796	0.872796	7.93667	5.37239	2.16e-05	0.000930405	2.80665
TM4SF18	0.871982	0.871982	6.05046	2.9463	0.00747574	0.0363116	-2.76869
UGP2	-0.871817	0.871817	9.80635	-5.85988	6.81e-06	0.000472186	3.91872
HSD3BP4	-0.871375	0.871375	5.54868	-3.9135	0.00074666	0.00773367	-0.595867
PDE8A	-0.871113	0.871113	9.32457	-6.51841	1.49e-06	0.000225105	5.37852
ZNF814	-0.871074	0.871074	6.45586	-4.86951	7.26e-05	0.00185815	1.63917
FLT1	0.870735	0.870735	6.28002	3.13347	0.00483872	0.0269547	-2.36337
SLAMF1	0.869917	0.869917	5.39017	2.98949	0.00676614	0.0338673	-2.67604
KCNK5	-0.868755	0.868755	7.64848	-4.98637	5.47e-05	0.00156928	1.91183
SDR16C5	0.868649	0.868649	5.6446	4.72396	0.000103469	0.00230011	1.29882
CCDC112	-0.868276	0.868276	5.79026	-5.80555	7.74e-06	0.000508019	3.79597
SCARNA10	0.867917	0.867917	8.35032	3.97559	0.000641964	0.00701139	-0.451675
C7	0.867072	0.867072	6.6358	2.49439	0.020634	0.0724207	-3.70014
SLC16A14	0.865943	0.865943	7.07434	3.46213	0.00222086	0.0160651	-1.63114
CD81	0.865178	0.865178	10.5851	5.05029	4.69e-05	0.00142847	2.06066
DPYSL3	0.864711	0.864711	7.34237	3.73499	0.00115139	0.0102818	-1.00838
MIR196A1	-0.863658	0.863658	7.3861	-3.46584	0.00220121	0.0159719	-1.62274
KMO	0.863283	0.863283	4.96162	2.31963	0.0300528	0.0942011	-4.03821
HDHD3	-0.863155	0.863155	8.39581	-7.14977	3.66e-07	0.00011488	6.72393
CD3E	0.863039	0.863039	7.95243	4.41479	0.000219861	0.0035915	0.574458
ABCC9	0.86214	0.86214	5.11136	4.01092	0.00058904	0.00665515	-0.369496
SNX10	0.861648	0.861648	6.45561	3.10548	0.00516625	0.0281471	-2.42459
TRIM31	-0.861523	0.861523	8.99386	-2.75783	0.0114935	0.0484166	-3.16612
NEIL1	-0.861109	0.861109	6.54903	-9.06583	7.08e-09	1.67e-05	10.4479
MEDAG	0.860836	0.860836	5.68579	2.77315	0.0111024	0.0472548	-3.13427
ELOVL5	0.860246	0.860246	8.11053	2.29646	0.031563	0.0973963	-4.08194
COX7B	-0.85999	0.85999	7.33593	-3.69318	0.00127389	0.011046	-1.10447
DDR2	0.85947	0.85947	7.50902	3.33625	0.00299841	0.0194492	-1.91427
MAST2	-0.859038	0.859038	9.08514	-6.49535	1.57e-06	0.000225105	5.32835
THRB	-0.85807	0.85807	7.39889	-2.40495	0.0250456	0.0828017	-3.87491
LY6E	0.857979	0.857979	7.28907	3.79663	0.000991691	0.00926841	-0.866324
LINC01089	-0.857194	0.857194	6.4563	-8.39627	2.66e-08	2.79e-05	9.20883
ABHD3	-0.857164	0.857164	9.38504	-6.06138	4.26e-06	0.000382197	4.37105
CCDC69	0.857098	0.857098	6.76292	3.57127	0.00170921	0.0134452	-1.38337
SCN9A	-0.856755	0.856755	5.8535	-3.11948	0.00499977	0.0275345	-2.39398
SPARCL1	0.856541	0.856541	8.0165	2.88816	0.00854433	0.0397604	-2.89253
KTN1	-0.856135	0.856135	8.82821	-6.87752	6.66e-07	0.000151423	6.15067
TMT1B	-0.855513	0.855513	8.56033	-3.6821	0.00130848	0.0112785	-1.12993
ACAT1	-0.855342	0.855342	8.37864	-4.57625	0.000148273	0.00282253	0.952854
CD38	0.855267	0.855267	7.1689	2.22102	0.0369756	0.109098	-4.22251
CHST11	0.85483	0.85483	8.05982	3.10108	0.00521961	0.0283304	-2.43419
ABCD3	-0.854414	0.854414	9.02786	-6.81754	7.61e-07	0.000166888	6.02295
TMEM156	0.854126	0.854126	5.29458	2.33025	0.0293831	0.0927832	-4.01808
GCG	0.85394	0.85394	9.15996	2.11939	0.0456013	0.126602	-4.40719
CAPN13	-0.853927	0.853927	7.51758	-1.92426	0.067377	0.166705	-4.74557
SLC26A4	0.852944	0.852944	4.5808	2.23028	0.0362686	0.107609	-4.20542
CLYBL	-0.851691	0.851691	7.48926	-3.629	0.00148735	0.0122384	-1.25156
SLC25A34	-0.850256	0.850256	6.75507	-4.55197	0.000157319	0.00291032	0.895943
MYO1A	-0.849729	0.849729	9.55171	-3.88128	0.000807489	0.00807104	-0.670559
SNORA7B	0.849356	0.849356	8.86353	5.08302	4.33e-05	0.00135384	2.1368
FCN3	0.849197	0.849197	6.1846	2.6084	0.0160582	0.0607493	-3.47239
TAGAP	0.849055	0.849055	6.18749	2.54133	0.0186195	0.0674995	-3.60703
HAVCR1	-0.848506	0.848506	6.42365	-2.11533	0.0459814	0.127245	-4.41447
RASGRP1	0.848485	0.848485	6.70688	2.85269	0.00926626	0.0419799	-2.96754
RNPC3	-0.847797	0.847797	8.45383	-6.14672	3.49e-06	0.000344161	4.56117
ADGRG6	0.847595	0.847595	7.77498	2.60877	0.0160452	0.0607219	-3.47165
C4BPB	0.847171	0.847171	5.21655	2.8448	0.00943468	0.0424876	-2.98418
NID1	0.847135	0.847135	7.21138	2.73482	0.0121061	0.0500903	-3.21384
PRAC1	0.847051	0.847051	6.76107	2.75185	0.0116498	0.048876	-3.17854
SNHG12	-0.846608	0.846608	7.02389	-8.70555	1.43e-08	2.25e-05	9.78942
PRDX6	-0.846371	0.846371	9.54683	-3.67848	0.00131995	0.0113463	-1.13821
F2RL2	0.846141	0.846141	6.02136	2.25723	0.0342802	0.103328	-4.15541
SETD9	-0.845681	0.845681	6.0254	-4.49668	0.000180034	0.00315348	0.766363
BCL6	0.845611	0.845611	6.56179	3.16854	0.00445655	0.0254564	-2.28638
FMOD	0.845568	0.845568	7.97794	4.46097	0.000196426	0.00334795	0.682669
GPX8	0.844639	0.844639	5.2687	3.39751	0.00259158	0.0176878	-1.77687
HSD17B3	-0.844263	0.844263	5.02646	-6.37963	2.05e-06	0.000257086	5.07543
PLCE1	-0.843953	0.843953	9.39919	-3.87858	0.000812796	0.00809404	-0.676804
XBP1	0.843818	0.843818	10.6911	4.27197	0.000311587	0.00444306	0.239978
KIRREL1	0.842366	0.842366	6.68866	3.70656	0.00123335	0.0107987	-1.07375
ARHGAP15	0.842078	0.842078	6.25351	3.21517	0.0039934	0.0236579	-2.18356
CCN2	0.842062	0.842062	8.55052	3.69398	0.00127144	0.011031	-1.10264
RHOJ	0.841866	0.841866	6.99353	3.72759	0.0011722	0.0103947	-1.02541
PLPP1	-0.841858	0.841858	9.11696	-5.7589	8.64e-06	0.000531408	3.69033
BPNT1	-0.840787	0.840787	7.71527	-5.92556	5.84e-06	0.000445035	4.06667
ANXA6	0.839905	0.839905	9.14454	2.95372	0.00734897	0.0359273	-2.75281
SYNPO2	0.839673	0.839673	7.63812	2.6589	0.0143523	0.0563666	-3.36983
C1orf115	-0.839617	0.839617	8.08072	-5.07373	4.43e-05	0.00137065	2.1152
NETO2	-0.839592	0.839592	8.15454	-1.91649	0.0684093	0.168573	-4.75859
LRRK2	0.838843	0.838843	4.96128	2.85987	0.00911567	0.0414871	-2.9524
HMOX1	-0.838796	0.838796	7.80706	-4.39064	0.000233215	0.00372748	0.517861
FBN1	0.83802	0.83802	6.53404	2.77903	0.0109557	0.0468616	-3.12202
AKR1C2	-0.836777	0.836777	6.97192	-3.41633	0.00247778	0.0172166	-1.7345
IFITM2	0.836088	0.836088	8.06619	2.99455	0.00668735	0.0335721	-2.66515
HLA-DQB1	0.835625	0.835625	5.32948	2.1357	0.0441046	0.123704	-4.37793
HTR1D	0.835374	0.835374	6.07021	2.38588	0.0260926	0.0852908	-3.9117
CCDC80	0.834683	0.834683	6.84705	2.63446	0.0151556	0.0585448	-3.4196
TNS1	0.83467	0.83467	7.67687	3.21034	0.00403918	0.0238467	-2.19425
PAM	0.834222	0.834222	7.73087	5.75807	8.65e-06	0.000531408	3.68844
ENGASE	-0.834036	0.834036	7.21258	-7.01997	4.86e-07	0.000134769	6.45194
P2RY1	-0.833713	0.833713	7.47631	-3.80871	0.000963056	0.00907728	-0.838427
MNDA	0.833317	0.833317	5.17222	2.22165	0.0369273	0.109007	-4.22136
IKZF3	0.833261	0.833261	6.94015	2.13453	0.0442106	0.123775	-4.38003
TFF1	0.833193	0.833193	9.24506	1.93284	0.066255	0.164759	-4.73118
NFKBIZ	0.83235	0.83235	8.27031	2.91296	0.00807175	0.0382409	-2.83983
PRR15	-0.831891	0.831891	9.87593	-3.67897	0.00131838	0.011338	-1.13709
CD44	0.831787	0.831787	9.57176	3.32717	0.00306381	0.0197195	-1.93458
BTBD3	-0.831683	0.831683	8.3377	-5.5612	1.38e-05	0.000712855	3.2401
PEX26	-0.831034	0.831034	9.05592	-5.05131	4.68e-05	0.00142847	2.06303
SLC6A6	0.830598	0.830598	7.24878	2.79254	0.0106254	0.0459298	-3.09383
VTRNA1-3	0.830309	0.830309	5.44513	5.24981	2.9e-05	0.00109772	2.52364
ALDH1A2	0.829486	0.829486	5.61518	2.97848	0.0069405	0.034542	-2.69969
POU2AF1	0.828881	0.828881	7.17695	2.4028	0.0251616	0.0830545	-3.87906
HOOK1	-0.828612	0.828612	8.11421	-4.78176	8.99e-05	0.00211574	1.43407
DNAH7	-0.828485	0.828485	4.84411	-6.79163	8.07e-07	0.000170858	5.96762
GDPD2	-0.828447	0.828447	6.20835	-3.31952	0.00311994	0.0199708	-1.95167
LIAT1	-0.827935	0.827935	6.36441	-4.41289	0.000220883	0.00360278	0.570007
CD69	0.82791	0.82791	5.80486	2.72583	0.0123534	0.0506799	-3.23241
CCDC14	-0.827789	0.827789	7.48291	-3.66249	0.00137192	0.0116078	-1.17489
ACVR1C	-0.826866	0.826866	8.23733	-3.71995	0.00119406	0.010533	-1.04297
DDX60	-0.826156	0.826156	8.25109	-4.21101	0.00036159	0.00486653	0.0973602
CYTIP	0.824495	0.824495	7.1504	2.32423	0.0297608	0.0935347	-4.02949
CRYL1	-0.823841	0.823841	8.36277	-5.02451	4.99e-05	0.00148338	2.00065
LYN	0.823742	0.823742	8.92554	2.95151	0.00738654	0.0360175	-2.75755
TUSC3	0.823561	0.823561	7.10669	3.07113	0.00559753	0.0296485	-2.49944
HOXA3	-0.822731	0.822731	6.60749	-5.45964	1.76e-05	0.000827214	3.00734
ACSL4	0.822088	0.822088	6.80461	2.20867	0.037938	0.111207	-4.24524
EHHADH	-0.821636	0.821636	7.12182	-3.91138	0.000750523	0.00774868	-0.600789
TREM1	0.821544	0.821544	5.37211	2.51702	0.0196388	0.0700891	-3.65537
SEPTIN6	0.821207	0.821207	7.6164	3.05027	0.00587603	0.0306585	-2.54472
FFAR4	0.820537	0.820537	9.34497	3.77731	0.00103922	0.00960455	-0.910882
GPR160	-0.820471	0.820471	8.6947	-4.36664	0.000247287	0.00385894	0.461641
SNORA37	0.820002	0.820002	8.89892	4.42457	0.000214673	0.0035617	0.597379
IKZF1	0.819982	0.819982	6.60749	2.35681	0.0277674	0.0890208	-3.96748
SLC22A3	-0.819807	0.819807	5.37923	-4.41279	0.000220939	0.00360278	0.569764
LAMC1	0.819429	0.819429	7.61136	3.27894	0.00343492	0.0213523	-2.04212
PLA2G2D	0.819205	0.819205	7.37958	2.80022	0.0104417	0.0453855	-3.07776
SNORD14E	0.819131	0.819131	6.93333	3.39341	0.00261703	0.0177779	-1.78608
IL2RB	0.818978	0.818978	7.57403	3.39932	0.00258035	0.0176412	-1.77277
SLC39A5	-0.818569	0.818569	9.49024	-3.02824	0.0061848	0.0318258	-2.59244
ADGRF5	0.81783	0.81783	5.88991	3.55675	0.00176994	0.0138273	-1.41644
MIR570HG	-0.81778	0.81778	6.82657	-3.23375	0.0038222	0.0229101	-2.14245
APOBEC3G	0.817597	0.817597	6.09599	3.13656	0.00480375	0.0268154	-2.35659
PDLIM3	0.817463	0.817463	6.49831	4.31504	0.000280487	0.00418322	0.340796
ARGLU1	-0.817254	0.817254	8.29906	-4.57096	0.0001502	0.00284279	0.940447
LOC100506730	-0.816831	0.816831	6.68287	-6.04123	4.46e-06	0.000391002	4.32602
TMEM131L	0.81663	0.81663	6.83378	2.657	0.0144134	0.0565232	-3.37372
TLR10	0.816549	0.816549	5.44904	2.12107	0.0454455	0.126387	-4.40419
GNG11	0.815947	0.815947	6.8552	3.73036	0.00116436	0.0103646	-1.01903
STAT1	0.815538	0.815538	9.80646	3.24603	0.00371296	0.0224727	-2.11523
EIF5A2	0.81551	0.81551	5.93852	5.79089	8.01e-06	0.000519875	3.76281
MX2	0.815374	0.815374	6.37125	2.70307	0.0130015	0.0525836	-3.27932
TM6SF2	-0.814171	0.814171	7.1704	-2.95339	0.00735444	0.0359338	-2.7535
DAPK2	-0.813396	0.813396	8.02945	-6.26144	2.68e-06	0.000304562	4.81533
SYT11	0.813186	0.813186	6.03833	3.46319	0.00221521	0.0160365	-1.62873
SLC4A4	-0.810843	0.810843	10.4464	-2.94333	0.00752699	0.036415	-2.77503
A1CF	-0.81082	0.81082	8.93494	-3.92955	0.000718084	0.00754129	-0.558636
AHCYL2	-0.81041	0.81041	11.0758	-6.87719	6.67e-07	0.000151423	6.14997
P2RX4	-0.810077	0.810077	8.60641	-4.88049	7.07e-05	0.00182164	1.66482
VIPR1	-0.80966	0.80966	8.98927	-2.7618	0.011391	0.0481462	-3.15788
SRGN	0.809585	0.809585	8.50785	2.19798	0.0387901	0.113036	-4.26487
SNORD59B	-0.809466	0.809466	5.91725	-3.2097	0.00404523	0.0238489	-2.19565
ANXA2R-OT1	0.809241	0.809241	5.75929	6.51281	1.51e-06	0.000225105	5.36635
VIL1	-0.809173	0.809173	10.0604	-5.41465	1.95e-05	0.000881623	2.90395
THBS2	0.808182	0.808182	6.41762	3.61618	0.00153407	0.0125135	-1.28089
TNFSF8	0.807605	0.807605	6.74478	2.89968	0.00832148	0.0390123	-2.86806
SMAP2	0.807177	0.807177	8.75429	4.1813	0.000388788	0.00508608	0.027901
LHFPL6	0.806891	0.806891	8.62945	2.57268	0.017378	0.0642466	-3.54432
MARVELD3	-0.806701	0.806701	8.11012	-5.11288	4.03e-05	0.00131077	2.20618
RASSF5	0.806698	0.806698	7.38815	3.03109	0.00614401	0.0316623	-2.58628
KIT	0.806314	0.806314	7.05394	2.67468	0.0138553	0.0550328	-3.33759
SNORD46	0.806031	0.806031	8.04292	4.65521	0.00012232	0.00252281	1.13784
PTGR1	-0.805582	0.805582	7.13845	-4.5612	0.000153815	0.00286867	0.917589
MUC1	0.805302	0.805302	10.4052	3.78457	0.0010211	0.00949153	-0.894144
SLC9A7	0.804526	0.804526	6.48709	3.32688	0.00306588	0.0197195	-1.93522
KLK10	0.804482	0.804482	7.10796	2.47672	0.021444	0.0743911	-3.73496
SNORA24	0.804299	0.804299	9.63111	3.03996	0.00601863	0.0311953	-2.56707
KRT20	-0.80319	0.80319	11.6171	-6.19833	3.1e-06	0.000323001	4.67572
GPC6	0.802657	0.802657	6.74808	3.93737	0.000704554	0.00745281	-0.540484
SORD	0.802408	0.802408	8.30328	5.01634	5.09e-05	0.00149235	1.98163
SLFN11	0.80211	0.80211	6.7236	2.40796	0.024884	0.0823685	-3.86909
CTC-338M12.4	-0.80186	0.80186	6.13323	-5.38718	2.09e-05	0.000904548	2.84071
SNORD82	0.80183	0.80183	6.67728	2.89382	0.00843409	0.0393737	-2.8805
DENND5A	0.801672	0.801672	6.97268	3.52423	0.00191375	0.0145644	-1.4904
JAM2	0.8004	0.8004	7.51868	5.76273	8.56e-06	0.000531408	3.69902
GDA	-0.799761	0.799761	7.99613	-4.4158	0.000219321	0.0035858	0.576818
LUC7L3	-0.79967	0.79967	7.18098	-4.3968	0.000229734	0.0036951	0.532294
ASRGL1	0.799556	0.799556	7.37519	4.9847	5.5e-05	0.00156955	1.90793
CHRDL2	0.799313	0.799313	6.09705	3.44411	0.00231865	0.0165064	-1.67184
CYP3A5	-0.798945	0.798945	7.97949	-3.33426	0.00301262	0.0195157	-1.91872
SNORA21	0.798802	0.798802	7.14609	3.3059	0.00322243	0.0204394	-1.98208
DUSP4	0.798469	0.798469	5.63067	3.8039	0.000974362	0.0091427	-0.84954
ADA2	0.797899	0.797899	7.57943	2.89428	0.00842517	0.0393516	-2.87952
NIBAN1	0.797391	0.797391	6.32127	3.16836	0.00445838	0.0254564	-2.28677
CRISPLD2	0.797194	0.797194	6.78276	3.29486	0.00330786	0.0207924	-2.00669
SNORD49A	-0.796802	0.796802	5.53307	-6.22613	2.91e-06	0.000316815	4.73728
NUDT12	-0.796482	0.796482	7.26614	-4.18154	0.000388561	0.00508608	0.0284607
CCDC146	-0.794966	0.794966	6.35668	-4.43293	0.000210338	0.00351393	0.616968
ITGAL	0.794648	0.794648	7.07605	2.83611	0.00962331	0.0429879	-3.00247
SLC41A1	0.794464	0.794464	6.86066	3.67136	0.00134286	0.011434	-1.15456
SP110	0.794308	0.794308	7.08573	3.51858	0.00193988	0.0147068	-1.50323
BDH2	-0.794298	0.794298	6.01945	-4.94104	6.11e-05	0.00167844	1.80613
ACAA2	-0.794022	0.794022	8.78983	-4.5099	0.000174319	0.00309424	0.797352
LIAS	-0.792569	0.792569	6.31028	-6.57228	1.32e-06	0.000221095	5.49549
ZNF439	-0.791234	0.791234	5.55852	-6.4282	1.83e-06	0.000243086	5.18179
ADGRE2	0.790362	0.790362	6.727	2.09742	0.0476892	0.130307	-4.44638
TSPAN7	-0.789969	0.789969	10.1456	-2.63314	0.0152002	0.0586328	-3.42228
SLC25A33	-0.789699	0.789699	7.11729	-4.52441	0.000168255	0.00303693	0.831366
UCA1	0.789183	0.789183	7.07094	1.64736	0.11372	0.240357	-5.1851
TGFB1	0.788967	0.788967	7.16941	3.31797	0.0031314	0.0200122	-1.95512
TSHZ2	0.788732	0.788732	6.00503	4.23002	0.000345197	0.00472228	0.141809
MFAP4	0.784726	0.784726	7.61122	3.05682	0.00578717	0.0303039	-2.53052
TRAT1	0.784659	0.784659	5.68909	3.82736	0.00092046	0.00877229	-0.795344
ARHGEF3	0.784322	0.784322	6.84061	5.07762	4.39e-05	0.00136331	2.12423
GIPC2	-0.78409	0.78409	8.4812	-4.08925	0.000486674	0.00587343	-0.18701
TNFSF13B	0.783845	0.783845	6.68807	3.01191	0.00642362	0.0326393	-2.62771
PDPN	0.783707	0.783707	6.21287	2.88512	0.0086039	0.039933	-2.89896
CGAS	0.78365	0.78365	6.19746	3.20235	0.00411592	0.0241201	-2.21189
SLC7A1	0.782801	0.782801	8.57154	4.5343	0.000164247	0.00299442	0.854528
GRAMD4	-0.782512	0.782512	8.52782	-6.40753	1.92e-06	0.000251266	5.13657
CADM1	0.782401	0.782401	6.3605	3.96907	0.000652236	0.00709481	-0.466833
NAPEPLD	-0.782114	0.782114	8.38588	-4.15535	0.000414203	0.00531166	-0.0327258
RAB8B	0.781787	0.781787	7.701	3.49468	0.00205428	0.0153064	-1.55744
SPOCK2	0.781756	0.781756	7.47414	3.61424	0.00154123	0.0125448	-1.28531
KCNJ2	-0.780819	0.780819	7.80329	-3.7368	0.00114635	0.01026	-1.00421
VGLL3	0.780647	0.780647	5.42654	3.36966	0.00276935	0.0184746	-1.83942
ZG16	-0.780585	0.780585	10.8299	-2.71891	0.0125471	0.0512162	-3.24669
CDHR2	-0.779117	0.779117	9.91931	-2.509	0.0199864	0.0708869	-3.67127
PODXL	0.778937	0.778937	8.5275	4.62225	0.000132546	0.00264284	1.06064
ELAPOR2	-0.778822	0.778822	7.06806	-2.16266	0.0417284	0.119244	-4.32925
HOXB5	-0.778609	0.778609	7.12484	-3.74631	0.00112027	0.0101141	-0.982328
CLCN2	-0.777923	0.777923	8.50888	-3.75989	0.00108403	0.00991032	-0.951048
HDGFL3	0.777734	0.777734	7.30091	4.04391	0.000543544	0.00628236	-0.292681
TMEM47	0.777718	0.777718	8.77017	3.51687	0.00194785	0.0147242	-1.50711
CORO1A	0.777639	0.777639	8.62934	2.09835	0.0475997	0.13024	-4.44474
KCNA3	0.777404	0.777404	6.48291	2.38919	0.0259083	0.0848284	-3.90534
TMEM45A	0.777264	0.777264	4.96562	3.57079	0.00171117	0.0134452	-1.38446
ADGRA2	0.77618	0.77618	7.39677	4.52935	0.000166242	0.00301397	0.842931
SNORD116-2	0.775896	0.775896	6.27199	2.96647	0.00713588	0.0351774	-2.72549
FLRT2	0.775778	0.775778	5.57373	4.62332	0.000132201	0.00264275	1.06315
CXCL16	0.775646	0.775646	8.07801	3.53716	0.00185524	0.0142573	-1.46101
SEC24D	0.775599	0.775599	8.41223	4.4722	0.000191117	0.00328418	0.708985
WFDC2	0.774591	0.774591	8.01312	3.2878	0.0033636	0.0210585	-2.0224
MGAT4A	-0.774182	0.774182	9.4453	-5.93383	5.73e-06	0.000445035	4.08525
CX3CL1	0.774072	0.774072	6.8795	6.07783	4.1e-06	0.000373216	4.40776
ADAMTS4	0.773735	0.773735	5.70119	4.1092	0.000463563	0.00571832	-0.140471
P3H2	0.773612	0.773612	8.39773	3.3293	0.00304833	0.0196795	-1.92982
INPP5J	-0.773494	0.773494	7.01798	-4.6867	0.00011329	0.00241593	1.21159
CD163L1	-0.773415	0.773415	7.40043	-3.41564	0.00248182	0.0172382	-1.73604
MKKS	-0.773124	0.773124	6.48389	-5.92484	5.85e-06	0.000445035	4.06505
CFAP44	-0.773	0.773	6.76202	-3.2492	0.00368526	0.0223955	-2.1082
COL4A2	0.772316	0.772316	7.40717	3.83577	0.000901863	0.00865192	-0.775901
OTC	-0.772004	0.772004	5.06181	-2.78967	0.0106948	0.046145	-3.09983
PFKFB2	-0.771922	0.771922	8.15937	-5.34984	2.28e-05	0.000954758	2.75467
ACYP1	-0.77111	0.77111	6.1179	-8.89037	9.96e-09	1.71e-05	10.1296
LANCL3	-0.771057	0.771057	5.78441	-4.47908	0.000187933	0.00325618	0.725119
OXR1	-0.770983	0.770983	7.98015	-5.14869	3.7e-05	0.00125169	2.28932
ALDH18A1	-0.770836	0.770836	8.91895	-5.24331	2.95e-05	0.00110831	2.50861
AKT3	0.770807	0.770807	6.62976	3.34958	0.00290488	0.0190668	-1.88443
ST3GAL4	0.770801	0.770801	8.0205	2.75735	0.0115061	0.0484548	-3.16712
SEMA5A	-0.770563	0.770563	8.92417	-3.43585	0.00236491	0.0167157	-1.6905
PDCD4	-0.770086	0.770086	9.77865	-3.12923	0.00488699	0.0270875	-2.37266
ISLR	0.770045	0.770045	6.83173	3.01902	0.00631864	0.0322832	-2.61238
NXPE3	0.770023	0.770023	5.91193	2.61291	0.0158986	0.0603271	-3.46328
ADM	0.769302	0.769302	8.59763	2.47029	0.0217459	0.0750241	-3.74759
WSCD1	-0.769182	0.769182	6.97416	-3.9609	0.000665345	0.00718352	-0.485831
AQP3	0.768495	0.768495	7.47386	5.20626	3.22e-05	0.00115836	2.42281
CPA3	0.768354	0.768354	7.3078	1.69949	0.10335	0.224809	-5.10626
AKR1C3	-0.768201	0.768201	7.98772	-3.09112	0.00534242	0.0287319	-2.45591
MAB21L3	-0.768183	0.768183	7.144	-2.612	0.0159306	0.0604064	-3.46512
THEMIS2	0.768025	0.768025	7.23825	2.22802	0.0364396	0.107939	-4.20958
RFTN1	0.767989	0.767989	6.99018	2.80245	0.010389	0.0452504	-3.0731
C2orf88	-0.767793	0.767793	7.82445	-3.46475	0.00220697	0.0160014	-1.62521
LTBP2	0.767776	0.767776	6.7853	3.19784	0.00415981	0.0242485	-2.22183
PALS1	-0.767724	0.767724	7.89947	-6.12273	3.69e-06	0.00035006	4.50782
AZGP1	0.76754	0.76754	6.98901	1.88819	0.0722841	0.175032	-4.80564
EPB41L3	-0.767362	0.767362	8.15885	-7.36154	2.31e-07	8.57e-05	7.1624
PAX5	0.767325	0.767325	6.9476	2.02918	0.0547338	0.143703	-4.56638
UGT2B10	-0.76723	0.76723	5.55206	-2.9661	0.00714197	0.0351983	-2.72628
DDC	-0.767034	0.767034	7.88662	-3.62668	0.00149572	0.0122965	-1.25688
SNORD116-29	0.767027	0.767027	5.5358	2.44306	0.0230688	0.0782986	-3.80089
FAM200B	-0.76639	0.76639	5.40609	-8.36533	2.83e-08	2.81e-05	9.14997
GPR65	0.765409	0.765409	5.83221	2.6334	0.0151914	0.058621	-3.42176
CCR7	0.764731	0.764731	7.21713	2.13235	0.0444085	0.124132	-4.38395
UGDH	-0.764539	0.764539	11.0847	-5.36344	2.21e-05	0.000933478	2.78604
JAK3	0.764069	0.764069	6.5109	2.71084	0.0127769	0.0518979	-3.26334
BATF2	0.763664	0.763664	7.80522	3.75339	0.00110123	0.0100128	-0.966023
SLC27A4	-0.763651	0.763651	8.53885	-5.23038	3.04e-05	0.00112092	2.47867
SP140	0.762665	0.762665	6.1631	2.33656	0.0289915	0.0918055	-4.00608
SNORA10	0.761848	0.761848	9.46795	3.95277	0.000678629	0.00726041	-0.504702
MICU2	-0.761567	0.761567	8.44815	-7.40962	2.08e-07	8.35e-05	7.26103
GLB1L2	-0.761415	0.761415	8.29174	-4.64549	0.000125252	0.00255533	1.11506
CD72	0.760684	0.760684	6.16884	2.09423	0.0479997	0.130909	-4.45205
EDN1	-0.760083	0.760083	7.65468	-2.3806	0.02639	0.0859512	-3.92187
CHAC1	0.75993	0.75993	6.64846	3.0071	0.00649575	0.0329525	-2.63811
KCNE3	0.75984	0.75984	6.73226	3.9263	0.000723775	0.00757515	-0.566168
EVI2B	0.759688	0.759688	9.16635	2.1552	0.042374	0.120294	-4.34276
CNN2	0.75931	0.75931	9.09838	4.65677	0.000121856	0.00252281	1.14149
PMEPA1	0.759101	0.759101	7.7822	4.1546	0.000414956	0.0053177	-0.0344656
MT1F	-0.758876	0.758876	11.4791	-2.48805	0.0209214	0.0731571	-3.71265
CD48	0.75839	0.75839	7.95218	2.34966	0.0281941	0.0898805	-3.98113
CCL22	0.758219	0.758219	6.55519	2.85622	0.00919195	0.0417939	-2.9601
NEK3	-0.757598	0.757598	7.57728	-4.94762	6.01e-05	0.00166403	1.82148
PTPN14	0.757459	0.757459	6.79282	5.02351	5e-05	0.00148338	1.99833
SCARA3	0.757385	0.757385	7.22517	4.09339	0.000481782	0.00584432	-0.177347
CDC42BPA	-0.757192	0.757192	8.24708	-5.80436	7.76e-06	0.000508019	3.79328
CLDN2	0.756361	0.756361	5.53476	3.66435	0.00136578	0.0115714	-1.17063
RNF122	0.755983	0.755983	6.44832	4.26925	0.000313669	0.00445415	0.233594
SNORD116-23	0.755298	0.755298	7.34405	3.85181	0.000867404	0.00845472	-0.738782
BCLAF3	-0.755272	0.755272	6.37753	-3.99167	0.000617324	0.00684943	-0.414299
NFE2L3	0.754956	0.754956	7.36082	3.50393	0.00200927	0.0150543	-1.53648
DHRS9	-0.754869	0.754869	8.77402	-2.75145	0.0116603	0.048876	-3.17937
STRADB	-0.754578	0.754578	9.82743	-4.79785	8.65e-05	0.00205515	1.47169
SPINK1	0.754479	0.754479	9.93198	3.59029	0.00163273	0.013075	-1.33999
SYTL2	-0.753972	0.753972	8.68564	-2.89203	0.00846889	0.0394971	-2.88432
CPT2	-0.753702	0.753702	7.87879	-5.38794	2.08e-05	0.000904548	2.84246
TGFB3	0.753515	0.753515	5.87166	4.95026	5.97e-05	0.0016599	1.82766
PHYH	-0.753367	0.753367	7.7205	-3.47718	0.00214226	0.015714	-1.59708
FASTKD1	-0.753249	0.753249	7.25779	-4.67979	0.000115214	0.0024376	1.1954
SF3B4	-0.753071	0.753071	7.65206	-8.03214	5.6e-08	4.05e-05	8.50696
TMEM109	0.751212	0.751212	9.1284	4.38541	0.000236209	0.00373646	0.50562
SOD3	0.751017	0.751017	7.31119	7.13312	3.79e-07	0.000117186	6.68919
HHLA2	-0.750427	0.750427	10.6765	-4.08179	0.000495607	0.00593186	-0.204406
MMP14	0.750344	0.750344	7.86577	4.95455	5.91e-05	0.00165184	1.83764
TTYH3	0.750052	0.750052	8.20208	3.91674	0.000740803	0.00769415	-0.588354
LOC285097	-0.750021	0.750021	5.67289	-4.17622	0.000393633	0.00512811	0.016041
CTSH	0.749515	0.749515	8.42755	2.4133	0.0245993	0.081742	-3.85874
FCRLA	0.74896	0.74896	5.37067	2.63623	0.015096	0.0583983	-3.416
ISX	-0.748885	0.748885	7.71042	-2.19682	0.0388834	0.113238	-4.26699
PPP1R14C	-0.747812	0.747812	6.97074	-5.33436	2.37e-05	0.000976677	2.71898
LCP2	0.74737	0.74737	8.04443	2.45316	0.0225694	0.0771034	-3.78115
GLI3	0.747313	0.747313	5.57267	3.76508	0.00107048	0.009815	-0.939082
FEZ1	0.747298	0.747298	5.23093	3.61477	0.00153926	0.0125358	-1.2841
SUCLG1	-0.746986	0.746986	9.09795	-5.41808	1.94e-05	0.000878293	2.91183
PHGDH	0.746157	0.746157	6.60014	3.35474	0.00286944	0.0188868	-1.87287
SLC17A9	0.745991	0.745991	7.4899	4.56042	0.000154108	0.00287065	0.915757
SLC15A2	0.745714	0.745714	6.31424	2.28293	0.0324772	0.0994744	-4.10737
WWTR1	0.745523	0.745523	7.26249	3.27281	0.00348512	0.0215757	-2.05576
GALNT12	-0.74538	0.74538	9.45835	-3.68281	0.00130624	0.0112695	-1.1283
TSPAN18	0.74509	0.74509	6.60524	4.24482	0.000332948	0.00461839	0.176428
FGF2	0.744996	0.744996	6.94408	4.28634	0.000300846	0.00433792	0.273608
KCNG3	-0.744716	0.744716	6.36731	-7.6543	1.23e-07	6.64e-05	7.75764
SFRP2	0.744379	0.744379	5.9165	2.12523	0.0450601	0.125506	-4.39673
C9orf85	-0.744244	0.744244	6.92936	-6.74536	8.95e-07	0.000183301	5.86857
IGFBP7	0.743277	0.743277	9.80169	2.94437	0.00750905	0.0363858	-2.77282
FER1L6	-0.743173	0.743173	8.03309	-3.31793	0.00313172	0.0200122	-1.95522
ZNF204P	-0.743083	0.743083	5.38805	-2.75166	0.0116549	0.048876	-3.17894
CELSR1	0.743032	0.743032	6.5937	5.94286	5.61e-06	0.000443969	4.10555
SNORD15B	0.742534	0.742534	7.83394	2.9817	0.00688907	0.0343379	-2.69278
CCL11	0.742506	0.742506	6.83871	2.4696	0.0217785	0.0751093	-3.74895
AGT	0.742061	0.742061	6.37877	2.37704	0.0265917	0.0864723	-3.9287
SNORA68	0.741913	0.741913	10.8901	2.62115	0.0156104	0.0596055	-3.44659
SNORA49	0.741801	0.741801	7.98208	3.24793	0.0036963	0.0224337	-2.11101
ABHD5	-0.741302	0.741302	8.35099	-5.36501	2.2e-05	0.000933478	2.78966
EHD3	0.741217	0.741217	6.70785	3.02872	0.0061779	0.0318022	-2.5914
LPIN3	-0.74109	0.74109	6.67009	-6.52275	1.48e-06	0.000225105	5.38796
HMGN5	-0.740292	0.740292	5.25681	-5.23237	3.02e-05	0.00112064	2.48328
GPD1L	-0.740239	0.740239	8.30633	-4.52255	0.00016902	0.00303693	0.827011
TRPS1	0.738837	0.738837	6.22114	3.02379	0.00624908	0.0320548	-2.60207
NXPE4	-0.738274	0.738274	10.6471	-3.09162	0.00533621	0.0287088	-2.45482
TSPAN11	0.737386	0.737386	7.96569	2.66484	0.0141632	0.055842	-3.3577
PMAIP1	0.736921	0.736921	6.414	2.82303	0.00991427	0.0438941	-3.02996
FAHD1	-0.736861	0.736861	7.36929	-5.43723	1.85e-05	0.000857614	2.95586
PGM2L1	0.73677	0.73677	6.93444	5.30888	2.52e-05	0.00101438	2.66017
LUM	0.736623	0.736623	9.08199	2.39891	0.0253733	0.0835478	-3.88659
KRCC1	-0.736166	0.736166	8.66567	-5.97979	5.15e-06	0.000421909	4.18845
NADSYN1	-0.735837	0.735837	8.57211	-9.50098	3.09e-09	9.72e-06	11.218
ARFGAP3	0.735825	0.735825	7.76922	3.61853	0.00152539	0.0124659	-1.27551
GIMAP4	0.735793	0.735793	6.43665	2.64191	0.0149062	0.0578538	-3.40444
PRKCH	0.735052	0.735052	7.93087	3.41112	0.00250874	0.0173071	-1.74622
NXPE1	-0.73456	0.73456	10.7572	-3.03801	0.006046	0.0313027	-2.5713
HCAR2	0.734185	0.734185	5.64416	2.38915	0.0259107	0.0848284	-3.90542
RAB17	-0.733829	0.733829	6.95112	-5.59675	1.27e-05	0.00068305	3.32134
PLIN2	-0.733531	0.733531	7.7542	-2.84897	0.00934524	0.042226	-2.97538
HSD17B11	-0.733511	0.733511	10.7906	-4.8624	7.39e-05	0.00188534	1.62257
KCNN3	0.73292	0.73292	6.37448	3.61747	0.00152927	0.0124852	-1.27792
GLIPR1	0.732874	0.732874	8.1661	2.45263	0.0225953	0.0771638	-3.78218
EPHB3	0.732711	0.732711	8.10318	4.43869	0.000207399	0.00348146	0.630474
MT1E	-0.732527	0.732527	9.59109	-3.64888	0.00141774	0.011857	-1.20607
CASP4	0.732492	0.732492	7.3736	3.83254	0.000908945	0.00870215	-0.783353
FLVCR2	-0.732448	0.732448	8.03524	-3.35492	0.00286821	0.0188853	-1.87247
SLCO4A1	0.732004	0.732004	6.75778	3.13826	0.00478465	0.0267296	-2.35287
CXCL3	0.731946	0.731946	6.3322	4.28614	0.000300992	0.00433792	0.273143
ARHGEF37	-0.731807	0.731807	6.6229	-4.95927	5.84e-05	0.00164429	1.84865
ITPKA	-0.731366	0.731366	7.06499	-4.48485	0.000185307	0.0032166	0.738633
TMEM154	0.73122	0.73122	6.93808	2.6878	0.0134543	0.0538403	-3.31069
LGI2	0.730798	0.730798	5.74401	2.81162	0.010175	0.0446481	-3.0539
TCP11L1	-0.7298	0.7298	6.95457	-5.41984	1.93e-05	0.000876719	2.91588
CCR4	0.729498	0.729498	5.50171	3.43098	0.00239255	0.0168103	-1.70147
LRP8	0.729408	0.729408	7.09101	2.94434	0.00750949	0.0363858	-2.77287
CYP4F11	-0.728297	0.728297	7.13155	-1.99299	0.0588337	0.151592	-4.62892
S1PR1	0.727828	0.727828	5.3222	3.54639	0.00181456	0.0140834	-1.44002
EAPP	-0.727349	0.727349	7.9244	-6.0219	4.67e-06	0.000401716	4.28278
ANGPT2	0.727016	0.727016	5.29144	3.29598	0.00329905	0.0207509	-2.00418
TBXAS1	0.72679	0.72679	7.59778	3.5448	0.00182149	0.0141188	-1.44363
SLC22A4	-0.726662	0.726662	6.17072	-2.93548	0.00766443	0.0369048	-2.79182
CD74	0.726174	0.726174	11.5831	2.97663	0.0069704	0.0346516	-2.70369
DES	0.725945	0.725945	9.02904	1.60549	0.122671	0.253617	-5.24704
IL21R	0.725699	0.725699	6.08705	3.14195	0.0047435	0.0265972	-2.34479
ARID5A	0.725436	0.725436	6.85752	3.56176	0.00174875	0.0137129	-1.40504
ZHX2	0.725068	0.725068	7.59437	4.31568	0.000280052	0.00418322	0.342285
PLEKHA2	0.724618	0.724618	8.37639	3.90144	0.000768877	0.00786867	-0.623834
ZYX	0.724417	0.724417	8.70281	3.71164	0.00121831	0.0106927	-1.06209
CCNL2	-0.724202	0.724202	7.50341	-6.13734	3.57e-06	0.000345164	4.54031
CYP2C9	-0.724077	0.724077	5.22233	-4.76532	9.36e-05	0.00217219	1.39561
SGMS1	0.72333	0.72333	7.35768	4.92668	6.32e-05	0.00171288	1.77264
LGALS3	-0.72327	0.72327	10.3531	-6.32474	2.32e-06	0.000279862	4.95485
UBE2L6	0.72284	0.72284	7.46235	3.87421	0.000821479	0.00815303	-0.686935
NID2	0.722089	0.722089	6.96583	3.5124	0.00196883	0.0148398	-1.51725
RASSF6	-0.721059	0.721059	7.81392	-5.04489	4.75e-05	0.00143755	2.0481
OLFML2B	0.720673	0.720673	5.66207	2.84102	0.00951619	0.0427321	-2.99213
SPNS2	0.720568	0.720568	8.01795	2.63999	0.0149701	0.0580185	-3.40836
LILRA3	0.720538	0.720538	6.09273	1.5642	0.132068	0.267469	-5.3069
MR1	0.72035	0.72035	6.76931	4.03956	0.000549347	0.00632826	-0.302831
CLMP	0.720305	0.720305	6.75038	3.54961	0.00180057	0.0139969	-1.43269
PLD1	-0.720232	0.720232	8.30866	-4.80706	8.45e-05	0.00203117	1.49323
RSAD2	-0.719682	0.719682	6.93311	-2.1894	0.0394855	0.114638	-4.28056
ASS1	0.719553	0.719553	9.38174	3.08572	0.00541016	0.0289571	-2.46767
RSPO3	0.719277	0.719277	5.76033	3.51504	0.00195641	0.0147757	-1.51126
LSAMP	0.719085	0.719085	6.05326	2.8681	0.00894574	0.0410108	-2.935
LEF1	0.71908	0.71908	6.23428	2.655	0.0144778	0.0566931	-3.37779
GJA1	0.718659	0.718659	6.39785	2.4906	0.0208056	0.0728739	-3.70763
AP1AR	-0.71849	0.71849	7.78136	-6.74662	8.92e-07	0.000183301	5.87128
RETSAT	-0.718098	0.718098	10.1159	-4.20409	0.000367751	0.00492014	0.0811762
BNIP3	0.717537	0.717537	7.14611	2.21689	0.0372952	0.109852	-4.23013
INPP5D	0.717428	0.717428	7.92538	2.38647	0.0260597	0.0852276	-3.91057
CD2AP	-0.717333	0.717333	10.4861	-6.10487	3.85e-06	0.000357445	4.46804
ASPN	0.717283	0.717283	5.92903	2.57864	0.0171512	0.0636884	-3.53237
PAG1	-0.717056	0.717056	8.73921	-3.28742	0.00336666	0.0210637	-2.02325
ATP2B1	-0.716912	0.716912	8.96878	-5.64411	1.13e-05	0.000633701	3.4294
SEMA7A	0.716602	0.716602	7.06013	2.44896	0.0227756	0.0776388	-3.78935
TGFB2	0.716501	0.716501	5.37325	3.72327	0.00118452	0.0104676	-1.03535
HGF	0.716051	0.716051	5.63304	2.09735	0.0476961	0.130307	-4.44651
DCN	0.715594	0.715594	7.90845	2.3682	0.0270994	0.0876546	-3.94566
ELL2	0.715499	0.715499	7.89179	3.96638	0.000656527	0.00712094	-0.473093
SLC38A5	0.715181	0.715181	6.69632	3.44131	0.00233421	0.0165796	-1.67816
SNORD116-13	0.714954	0.714954	3.9125	3.06193	0.00571879	0.0300292	-2.51943
SCARNA8	0.714733	0.714733	5.8813	4.42265	0.000215681	0.00356962	0.592885
SNORD116-11	0.714227	0.714227	5.25678	4.42075	0.000216684	0.0035726	0.588432
PEX11A	-0.713903	0.713903	6.93962	-5.06231	4.56e-05	0.0013985	2.08864
SHH	0.713703	0.713703	7.49515	3.86996	0.000829999	0.00819608	-0.696771
PMM1	-0.7134	0.7134	7.1482	-4.94251	6.09e-05	0.00167488	1.80958
FLNC	0.713357	0.713357	7.05133	2.90801	0.00816395	0.0385421	-2.85035
HOXD12	0.713263	0.713263	5.44323	3.41428	0.00248991	0.0172635	-1.73911
RMND5A	-0.713012	0.713012	8.99983	-3.98155	0.000632722	0.00695073	-0.437829
MRPS25	-0.713005	0.713005	7.62851	-5.33608	2.36e-05	0.000974791	2.72295
CALU	0.712818	0.712818	8.10491	3.30373	0.00323901	0.020517	-1.98691
CDK14	0.712778	0.712778	6.40982	2.96345	0.00718583	0.0353221	-2.73197
CRTC3	0.712022	0.712022	8.37248	5.27666	2.72e-05	0.00105679	2.58574
BAG2	0.711969	0.711969	6.33009	3.61316	0.00154525	0.0125667	-1.28778
GNA11	-0.71187	0.71187	10.7468	-5.64466	1.13e-05	0.000633701	3.43065
LCP1	0.711317	0.711317	9.34617	1.88385	0.0728957	0.176084	-4.81282
DIPK2B	0.711211	0.711211	5.16667	4.11932	0.000452255	0.00561994	-0.116841
TFPI	0.711091	0.711091	6.05491	2.47494	0.0215269	0.074514	-3.73845
MYO1D	-0.710784	0.710784	10.4398	-4.08832	0.000487775	0.00587537	-0.189171
PMP22	0.710466	0.710466	9.3175	3.249	0.00368698	0.0223987	-2.10864
HEATR5A	-0.710076	0.710076	8.22724	-6.43052	1.82e-06	0.000243086	5.18687
USP30	-0.709642	0.709642	8.78313	-4.89269	6.87e-05	0.00179553	1.6933
ITPR1	0.709596	0.709596	6.31242	3.74808	0.00111547	0.0100883	-0.978244
GRB10	0.709326	0.709326	6.71415	5.00835	5.19e-05	0.0015097	1.96304
USP32P1	-0.708489	0.708489	5.26895	-2.82933	0.00977322	0.0435132	-3.01674
TGFA	-0.708432	0.708432	6.81935	-4.2939	0.000295348	0.00428278	0.29129
OPN3	-0.708233	0.708233	8.28186	-3.90858	0.000755638	0.0077754	-0.607269
RAB6B	-0.708053	0.708053	6.10663	-5.59609	1.27e-05	0.00068305	3.31985
LETM1	-0.708047	0.708047	8.89296	-4.81308	8.33e-05	0.00201606	1.50731
NAA40	-0.708023	0.708023	7.52144	-7.25706	2.89e-07	9.92e-05	6.9469
ACKR1	0.707947	0.707947	6.26336	4.20978	0.000362677	0.004873	0.0944849
SAMD13	-0.70782	0.70782	6.40034	-3.24443	0.00372702	0.0225331	-2.11878
QPCT	0.707522	0.707522	6.10505	4.1355	0.000434758	0.00546011	-0.0790838
STK38	-0.706733	0.706733	9.73723	-6.71712	9.53e-07	0.000184484	5.80799
TESC	0.706676	0.706676	6.92393	3.92272	0.000730113	0.00761248	-0.574486
AKAP9	-0.70628	0.70628	8.12672	-3.6248	0.0015025	0.0123415	-1.26117
DNAH1	-0.705545	0.705545	6.39539	-6.48666	1.6e-06	0.000225105	5.3094
LYPD6B	0.704896	0.704896	6.4804	3.30398	0.00323711	0.0205119	-1.98636
ITGB3	0.704156	0.704156	6.6084	3.37241	0.00275129	0.0183982	-1.83325
SMIM5	-0.70401	0.70401	6.86506	-7.09621	4.11e-07	0.000122462	6.61199
FXYD5	0.703968	0.703968	7.89512	3.52077	0.00192968	0.0146561	-1.49825
MXRA7	0.703355	0.703355	8.80267	4.58835	0.000143964	0.00277207	0.981206
STAP2	-0.703334	0.703334	8.51168	-3.9259	0.00072448	0.00757515	-0.567096
IGKV2OR22-4	0.703188	0.703188	5.28377	2.21464	0.0374698	0.110246	-4.23426
ACSS2	-0.702999	0.702999	9.65902	-4.52856	0.000166563	0.00301622	0.841076
ATP6V0D2	-0.70282	0.70282	5.7297	-2.38623	0.0260735	0.085243	-3.91104
CHPF	0.7027	0.7027	7.82573	6.95091	5.66e-07	0.000146601	6.30626
FAM162A	-0.702599	0.702599	8.19491	-3.19362	0.00420138	0.0243918	-2.23115
B3GALT5-AS1	0.702427	0.702427	7.15176	1.34589	0.192071	0.349289	-5.60221
TST	-0.702115	0.702115	10.6945	-4.5061	0.000175944	0.00311025	0.788439
ADGRA3	-0.702114	0.702114	8.59756	-2.73621	0.0120682	0.049973	-3.21096
KIF16B	-0.702043	0.702043	7.91377	-6.88291	6.58e-07	0.000151423	6.16212
FKBP10	0.701737	0.701737	7.15233	3.14094	0.00475467	0.0266408	-2.34699
SCARNA6	0.701507	0.701507	8.31198	3.55446	0.00177973	0.0138807	-1.42167
ITGAX	0.70045	0.70045	6.67761	2.15404	0.0424748	0.120459	-4.34485
ZSCAN31	-0.700042	0.700042	5.49627	-3.57135	0.00170889	0.0134452	-1.38319
GJA5	0.699572	0.699572	4.99358	3.60568	0.00157335	0.0127293	-1.30487
GTPBP2	-0.699548	0.699548	8.67588	-6.73467	9.16e-07	0.000183747	5.84565
HINFP	-0.699283	0.699283	7.47818	-6.79839	7.95e-07	0.000170212	5.98207
PYROXD1	-0.699033	0.699033	8.53104	-5.77018	8.41e-06	0.000530287	3.71589
ODC1	0.699014	0.699014	9.62718	3.41019	0.00251436	0.0173239	-1.74833
NCF2	0.698952	0.698952	6.5225	1.90558	0.0698807	0.171125	-4.77678
LILRA1	0.698862	0.698862	6.00822	2.5127	0.0198252	0.0704344	-3.66393
SNX13	-0.698682	0.698682	8.55419	-6.64899	1.11e-06	0.000203261	5.66136
PSORS1C3	-0.697997	0.697997	4.88582	-3.19106	0.00422672	0.0244862	-2.23679
PLXNA2	-0.697843	0.697843	7.92208	-4.49121	0.000182452	0.00318463	0.753549
SHISA5	0.697542	0.697542	9.85858	5.24883	2.91e-05	0.00109811	2.52137
FIBIN	0.697467	0.697467	5.27781	2.18179	0.0401121	0.115921	-4.29445
SLC6A4	-0.697192	0.697192	5.33695	-3.36725	0.0027853	0.0185401	-1.84483
MIR21	0.69715	0.69715	8.22442	1.79369	0.0866466	0.198009	-4.95911
SRSF5	-0.696898	0.696898	8.46901	-5.887	6.39e-06	0.000466298	3.97987
CD177	-0.696733	0.696733	11.5948	-2.08642	0.0487672	0.132466	-4.46591
PLN	0.696445	0.696445	5.18623	2.72717	0.0123161	0.0506262	-3.22964
ITGB2	0.69634	0.69634	7.96775	1.96832	0.0617837	0.15667	-4.67113
TMT1A	-0.694677	0.694677	8.32448	-3.75323	0.00110166	0.0100128	-0.966393
CST7	0.694469	0.694469	7.68576	2.98622	0.00681747	0.034053	-2.68307
ZFP3	-0.693465	0.693465	7.12377	-4.29941	0.0002914	0.00425213	0.304195
PCDH17	0.693237	0.693237	6.30763	4.42407	0.000214935	0.0035617	0.59621
SVOPL	-0.693099	0.693099	5.2384	-3.91157	0.00075018	0.00774868	-0.600353
GLS	-0.693047	0.693047	8.28502	-6.27595	2.59e-06	0.000299995	4.84737
TMEM72	-0.69291	0.69291	7.89414	-2.69757	0.0131631	0.0529867	-3.29064
IER3	0.692817	0.692817	8.96457	2.72503	0.0123757	0.0507161	-3.23406
ATP2B4	0.69276	0.69276	7.80146	4.24908	0.0003295	0.00458559	0.186404
ACKR4	0.692723	0.692723	7.03471	1.4145	0.171239	0.322373	-5.51334
S100A11	0.692628	0.692628	9.64915	3.85108	0.000868941	0.00846096	-0.74047
AIFM3	-0.692582	0.692582	7.57904	-3.4388	0.00234828	0.0166419	-1.68383
FBLN5	0.692126	0.692126	7.17079	3.19428	0.00419478	0.0243724	-2.22968
ADCY10P1	-0.69121	0.69121	4.50975	-4.03802	0.000551409	0.00633432	-0.306412
SNORA38	0.691095	0.691095	6.72079	2.72171	0.0124683	0.050985	-3.24091
HNMT	-0.690655	0.690655	7.44516	-4.58553	0.000144957	0.00278697	0.974595
CENPT	-0.690503	0.690503	6.89876	-8.14954	4.39e-08	3.6e-05	8.73543
FOXA2	0.690302	0.690302	7.69201	5.45495	1.78e-05	0.00083029	2.99657
CD5	0.690261	0.690261	7.0055	3.23262	0.00383239	0.0229566	-2.14495
LEFTY1	0.690236	0.690236	8.45312	5.39055	2.07e-05	0.000904548	2.84848
MAGI1	-0.690058	0.690058	8.0497	-5.26841	2.77e-05	0.00106418	2.56667
SEMA4A	0.689988	0.689988	6.9891	3.242	0.00374846	0.0226047	-2.12417
NAP1L2	-0.689856	0.689856	4.40116	-5.70748	9.75e-06	0.000570002	3.57362
ERG	0.689682	0.689682	5.88716	3.29296	0.0033228	0.0208585	-2.01092
ABRACL	-0.689468	0.689468	7.76584	-5.09205	4.24e-05	0.00134864	2.15779
ST6GAL1	0.689167	0.689167	9.6858	5.08571	4.3e-05	0.00135029	2.14304
CHN2	-0.688809	0.688809	8.22919	-3.50885	0.00198568	0.014931	-1.52531
IFITM1	0.688799	0.688799	9.72248	2.74628	0.0117971	0.0493218	-3.19009
QSOX1	0.68855	0.68855	9.84707	4.17252	0.000397209	0.00515333	0.00738152
OASL	-0.688411	0.688411	6.69642	-3.0474	0.00591539	0.0308224	-2.55095
TUBA1A	0.687816	0.687816	7.90809	3.93656	0.000705937	0.00745524	-0.542355
LOC100128288	-0.68767	0.68767	5.83365	-4.48169	0.000186742	0.00323851	0.731228
PSAT1	0.687319	0.687319	5.90422	2.38141	0.026344	0.0858594	-3.92031
PALM2AKAP2	0.686904	0.686904	6.41716	4.29997	0.000290999	0.00425213	0.305514
PALMD	0.685899	0.685899	5.55997	3.28069	0.00342073	0.0212959	-2.03823
SATB2	-0.685807	0.685807	10.9234	-3.60073	0.00159224	0.0128325	-1.31618
IP6K2	-0.685776	0.685776	7.59348	-5.71036	9.68e-06	0.000569238	3.58015
MOCS1	-0.685706	0.685706	6.46361	-4.45192	0.000200814	0.00340426	0.661457
P2RY14	0.684797	0.684797	6.9241	2.89713	0.00837044	0.0391736	-2.87349
CARD11	0.684276	0.684276	6.34295	2.97845	0.00694102	0.034542	-2.69976
ARL14	-0.68423	0.68423	7.47774	-4.23884	0.000337839	0.00465728	0.162452
RAB31	0.68402	0.68402	9.00167	1.85217	0.0774925	0.183634	-4.86481
GPX7	0.683695	0.683695	7.53886	2.39424	0.0256287	0.0841685	-3.89559
SMARCA1	0.683647	0.683647	5.90011	5.20318	3.24e-05	0.00116328	2.41568
CLDN12	0.683321	0.683321	9.55087	4.12087	0.000450551	0.00561172	-0.113228
KLHL6	0.683057	0.683057	7.23418	2.14463	0.0433044	0.122169	-4.36185
EML1	0.682533	0.682533	6.16301	3.82178	0.000932998	0.00884705	-0.808231
IQSEC1	0.682524	0.682524	7.49162	4.55435	0.000156408	0.00289915	0.901526
ANKH	-0.682233	0.682233	8.63494	-3.67555	0.00132935	0.0113934	-1.14495
ANKDD1B	-0.681969	0.681969	5.31373	-3.98435	0.000628428	0.00692515	-0.431325
VSIG10	-0.681398	0.681398	7.83381	-4.24045	0.000336516	0.00465356	0.166212
DEFA5	0.681377	0.681377	5.98818	1.091	0.2871	0.45922	-5.89885
ARID5B	0.681175	0.681175	8.082	5.23258	3.02e-05	0.00112064	2.48377
CCN4	0.680914	0.680914	6.28791	3.49239	0.00206563	0.015374	-1.56264
GBA2	-0.680775	0.680775	9.02688	-6.09489	3.94e-06	0.000363204	4.44579
LILRA5	0.680768	0.680768	5.43909	1.92699	0.0670185	0.166058	-4.741
PTPRCAP	0.680236	0.680236	8.24957	2.81618	0.0100701	0.0443426	-3.04434
SLC5A12	-0.679873	0.679873	5.07549	-5.56384	1.37e-05	0.000712855	3.24615
ACP3	0.679753	0.679753	7.13417	2.3029	0.0311368	0.0965235	-4.06982
AQP1	0.679618	0.679618	8.03936	5.08649	4.3e-05	0.00134998	2.14487
CMAS	-0.679571	0.679571	9.08469	-7.68224	1.16e-07	6.45e-05	7.81378
DOCK1	-0.679515	0.679515	8.32143	-5.58797	1.29e-05	0.000688889	3.3013
SLAMF7	0.679317	0.679317	7.34664	1.59627	0.12472	0.256446	-5.26052
APOL3	0.679065	0.679065	6.07612	3.63321	0.00147236	0.0121493	-1.24194
DGKD	-0.678437	0.678437	9.09573	-5.87521	6.57e-06	0.000469072	3.9533
SULT1C2	0.67832	0.67832	5.701	1.48637	0.151399	0.295722	-5.41633
ZNF845	-0.678206	0.678206	7.43691	-6.50378	1.54e-06	0.000225105	5.3467
MRGPRF	0.677805	0.677805	5.99727	4.56463	0.000152537	0.00286867	0.925608
CATSPERB	0.677501	0.677501	5.91217	2.10271	0.0471794	0.129458	-4.43698
C2CD5	-0.677479	0.677479	8.77159	-6.51554	1.5e-06	0.000225105	5.37229
SDC3	0.67725	0.67725	7.2184	3.83782	0.000897375	0.00861764	-0.771149
TIFA	0.67719	0.67719	6.10076	3.23623	0.00379987	0.0228328	-2.13695
COTL1	0.676989	0.676989	8.65229	5.1107	4.05e-05	0.00131077	2.20112
NPY6R	-0.676693	0.676693	8.07282	-1.45393	0.16011	0.307575	-5.46061
GPR174	0.676501	0.676501	6.66728	2.35191	0.028059	0.0896175	-3.97684
ZNF844	-0.676285	0.676285	5.8186	-3.88878	0.000792898	0.00798873	-0.653172
TTC28	0.67586	0.67586	6.17359	5.25522	2.86e-05	0.00108573	2.53616
FCGR3A	0.6758	0.6758	5.65009	2.39506	0.025584	0.0840657	-3.89402
NIPSNAP3A	-0.675566	0.675566	8.21922	-5.44802	1.8e-05	0.00083995	2.98066
AEBP1	0.674933	0.674933	7.86941	4.23721	0.000339188	0.00466377	0.158635
CD2	0.674917	0.674917	6.58204	3.89073	0.00078916	0.00797665	-0.648666
PLCB1	0.674881	0.674881	6.29924	3.79617	0.000992781	0.009274	-0.867369
NPSR1	0.674468	0.674468	5.18526	2.77147	0.0111446	0.0474238	-3.13776
CDHR5	-0.674321	0.674321	9.70156	-3.45725	0.00224695	0.0161854	-1.64217
PLK2	0.673964	0.673964	6.46678	4.41631	0.000219047	0.0035858	0.578019
MYCT1	0.673743	0.673743	5.54297	3.86081	0.000848668	0.00832375	-0.717972
APBB3	-0.673313	0.673313	6.92425	-8.04608	5.44e-08	4.05e-05	8.5342
CALHM5	0.673218	0.673218	5.5304	3.43154	0.00238935	0.0167996	-1.7002
CCR6	0.672982	0.672982	5.61855	2.47599	0.0214778	0.0744114	-3.73638
DSG3	0.672851	0.672851	5.39119	1.95793	0.0630638	0.159082	-4.68878
SEC22C	0.672838	0.672838	6.78946	3.90904	0.000754802	0.00777103	-0.606212
ATP8A1	-0.672319	0.672319	8.27335	-3.67472	0.001332	0.0113934	-1.14684
SNORD116-1	0.671771	0.671771	8.4156	2.35768	0.0277157	0.0889122	-3.96581
ZDHHC23	-0.671462	0.671462	8.30307	-3.88968	0.000791182	0.00798424	-0.651105
FAM184B	-0.670794	0.670794	5.93407	-7.97119	6.35e-08	4.28e-05	8.38754
CD52	0.670552	0.670552	8.33631	1.95606	0.063297	0.159563	-4.69195
MT1X	-0.67046	0.67046	9.23907	-2.24574	0.0351153	0.105307	-4.17677
PREX1	0.670399	0.670399	7.43397	2.85298	0.00926016	0.0419724	-2.96693
RAB23	0.670148	0.670148	6.18519	3.74168	0.0011329	0.0101842	-0.992983
ZNF326	-0.670006	0.670006	7.80021	-5.13684	3.81e-05	0.0012697	2.26182
SLA	0.669918	0.669918	6.42215	2.29319	0.0317819	0.0978954	-4.0881
MCTP1	0.669564	0.669564	6.32062	2.70003	0.0130907	0.0528082	-3.28559
MT1P3	-0.669431	0.669431	8.17875	-2.6214	0.0156017	0.0595844	-3.44609
LRRC1	-0.669263	0.669263	8.26306	-5.96868	5.28e-06	0.000430548	4.16354
FCER2	0.669209	0.669209	6.08512	1.48118	0.152767	0.297709	-5.42347
PTPN13	0.669055	0.669055	5.65703	3.11329	0.00507274	0.0277975	-2.40752
NT5DC3	0.66893	0.66893	7.08358	3.08397	0.00543239	0.0290513	-2.4715
PML	0.668551	0.668551	7.25264	4.48994	0.000183018	0.00318861	0.750573
SNORD59A	-0.668051	0.668051	4.83507	-3.98402	0.000628924	0.00692515	-0.432079
PPP1R16B	0.667876	0.667876	7.36405	2.47949	0.0213149	0.0740521	-3.7295
BCL3	0.66786	0.66786	9.43643	3.84716	0.000877261	0.00850244	-0.74955
CNKSR3	-0.667321	0.667321	6.9935	-2.47369	0.0215856	0.0746623	-3.74091
IFI44	0.667029	0.667029	4.98011	3.36448	0.00280369	0.0186165	-1.85103
ROCK1P1	-0.666908	0.666908	4.66301	-3.40753	0.00253032	0.0173894	-1.7543
IGBP1P1	-0.666825	0.666825	4.64068	-5.22368	3.09e-05	0.00113687	2.46317
RPSA2	-0.666603	0.666603	5.5469	-3.87073	0.000828445	0.00818931	-0.694984
SLC35D1	-0.666168	0.666168	8.34031	-4.39518	0.000230644	0.00370032	0.528499
NBEAL1	-0.666145	0.666145	8.4811	-3.0401	0.00601673	0.031194	-2.56678
SLC35D2	-0.665687	0.665687	9.47545	-5.29044	2.63e-05	0.00103959	2.61757
NT5C2	-0.664873	0.664873	9.5814	-6.20377	3.06e-06	0.00032075	4.68776
SNORA38B	0.664827	0.664827	10.5018	3.54031	0.00184126	0.0141962	-1.45385
CHST15	0.664465	0.664465	7.26496	2.14177	0.0435591	0.12263	-4.367
GPT	-0.664425	0.664425	7.62389	-4.72626	0.000102893	0.0022927	1.30419
EDN3	-0.663924	0.663924	8.61979	-2.85167	0.00928789	0.0420505	-2.9697
PRKAA2	0.66354	0.66354	7.23674	1.98174	0.0601634	0.153865	-4.64822
CAV2	0.663442	0.663442	6.84948	3.7162	0.00120494	0.0106142	-1.0516
TMEM71	0.663388	0.663388	5.25357	3.13987	0.00476665	0.0266867	-2.34934
HSDL2	-0.662656	0.662656	8.02758	-5.07343	4.43e-05	0.00137065	2.11449
TCP11L2	-0.66249	0.66249	8.09964	-3.24868	0.00368978	0.0224085	-2.10935
CPEB3	-0.662335	0.662335	6.80762	-5.05175	4.67e-05	0.00142847	2.06406
CD53	0.662261	0.662261	8.9253	1.60112	0.12364	0.25492	-5.25344
ITGA2	0.662055	0.662055	8.80585	2.87632	0.00877914	0.0404931	-2.91761
HIGD1A	-0.662044	0.662044	9.76963	-5.53313	1.47e-05	0.000738783	3.17587
ADAMTSL1	-0.661853	0.661853	6.14122	-2.63353	0.0151869	0.0586178	-3.42149
RERG	0.661797	0.661797	5.5647	4.07299	0.000506353	0.00601087	-0.224919
GP1BA	0.661136	0.661136	5.434	2.8628	0.00905466	0.0412792	-2.94619
CDKL1	-0.661066	0.661066	6.04687	-4.40727	0.000223933	0.00363597	0.556843
SEMA6A	-0.659759	0.659759	9.20425	-3.06836	0.0056337	0.0297982	-2.50545
ABCC3	-0.659471	0.659471	9.33878	-6.54906	1.39e-06	0.000223812	5.44512
OR14I1	-0.659235	0.659235	5.24265	-6.41574	1.88e-06	0.000248338	5.15454
SLC45A2	-0.659052	0.659052	4.81712	-3.43301	0.002381	0.0167854	-1.6969
RPS6KA2	0.658825	0.658825	6.98051	3.39463	0.0026094	0.0177452	-1.78333
SEPTIN7P13	-0.658417	0.658417	6.56967	-3.4072	0.00253231	0.017392	-1.75504
FCRL3	0.658402	0.658402	5.83815	1.6337	0.116579	0.244862	-5.20546
EFNA3	0.658051	0.658051	7.5029	4.19619	0.000374908	0.00498758	0.0627146
SSTR2	-0.657925	0.657925	6.39153	-6.25591	2.72e-06	0.000306611	4.80311
DOCK11	0.657875	0.657875	7.02308	2.31114	0.0305985	0.0955098	-4.05427
RNFT1	-0.657828	0.657828	8.59869	-4.98495	5.49e-05	0.00156955	1.90852
TPK1	0.657796	0.657796	6.32122	2.65059	0.0146208	0.0570637	-3.38678
GMPR	0.65749	0.65749	6.84694	2.12108	0.0454446	0.126387	-4.40418
COBL	-0.657482	0.657482	7.53375	-3.53006	0.00188715	0.0144319	-1.47716
HRCT1	-0.657299	0.657299	7.45991	-2.77477	0.0110618	0.0471631	-3.13089
TNFRSF17	0.657244	0.657244	5.76952	1.77442	0.0898613	0.203236	-4.9897
GFPT2	0.656925	0.656925	5.3905	2.83699	0.00960413	0.04294	-3.00062
TIGIT	0.656849	0.656849	5.68033	2.88523	0.00860192	0.039933	-2.89874
GRK3	0.655912	0.655912	6.13931	2.49799	0.020473	0.072021	-3.69305
EGR3	0.65573	0.65573	5.88282	3.4699	0.00217996	0.0158911	-1.61357
MRPS36	-0.655662	0.655662	7.0707	-6.45024	1.74e-06	0.000239626	5.22995
ADCY6	-0.655459	0.655459	8.54124	-5.01973	5.05e-05	0.00148606	1.98954
CYRIA	0.655424	0.655424	7.04803	2.01147	0.056707	0.147385	-4.59708
PRKAB2	-0.655218	0.655218	7.80321	-3.59624	0.00160953	0.0129277	-1.32642
NIPAL1	-0.655044	0.655044	8.88408	-3.16235	0.00452175	0.0257263	-2.29998
LY96	0.654931	0.654931	6.47549	1.80774	0.0843658	0.194375	-4.93666
SELENOM	0.654617	0.654617	8.23393	4.77658	9.1e-05	0.00212764	1.42195
HOXB6	-0.654401	0.654401	7.30952	-3.41105	0.00250917	0.0173071	-1.74638
BSG	-0.654054	0.654054	10.6317	-4.6565	0.000121937	0.00252281	1.14085
BACH2	0.654007	0.654007	5.57514	2.56547	0.0176567	0.0649204	-3.55879
ZNF137P	-0.653863	0.653863	4.85391	-3.97121	0.000648845	0.00707834	-0.461855
CLCN4	0.653518	0.653518	5.22104	4.32884	0.000271197	0.0040997	0.373101
ST3GAL5	0.653301	0.653301	6.5522	3.56146	0.00175003	0.0137171	-1.40573
C6orf136	-0.653297	0.653297	7.89691	-4.59451	0.000141818	0.002753	0.995641
OTUB2	0.653227	0.653227	6.33913	3.72557	0.00117793	0.010434	-1.03005
AKR1C1	-0.653137	0.653137	7.28353	-2.95426	0.00733985	0.0359106	-2.75166
CSRNP1	0.652757	0.652757	6.34547	4.52222	0.000169157	0.00303693	0.826231
IL3RA	0.652754	0.652754	6.13445	3.25412	0.00364265	0.0222297	-2.09728
MAP3K20	0.652445	0.652445	5.98527	3.60954	0.00155881	0.0126333	-1.29606
PMFBP1	-0.652397	0.652397	5.51012	-4.23363	0.000342164	0.00469443	0.150262
TNFAIP8	0.652389	0.652389	6.5846	3.04105	0.00600343	0.0311593	-2.56471
GYG2	0.652141	0.652141	6.58009	2.99731	0.00664464	0.0334646	-2.65919
LILRB2	0.65193	0.65193	6.72681	2.13286	0.0443623	0.12404	-4.38304
PRR15L	-0.651856	0.651856	9.83672	-3.99479	0.000612641	0.00680548	-0.407026
ACAA1	-0.651726	0.651726	8.05186	-4.70572	0.000108164	0.00237093	1.25613
ERBIN	-0.651531	0.651531	10.0261	-5.04271	4.78e-05	0.00144281	2.04304
BOC	0.651257	0.651257	5.70627	4.70519	0.000108304	0.00237124	1.25489
MID2	0.651243	0.651243	6.50877	5.02471	4.99e-05	0.00148338	2.00114
IFNG	0.650976	0.650976	4.27413	3.253	0.00365228	0.022274	-2.09976
MIER1	-0.650659	0.650659	8.71959	-6.22734	2.9e-06	0.000316815	4.73996
G0S2	0.650633	0.650633	7.63419	2.44327	0.0230582	0.0782788	-3.80047
ZNF350	-0.650585	0.650585	6.76612	-4.74106	9.93e-05	0.0022605	1.33884
SNORA74A	0.650514	0.650514	5.92666	3.31239	0.00317313	0.0202289	-1.96758
EMP3	0.650406	0.650406	7.80102	2.49875	0.0204387	0.0719362	-3.69153
RNU4-1	0.650324	0.650324	11.712	1.94736	0.0643911	0.161436	-4.70668
YBX2	-0.650298	0.650298	8.44688	-6.11589	3.75e-06	0.000353667	4.49257
FSCN1	0.65026	0.65026	7.83543	3.72521	0.00117895	0.010434	-1.03087
PRR5L	-0.650184	0.650184	8.52703	-3.51748	0.00194498	0.0147189	-1.50572
SLC15A3	0.649879	0.649879	6.95564	2.94656	0.00747122	0.036299	-2.76813
PIK3AP1	0.649541	0.649541	7.85214	2.86059	0.00910053	0.0414482	-2.95086
ALDH1L2	0.649313	0.649313	5.69818	2.61505	0.0158232	0.0601136	-3.45895
SACS	0.649277	0.649277	5.5414	2.77471	0.0110634	0.0471631	-3.13102
CHKA	-0.648566	0.648566	8.22756	-5.12501	3.92e-05	0.0012882	2.23435
SLC2A14	0.648564	0.648564	5.98021	3.98409	0.000628819	0.00692515	-0.431918
AKIRIN2	0.648189	0.648189	8.59247	4.69758	0.000110331	0.00239106	1.23705
PROK2	0.648083	0.648083	6.38015	2.11533	0.0459809	0.127245	-4.41446
ADARB1	0.648023	0.648023	6.54497	4.6942	0.000111242	0.00239934	1.22914
FMNL3	0.647878	0.647878	6.6263	2.75206	0.0116445	0.048876	-3.17812
HAS3	-0.647788	0.647788	6.50403	-4.67139	0.000117593	0.00246578	1.17574
MT1A	-0.64778	0.64778	9.04304	-2.88183	0.00866902	0.0401292	-2.90593
PKDCC	-0.647763	0.647763	8.00072	-2.37766	0.0265568	0.0864036	-3.92752
LDLR	0.647711	0.647711	9.79221	2.96186	0.00721214	0.0354144	-2.73536
CYP39A1	0.647456	0.647456	5.0465	4.56988	0.000150593	0.00284737	0.937934
PRKCB	0.647243	0.647243	7.49433	2.18712	0.0396726	0.115074	-4.28473
HYCC1	0.647232	0.647232	5.70696	2.67945	0.0137082	0.0546096	-3.32782
CASP1	0.647139	0.647139	7.98202	2.04448	0.0530783	0.140621	-4.53971
CES3	-0.647117	0.647117	8.9682	-2.97521	0.00699329	0.0347288	-2.70673
UBE2A	-0.646955	0.646955	9.08132	-5.84692	7.02e-06	0.000479693	3.88948
CD80	0.646948	0.646948	5.41638	2.05305	0.0521708	0.13881	-4.52471
TEK	0.646893	0.646893	6.12465	2.90682	0.00818627	0.0385895	-2.85288
PCCA	-0.646515	0.646515	8.36203	-4.62154	0.000132776	0.00264304	1.05897
PPY	0.64646	0.64646	5.1983	2.35417	0.0279238	0.0893554	-3.97251
XDH	0.646422	0.646422	8.58918	2.03962	0.0535994	0.141632	-4.5482
MIR30E	-0.646308	0.646308	4.88953	-4.69486	0.000111062	0.00239934	1.2307
PTAFR	0.646202	0.646202	6.73603	3.50181	0.00201949	0.0151069	-1.54128
RAMP2	0.645777	0.645777	6.50115	4.23365	0.000342146	0.00469443	0.150314
BASP1	0.645764	0.645764	8.63562	2.61694	0.0157569	0.0599583	-3.45511
RGS1	0.645538	0.645538	5.36201	2.14709	0.0430864	0.121752	-4.35741
TRIM3	-0.645253	0.645253	6.82879	-6.59928	1.24e-06	0.000214848	5.55395
PRELP	0.645226	0.645226	6.6471	2.91068	0.00811407	0.0383931	-2.84467
CR1L	0.645056	0.645056	4.30309	2.919	0.00796053	0.0378936	-2.82697
AHNAK2	0.645033	0.645033	5.66686	4.00732	0.000594232	0.00668768	-0.377881
SEMA4D	0.645032	0.645032	7.28238	2.78203	0.0108815	0.0466517	-3.11577
GMFG	0.645016	0.645016	7.42208	1.98557	0.059708	0.153053	-4.64166
CRIP2	0.644989	0.644989	7.67607	4.18162	0.000388485	0.00508608	0.0286481
CD3D	0.644619	0.644619	6.98214	3.02465	0.0062366	0.0320169	-2.60021
IL17RB	-0.644521	0.644521	6.80167	-3.41284	0.00249847	0.0172916	-1.74235
BTNL3	-0.644195	0.644195	8.73578	-0.995127	0.330514	0.504596	-5.9961
DMTF1	-0.644125	0.644125	7.88199	-5.1999	3.27e-05	0.00116471	2.40808
BTLA	0.644062	0.644062	5.31312	2.16927	0.0411636	0.118181	-4.31725
POU2AF2	-0.64314	0.64314	5.66163	-2.9331	0.00770642	0.0370691	-2.79689
GMFB	-0.64293	0.64293	8.02649	-6.65654	1.09e-06	0.000202316	5.67764
SAMD9L	0.64289	0.64289	8.80525	1.95141	0.0638806	0.160549	-4.69984
PIP5K1B	-0.642635	0.642635	8.34999	-4.46104	0.000196391	0.00334795	0.682843
E2F5	0.642589	0.642589	7.29363	3.43683	0.00235934	0.0166889	-1.68827
PHF7	-0.642225	0.642225	6.46294	-5.21242	3.17e-05	0.00115232	2.43708
TRIB1	0.642173	0.642173	9.22985	4.11993	0.000451585	0.00561743	-0.115423
MAP4K1	0.641702	0.641702	6.24737	2.65913	0.0143451	0.0563666	-3.36937
ETS1	0.641618	0.641618	8.09516	2.8233	0.00990815	0.0438906	-3.02939
CEBPB	0.641292	0.641292	7.94384	3.50068	0.00202496	0.0151281	-1.54384
ZNF252P	-0.640911	0.640911	6.82633	-5.98076	5.14e-06	0.000421909	4.19064
SEC14L1	0.640879	0.640879	7.74601	3.1041	0.00518289	0.0281807	-2.42759
CTLA4	0.640875	0.640875	5.22529	2.44579	0.0229328	0.0779886	-3.79556
ADHFE1	-0.640493	0.640493	5.49648	-3.40369	0.0025536	0.0174984	-1.76294
ASAP1	0.640128	0.640128	7.84566	2.55188	0.0181929	0.0663256	-3.58598
PRPS1	0.639963	0.639963	7.00621	2.70931	0.0128209	0.0520092	-3.26649
PPARD	-0.639131	0.639131	8.43438	-3.93098	0.00071559	0.00752347	-0.555316
SEPHS2	-0.638907	0.638907	9.10434	-4.8892	6.93e-05	0.00180002	1.68515
OSBPL11	-0.638806	0.638806	7.21047	-6.40451	1.93e-06	0.000251266	5.12995
NEBL	0.638734	0.638734	6.99029	5.19945	3.27e-05	0.00116471	2.40703
AZIN2	-0.63864	0.63864	6.24361	-4.75635	9.56e-05	0.0022015	1.37463
TSEN2	-0.63843	0.63843	6.47967	-7.4921	1.74e-07	7.83e-05	7.42942
ARHGAP25	0.638271	0.638271	6.38489	2.29124	0.0319131	0.0981874	-4.09177
LIX1L	0.63826	0.63826	8.00792	5.60643	1.24e-05	0.000674643	3.34344
CD79B	0.638247	0.638247	6.75959	2.12102	0.04545	0.126387	-4.40428
MAP3K6	0.638213	0.638213	7.3208	5.32048	2.45e-05	0.000997585	2.68696
MT1JP	-0.638083	0.638083	7.17329	-2.62194	0.0155832	0.0595376	-3.445
SH3PXD2B	0.638003	0.638003	7.23469	3.10807	0.00513499	0.0280335	-2.41892
ZNF440	-0.637221	0.637221	6.93223	-3.9952	0.000612042	0.00680283	-0.406091
NCALD	0.637144	0.637144	5.83683	6.39329	1.98e-06	0.000251511	5.10539
TLR6	0.637143	0.637143	6.01747	2.03888	0.0536785	0.141781	-4.54948
AGPAT4	0.637087	0.637087	5.91756	2.79483	0.0105702	0.0457608	-3.08903
ACOX2	-0.636845	0.636845	6.89569	-3.88377	0.000802616	0.00803084	-0.664787
MYL9	0.636543	0.636543	8.58391	2.9822	0.00688122	0.034326	-2.69172
HOXA4	-0.636449	0.636449	5.83854	-4.48796	0.000183905	0.00319814	0.745931
FZD3	0.636349	0.636349	6.09917	3.98037	0.000634549	0.00696674	-0.440582
EHD2	0.636197	0.636197	7.74316	4.00345	0.000599856	0.00673088	-0.38688
GLP2R	-0.635934	0.635934	5.9996	-2.94922	0.00742552	0.0361608	-2.76243
AKAP1	-0.635729	0.635729	9.30967	-4.94986	5.98e-05	0.0016599	1.82671
SLC30A4	-0.635499	0.635499	8.06154	-3.98681	0.00062467	0.00689846	-0.425597
CNGA1	-0.63545	0.63545	4.93611	-2.18317	0.0399978	0.115697	-4.29193
BDH1	-0.635421	0.635421	8.3238	-3.52275	0.00192053	0.0145925	-1.49375
NFKB2	0.635241	0.635241	7.3339	3.24309	0.0037388	0.0225681	-2.12174
BST2	0.634847	0.634847	6.45068	2.48152	0.021221	0.0738757	-3.72551
SPATA25	-0.634701	0.634701	6.14941	-6.29544	2.48e-06	0.000292252	4.89033
MTHFD2	0.634677	0.634677	8.34454	3.23389	0.00382091	0.0229101	-2.14213
LYRM7	-0.634544	0.634544	6.28286	-4.80566	8.48e-05	0.00203446	1.48996
QKI	0.63428	0.63428	6.71529	3.13415	0.004831	0.0269276	-2.36188
MGST3	-0.634084	0.634084	10.4496	-5.55462	1.4e-05	0.000721188	3.22505
LIPC	-0.633751	0.633751	5.05133	-2.46873	0.0218198	0.0752007	-3.75066
NFATC2	0.633602	0.633602	7.48574	4.57727	0.000147905	0.00282203	0.955242
LILRA6	0.633502	0.633502	5.71835	2.41017	0.0247657	0.0820829	-3.8648
GJB3	0.633285	0.633285	5.80235	4.43252	0.000210548	0.00351393	0.616008
SRI	-0.632616	0.632616	11.0633	-5.36159	2.22e-05	0.000935517	2.78178
ENC1	0.632448	0.632448	7.28332	4.74082	9.93e-05	0.0022605	1.33828
TMEM106A	0.632052	0.632052	7.51262	3.54747	0.00180988	0.0140577	-1.43757
LPCAT3	-0.631871	0.631871	10.7898	-4.21747	0.000355931	0.0048184	0.112471
RBMS3	0.631577	0.631577	6.39931	3.19877	0.00415069	0.0242169	-2.21978
AOAH	-0.631492	0.631492	8.29689	-2.92444	0.00786162	0.0376045	-2.81538
OLFM1	0.631301	0.631301	6.50636	3.72755	0.00117231	0.0103947	-1.0255
LAPTM5	0.631086	0.631086	9.97971	1.84141	0.0791109	0.186292	-4.88232
EGR2	0.630671	0.630671	6.75563	3.51291	0.00196644	0.0148337	-1.5161
COLCA1	-0.630455	0.630455	6.19108	-3.74285	0.00112969	0.0101675	-0.990289
TNFRSF12A	0.630407	0.630407	8.68172	2.9654	0.00715349	0.0352366	-2.72778
UST	0.630269	0.630269	6.03383	4.37504	0.000242267	0.00380021	0.48132
VCAN	0.629957	0.629957	7.24087	1.83573	0.0799771	0.187682	-4.89154
PLA2R1	-0.629905	0.629905	6.80271	-2.74608	0.0118026	0.0493218	-3.19051
NUDT7	-0.629898	0.629898	7.79234	-3.99658	0.000609988	0.00679603	-0.402879
IL1R1	0.629776	0.629776	7.52896	2.39389	0.0256479	0.084173	-3.89626
CDK5RAP3	-0.62942	0.62942	6.87329	-7.08574	4.21e-07	0.000122462	6.59006
ADAT2	-0.629345	0.629345	7.02832	-6.19357	3.14e-06	0.000324773	4.66516
SLC16A2	0.629184	0.629184	6.42501	4.68436	0.000113938	0.00242167	1.20611
ETV1	0.628971	0.628971	5.43111	4.60381	0.000138641	0.00271676	1.01742
PLXND1	0.628827	0.628827	7.199	3.32076	0.00311073	0.0199291	-1.94889
SLC39A2	-0.628788	0.628788	4.86495	-4.23868	0.000337974	0.00465728	0.162069
ZNF57	-0.628625	0.628625	8.02567	-3.71187	0.00121761	0.0106927	-1.06154
SULT1A1	-0.628527	0.628527	6.43997	-4.3894	0.000233919	0.00372748	0.51497
KIAA0040	0.628337	0.628337	7.88977	3.13825	0.00478474	0.0267296	-2.35288
MTM1	-0.628225	0.628225	7.91182	-3.64833	0.00141962	0.011857	-1.20733
FLI1	0.627881	0.627881	6.79313	2.24962	0.034831	0.104654	-4.16956
RNU11	0.627844	0.627844	7.23258	2.50417	0.0201983	0.0713402	-3.68082
LRRN2	-0.627835	0.627835	6.75084	-2.71456	0.0126706	0.0516104	-3.25568
RIPK2	0.627676	0.627676	6.99784	2.90867	0.00815166	0.0385047	-2.84896
HSPA13	0.627519	0.627519	7.29038	2.74175	0.0119184	0.0495608	-3.19949
EFEMP2	0.62748	0.62748	6.99361	4.30444	0.000287845	0.00423257	0.315966
FAM3C	0.627049	0.627049	8.23753	3.68682	0.00129364	0.0111711	-1.11909
IGF2	0.626963	0.626963	5.56026	3.89665	0.000777877	0.00791857	-0.634933
FAM171B	0.626684	0.626684	7.08693	3.0007	0.00659269	0.0332919	-2.65189
AICDA	0.626277	0.626277	5.05206	2.57732	0.017201	0.0637419	-3.535
SLC16A5	-0.626217	0.626217	7.36614	-5.17943	3.43e-05	0.00120344	2.36063
RND3	-0.625866	0.625866	8.22932	-6.53832	1.43e-06	0.000224555	5.4218
KANSL1L	0.625364	0.625364	6.14607	4.13801	0.000432096	0.0054532	-0.0732058
RIOK3	-0.62534	0.62534	9.1988	-4.52272	0.00016895	0.00303693	0.827408
ECHDC2	-0.625162	0.625162	6.92746	-5.05018	4.69e-05	0.00142847	2.06041
NHEJ1	-0.624574	0.624574	7.4777	-4.07497	0.000503914	0.00599703	-0.220303
CD276	0.624531	0.624531	8.03452	4.67153	0.000117554	0.00246578	1.17606
DSE	0.6245	0.6245	6.86563	2.47724	0.0214195	0.0743198	-3.73393
LDHD	-0.6243	0.6243	8.16127	-2.79004	0.0106858	0.0461273	-3.09905
NDUFA5	-0.624055	0.624055	7.11408	-5.45136	1.79e-05	0.000835339	2.98834
CASP5	0.623681	0.623681	9.23245	1.31116	0.203349	0.363245	-5.64577
FNIP2	-0.623483	0.623483	9.31775	-4.8978	6.78e-05	0.00178083	1.70523
LMTK2	-0.623481	0.623481	8.95988	-5.21547	3.15e-05	0.00114831	2.44416
MICA	-0.623404	0.623404	6.74791	-4.83627	7.87e-05	0.00196624	1.56151
MYC	0.623229	0.623229	7.80644	5.0123	5.14e-05	0.00149998	1.97224
FLVCR1	-0.622873	0.622873	7.39208	-3.35584	0.00286194	0.018859	-1.87041
SLCO3A1	0.622644	0.622644	7.80935	3.90518	0.000761916	0.00782526	-0.61516
CENATAC	-0.622418	0.622418	7.25108	-8.19152	4.03e-08	3.6e-05	8.81661
CD3G	0.622331	0.622331	7.45401	2.69133	0.0133483	0.0534925	-3.30345
DKK1	0.622328	0.622328	4.77002	2.37986	0.0264318	0.0860562	-3.92329
PTGDS	0.622141	0.622141	6.92148	3.74289	0.00112959	0.0101675	-0.990203
MXI1	-0.62201	0.62201	8.1118	-4.19507	0.000375932	0.00499255	0.0601035
LRP12	-0.621705	0.621705	6.05191	-3.86783	0.000834318	0.00823057	-0.701718
SCIMP	0.6217	0.6217	6.98487	1.66659	0.109798	0.234538	-5.15625
RILPL2	0.621593	0.621593	6.53551	3.11043	0.00510674	0.0279278	-2.41377
LZIC	-0.621464	0.621464	7.8204	-5.13109	3.86e-05	0.00127835	2.24848
PLA1A	0.621464	0.621464	5.77971	2.28374	0.0324217	0.0993792	-4.10585
DNAJB9	0.621402	0.621402	7.55849	2.8192	0.0100011	0.0441545	-3.038
STX3	-0.62136	0.62136	8.5072	-4.56111	0.00015385	0.00286867	0.917371
ANXA5	0.621269	0.621269	9.46783	2.69036	0.0133775	0.0535866	-3.30545
NCKAP1L	0.621076	0.621076	7.31658	1.7294	0.0977715	0.216231	-5.06019
MT1DP	-0.620796	0.620796	8.69808	-3.09012	0.00535499	0.0287762	-2.4581
ZZEF1	-0.620701	0.620701	8.78191	-5.88006	6.5e-06	0.000469072	3.96424
AIM2	0.620685	0.620685	5.20932	1.9886	0.0593496	0.152435	-4.63646
C1QTNF1	0.620485	0.620485	7.52478	4.84328	7.74e-05	0.00194857	1.57788
BMP7	0.620331	0.620331	5.95808	4.07936	0.000498553	0.00595585	-0.210073
CNST	-0.619718	0.619718	7.1145	-7.06914	4.36e-07	0.000122758	6.55527
TPRG1L	-0.619675	0.619675	9.12329	-4.10222	0.000471515	0.00576427	-0.156741
ANKRD49	-0.619525	0.619525	6.7435	-9.59043	2.62e-09	9.72e-06	11.373
PIGL	-0.619462	0.619462	6.34757	-7.27132	2.81e-07	9.8e-05	6.97641
KLK1	-0.619218	0.619218	9.06465	-3.03201	0.00613083	0.0316203	-2.58428
TSPAN5	0.619052	0.619052	6.22735	3.99936	0.000605862	0.00676205	-0.396396
NAT8	-0.619012	0.619012	5.53943	-4.3534	0.000255414	0.00395304	0.430618
PDIA5	0.618984	0.618984	7.86036	5.76633	8.49e-06	0.000531408	3.70717
SRPX2	0.618867	0.618867	6.27959	2.06643	0.0507807	0.136363	-4.5012
CD19	0.61885	0.61885	6.55385	2.34008	0.0287753	0.091305	-3.99939
SFXN5	-0.618301	0.618301	6.66788	-4.72095	0.000104229	0.00231427	1.29178
AK1	-0.618108	0.618108	7.52362	-3.38364	0.00267868	0.0180536	-1.80804
CYP2R1	-0.617925	0.617925	7.27004	-4.60956	0.00013671	0.00269292	1.0309
SPATS2L	-0.61775	0.61775	9.57066	-4.54075	0.000161682	0.00295741	0.869656
DOCK8	0.6177	0.6177	7.49912	2.05308	0.0521675	0.13881	-4.52466
AGRN	0.617693	0.617693	7.54852	5.27919	2.7e-05	0.00105679	2.59158
MTARC2	-0.617623	0.617623	7.08677	-4.60886	0.000136944	0.0026947	1.02926
ANKRD22	0.61695	0.61695	7.88787	1.91656	0.0684002	0.168573	-4.75847
LGALS1	0.615502	0.615502	9.5101	3.1298	0.00488047	0.027065	-2.37141
DOCK2	0.615279	0.615279	7.28076	1.8385	0.0795543	0.187039	-4.88706
EYA2	-0.615037	0.615037	6.74223	-3.10383	0.00518611	0.0281901	-2.42817
LDOC1	0.614703	0.614703	6.45582	3.94776	0.000686953	0.00732452	-0.516339
BNC2	0.614687	0.614687	6.21422	3.07888	0.00549729	0.0292977	-2.48258
CACNB3	-0.614463	0.614463	8.12743	-6.14082	3.54e-06	0.000344161	4.54805
ABCC5	-0.614306	0.614306	6.60421	-4.14069	0.000429281	0.00543113	-0.0669512
ROR2	0.614294	0.614294	6.31665	5.31531	2.48e-05	0.00100482	2.67502
MGLL	-0.614162	0.614162	8.67651	-4.95431	5.91e-05	0.00165184	1.83708
FMNL1	0.613877	0.613877	7.07519	3.25475	0.00363724	0.0222124	-2.09589
ZNF737	-0.613548	0.613548	8.81415	-3.12894	0.00489023	0.0270975	-2.37328
CYTH4	0.61341	0.61341	7.1719	2.16596	0.0414452	0.118718	-4.32325
EPHB4	0.613366	0.613366	8.01722	5.74975	8.83e-06	0.000540157	3.66958
SECTM1	-0.613212	0.613212	9.17361	-2.51354	0.0197888	0.0703969	-3.66227
CYCS	-0.613207	0.613207	8.94388	-5.20829	3.2e-05	0.00115714	2.42751
FRY	0.613155	0.613155	6.31705	3.35797	0.0028475	0.0187949	-1.86564
UNC5CL	0.612711	0.612711	5.53544	3.30993	0.00319172	0.020313	-1.97307
PLCD3	-0.612514	0.612514	9.64898	-3.47336	0.00216192	0.0157963	-1.60572
GSDMB	-0.61248	0.61248	8.58191	-2.82352	0.00990328	0.0438906	-3.02894
DENND2B	0.612287	0.612287	7.483	7.3762	2.24e-07	8.57e-05	7.19252
CLIP2	-0.612257	0.612257	7.61614	-4.56146	0.00015372	0.00286867	0.918183
TLCD3A	0.612104	0.612104	8.22494	3.3558	0.00286221	0.018859	-1.87049
SELENON	0.612014	0.612014	9.09436	6.36541	2.11e-06	0.000260368	5.04423
CAVIN3	0.611833	0.611833	7.2194	3.44826	0.00229577	0.0163806	-1.66247
NRP2	0.611684	0.611684	5.9185	3.25213	0.00365984	0.0223035	-2.1017
CYP2C18	-0.611572	0.611572	6.52264	-1.70834	0.101672	0.222243	-5.0927
CEP70	-0.611555	0.611555	6.66973	-4.24006	0.000336839	0.00465356	0.165293
LRRFIP2	-0.610915	0.610915	8.50703	-5.85112	6.95e-06	0.000476727	3.89894
RGS7BP	0.610675	0.610675	5.33329	2.89015	0.00850534	0.0396278	-2.88829
FGFR1	0.610295	0.610295	6.52483	4.88975	6.92e-05	0.00180002	1.68645
PXDN	0.610001	0.610001	7.57673	2.00876	0.0570152	0.147921	-4.60177
IGHA1	0.609926	0.609926	12.9138	2.69854	0.0131345	0.0529282	-3.28865
SLC49A4	0.609812	0.609812	9.84671	4.26653	0.000315758	0.00447209	0.227232
LENG8	-0.609534	0.609534	8.5753	-6.89213	6.45e-07	0.000151423	6.1817
TDRD7	-0.609156	0.609156	7.54774	-5.99954	4.92e-06	0.00041189	4.23272
ANOS1	0.609071	0.609071	4.93419	4.2072	0.000364964	0.00489327	0.0884629
CAPN9	-0.608882	0.608882	7.35322	-2.42904	0.0237784	0.0799299	-3.82819
C1orf198	0.608817	0.608817	7.58136	4.32837	0.000271504	0.00410106	0.372013
MAPKAPK5-AS1	-0.608793	0.608793	5.83117	-4.93598	6.18e-05	0.00168441	1.79433
LDLRAD3	0.60839	0.60839	6.95391	4.0446	0.000542638	0.00627948	-0.291087
CLEC4E	0.608177	0.608177	3.88602	2.55287	0.0181531	0.0662415	-3.58399
ZNF577	-0.608126	0.608126	6.09608	-3.17339	0.00440608	0.0252382	-2.27572
IL10RA	0.608103	0.608103	7.41394	1.90712	0.0696708	0.170801	-4.77421
FAM20A	0.608066	0.608066	5.30795	3.2995	0.00327164	0.0206472	-1.99634
ACADSB	-0.607983	0.607983	7.5643	-3.39502	0.002607	0.0177417	-1.78246
ODF2L	-0.607912	0.607912	6.21042	-4.2707	0.000312557	0.00444681	0.236997
TMED6	-0.607592	0.607592	5.60902	-2.53451	0.0189004	0.0682291	-3.62062
SETD7	0.607275	0.607275	8.44935	3.39138	0.00262968	0.0178399	-1.79063
PNISR	-0.607178	0.607178	7.83545	-3.92588	0.000724523	0.00757515	-0.567154
GOLIM4	-0.6071	0.6071	10.3191	-5.53679	1.46e-05	0.00073629	3.18426
LAMA4	0.606768	0.606768	7.23619	2.72361	0.0124152	0.0508449	-3.23699
PXMP2	-0.606733	0.606733	9.70395	-2.17332	0.0408208	0.117519	-4.30988
HADHA	-0.60607	0.60607	9.96224	-5.61523	1.21e-05	0.000665551	3.36354
GABRA2	-0.606019	0.606019	5.79261	-1.57285	0.130052	0.264325	-5.29447
EPHA3	0.60528	0.60528	5.84493	3.22347	0.00391604	0.0233095	-2.16521
TMEM65	-0.604955	0.604955	7.22127	-4.03892	0.000550198	0.00632826	-0.30431
MTCL1	0.604762	0.604762	5.99243	4.31113	0.000283179	0.00420241	0.331635
PKM	0.604628	0.604628	9.979	4.10412	0.000469342	0.00575264	-0.152322
SULT1B1	-0.604453	0.604453	10.2287	-3.9579	0.000670223	0.0072111	-0.492804
SLCO4C1	-0.604433	0.604433	6.27685	-2.31451	0.0303809	0.0949926	-4.0479
SEPSECS	-0.604277	0.604277	7.37774	-4.1466	0.000423141	0.00537146	-0.0531611
IFIT3	0.604142	0.604142	6.12596	2.80477	0.0103345	0.0450647	-3.06824
TTPA	-0.603893	0.603893	6.48104	-3.01781	0.00633632	0.0323351	-2.61498
TRANK1	-0.603763	0.603763	8.51873	-3.15449	0.00460596	0.0260745	-2.31725
ROCK2	-0.603659	0.603659	9.7657	-8.57433	1.86e-08	2.39e-05	9.54483
PHYKPL	-0.603441	0.603441	8.39341	-6.18476	3.2e-06	0.000327839	4.64563
JAM3	0.603367	0.603367	6.52114	3.11526	0.00504943	0.0277028	-2.40322
RIDA	-0.603227	0.603227	7.5828	-4.36513	0.000248201	0.00387	0.458102
ESAM	0.602902	0.602902	6.16071	6.35466	2.17e-06	0.000265115	5.02063
FAM219B	-0.602446	0.602446	6.55225	-4.97452	5.63e-05	0.00159899	1.88422
PTPRS	0.602396	0.602396	6.91028	4.73829	9.99e-05	0.00226344	1.33235
GORAB	-0.601853	0.601853	7.02176	-7.43009	1.99e-07	8.35e-05	7.30292
TIA1	-0.601525	0.601525	8.54029	-3.43007	0.0023978	0.016827	-1.70353
PRELID2	-0.601294	0.601294	7.66792	-4.14135	0.000428592	0.00542605	-0.0654129
RUBCNL	0.601149	0.601149	7.16745	4.28905	0.000298864	0.00432047	0.279944
AGMAT	-0.600972	0.600972	8.40753	-4.57476	0.000148814	0.00282507	0.949355
PAPSS2	-0.600849	0.600849	11.0761	-5.78257	8.17e-06	0.000523808	3.74397
TMCC3	-0.600764	0.600764	9.43581	-3.92112	0.000732959	0.00762528	-0.578198
HIP1	0.600679	0.600679	6.5502	3.45321	0.00226874	0.0162481	-1.65129
RNF144B	0.600677	0.600677	6.79936	3.4478	0.00229832	0.0163926	-1.66352
TESK2	-0.600582	0.600582	7.58869	-3.36348	0.00281039	0.0186413	-1.85328
DUSP7	0.600494	0.600494	9.12118	3.36202	0.00282021	0.0186791	-1.85656
KITLG	-0.600442	0.600442	6.63356	-4.39473	0.000230897	0.00370122	0.527449
PLEKHG2	0.600425	0.600425	6.95008	3.42464	0.0024291	0.0169621	-1.71578
MAGI3	-0.600269	0.600269	8.088	-3.69394	0.00127157	0.011031	-1.10274
EFHC1	-0.600207	0.600207	6.30778	-4.44339	0.000205034	0.00345099	0.641485
B3GNT9	0.599983	0.599983	6.56568	6.52172	1.48e-06	0.000225105	5.38572
DDX60L	-0.599916	0.599916	7.73575	-2.75629	0.0115337	0.0485129	-3.16932
ABCD2	0.5999	0.5999	5.44221	2.95036	0.00740609	0.0360949	-2.76
MSI2	0.599892	0.599892	7.40534	6.24144	2.81e-06	0.0003151	4.77114
LILRB1	0.599889	0.599889	6.87304	2.3514	0.0280897	0.0896729	-3.97781
ART3	0.599887	0.599887	4.58098	2.61363	0.0158731	0.0602666	-3.46181
ARHGEF6	0.599784	0.599784	6.54361	2.39604	0.0255299	0.0839464	-3.89212
F2R	0.599691	0.599691	6.84501	1.95316	0.0636608	0.160073	-4.69688
C4orf33	-0.599525	0.599525	7.3547	-3.40628	0.00253789	0.0174043	-1.75712
OFD1	-0.59952	0.59952	6.89995	-3.75194	0.0011051	0.01003	-0.969362
APBB1IP	0.599382	0.599382	6.42212	2.2574	0.0342681	0.103316	-4.15509
SPCS3	0.5992	0.5992	8.8105	3.75536	0.001096	0.0099858	-0.96149
BTK	0.599158	0.599158	5.61596	1.84075	0.0792112	0.186465	-4.8834
SPDYE7P	-0.599028	0.599028	5.00298	-5.15066	3.68e-05	0.00125169	2.29391
SDR42E1	-0.598842	0.598842	6.79822	-4.14977	0.00041988	0.00533746	-0.0457572
TNFRSF11B	0.598739	0.598739	6.34732	1.9812	0.0602281	0.153906	-4.64914
SLC37A2	-0.598638	0.598638	6.78344	-1.15842	0.259138	0.428509	-5.82568
MCUB	0.598479	0.598479	6.5837	2.33776	0.0289174	0.0916326	-4.0038
VSNL1	0.598325	0.598325	7.29543	1.6312	0.117108	0.245562	-5.20916
ME2	-0.598198	0.598198	9.44989	-6.12248	3.7e-06	0.00035006	4.50725
TNF	0.598143	0.598143	6.06079	3.84839	0.000874649	0.00848585	-0.746708
IGHV1OR21-1	0.597904	0.597904	5.57799	3.26006	0.00359186	0.022017	-2.08409
CLIP3	0.597645	0.597645	7.2038	5.68528	1.03e-05	0.000590304	3.52314
CD9	-0.596692	0.596692	10.5493	-5.53766	1.46e-05	0.00073629	3.18625
COL6A1	0.59669	0.59669	8.56872	2.99163	0.00673261	0.0337543	-2.67142
WDFY4	0.596418	0.596418	6.77283	2.22643	0.0365612	0.108195	-4.21254
HADHB	-0.596304	0.596304	9.274	-5.85823	6.84e-06	0.000472274	3.915
TPRG1	0.596254	0.596254	4.92124	4.12073	0.0004507	0.00561172	-0.113545
ZNF33B	-0.596095	0.596095	6.55925	-5.29723	2.59e-05	0.00102928	2.63325
TMEM184B	0.596013	0.596013	8.55003	4.25206	0.000327109	0.0045609	0.193381
BIVM	0.595931	0.595931	5.7409	3.25617	0.00362503	0.022158	-2.09273
SH2D7	-0.595764	0.595764	5.46247	-3.11694	0.00502961	0.0276182	-2.39955
MRPL35	-0.595669	0.595669	8.74053	-4.62201	0.000132626	0.00264284	1.06006
ETHE1	-0.595567	0.595567	10.4136	-3.4004	0.00257374	0.0176171	-1.77035
MASP1	0.595129	0.595129	5.44906	2.76311	0.0113573	0.0480359	-3.15515
SPART	0.594968	0.594968	5.77056	2.74758	0.0117628	0.0492101	-3.18741
RNF24	0.594471	0.594471	7.1576	3.35907	0.00284004	0.0187522	-1.86317
SLC7A8	0.594402	0.594402	8.78478	4.80802	8.43e-05	0.00203058	1.49547
ZNF789	-0.594298	0.594298	6.54428	-5.30683	2.53e-05	0.00101438	2.65544
CYP27A1	-0.594182	0.594182	7.48831	-2.5567	0.0180008	0.0658331	-3.57633
ZNF320	-0.594101	0.594101	6.00336	-3.82653	0.000922298	0.00878093	-0.797244
SIGLEC14	0.594004	0.594004	6.03289	2.57474	0.0172994	0.0640063	-3.5402
POLR2H	-0.593794	0.593794	9.91673	-6.89236	6.45e-07	0.000151423	6.18219
TPM2	0.593746	0.593746	7.53471	2.33146	0.0293071	0.0926026	-4.01576
DEPDC7	-0.593655	0.593655	5.94148	-3.05048	0.00587318	0.0306521	-2.54427
PRSS22	0.593171	0.593171	6.62176	4.6919	0.000111867	0.00240731	1.22375
HSPA4L	0.593127	0.593127	6.16662	2.45559	0.0224508	0.0768235	-3.7764
ASTE1	-0.592897	0.592897	6.23864	-3.87936	0.000811263	0.00809213	-0.675005
TLDC2	-0.592612	0.592612	7.94859	-4.40222	0.000226714	0.00366534	0.544997
ABCC1	0.592596	0.592596	8.03025	2.34954	0.0282012	0.0898805	-3.98136
TCEA3	-0.592425	0.592425	9.09848	-3.52481	0.00191106	0.0145629	-1.48907
CTSV	-0.592363	0.592363	5.2779	-2.94976	0.00741641	0.0361258	-2.76129
ATP1B3	-0.592304	0.592304	9.60415	-5.78721	8.08e-06	0.000521502	3.75448
COX5B	-0.59223	0.59223	10.3518	-5.64048	1.14e-05	0.000633701	3.42111
OAS1	-0.592098	0.592098	9.72484	-3.02805	0.00618755	0.0318258	-2.59286
AFF3	0.591946	0.591946	5.98125	2.44125	0.0231593	0.0785228	-3.80442
HVCN1	0.591939	0.591939	6.29533	2.21054	0.037791	0.110886	-4.24181
PTPRM	0.591907	0.591907	7.10236	2.95018	0.00740923	0.0361001	-2.7604
CNNM2	-0.591808	0.591808	8.08466	-2.42487	0.0239934	0.0804087	-3.83629
PTGIS	0.591745	0.591745	6.22549	2.41528	0.0244947	0.0814805	-3.85491
ZNF217	-0.591737	0.591737	8.78747	-5.69269	1.01e-05	0.000582064	3.53999
HIF1A	0.591715	0.591715	10.25	2.4896	0.0208508	0.0729915	-3.7096
SGK1	-0.591598	0.591598	7.46612	-2.43414	0.023518	0.0793092	-3.81827
KLRC4-KLRK1	-0.591591	0.591591	4.64971	-2.10014	0.0474269	0.129911	-4.44156
CYSLTR1	0.591467	0.591467	6.07569	1.91061	0.0691989	0.169963	-4.7684
EXOC6B	-0.591343	0.591343	8.55406	-4.79656	8.67e-05	0.00205899	1.46868
TLR1	0.591321	0.591321	5.63987	2.18091	0.0401852	0.116097	-4.29605
OSBPL8	0.591314	0.591314	7.78479	3.63848	0.00145375	0.0120304	-1.22987
ZNF823	-0.590932	0.590932	6.46795	-5.2932	2.61e-05	0.00103706	2.62396
LLGL2	-0.590797	0.590797	9.21357	-4.8385	7.83e-05	0.00196083	1.56672
RAB3D	0.590794	0.590794	7.64044	4.59794	0.000140637	0.00274351	1.00368
TMEM38B	-0.59077	0.59077	7.11871	-3.34276	0.00295238	0.0192995	-1.89971
PDHA1	-0.590657	0.590657	9.38878	-4.58991	0.000143416	0.00276856	0.984867
CD83	0.590619	0.590619	6.40268	2.19953	0.0386656	0.112691	-4.26203
KLF7	0.59061	0.59061	7.48371	2.21051	0.0377932	0.110886	-4.24186
ATP23	-0.590197	0.590197	7.5992	-4.31127	0.00028308	0.00420241	0.331972
EFCAB5	-0.590088	0.590088	4.60836	-3.9765	0.000640544	0.00700807	-0.449561
SLC26A6	-0.590083	0.590083	8.46663	-4.60245	0.000139098	0.00271926	1.01425
EMCN	0.589183	0.589183	6.15193	2.58914	0.0167577	0.0625792	-3.51124
CHST3	0.58911	0.58911	6.38788	4.45705	0.000198315	0.00336796	0.673481
ZNF675	-0.589008	0.589008	7.21118	-4.47413	0.000190218	0.0032747	0.713514
RAB9A	-0.588913	0.588913	8.11821	-5.79442	7.94e-06	0.000518221	3.7708
SCARNA5	0.588837	0.588837	8.34147	2.8043	0.0103455	0.0450921	-3.06923
CDH17	-0.588725	0.588725	11.7962	-5.03034	4.92e-05	0.00147293	2.01424
GPR137B	0.588681	0.588681	8.26335	3.12172	0.0049737	0.0274335	-2.3891
STX19	-0.588366	0.588366	7.66985	-2.76316	0.011356	0.0480359	-3.15505
ACACB	-0.588357	0.588357	7.28225	-4.2103	0.000362215	0.00487027	0.0957053
CXCL17	0.587884	0.587884	5.62104	2.83955	0.0095482	0.0428142	-2.99523
FKBP11	0.587773	0.587773	7.12312	2.63986	0.0149745	0.0580235	-3.40862
ETFA	-0.587689	0.587689	9.51063	-5.06916	4.48e-05	0.00138006	2.10456
NUP210	0.587443	0.587443	7.52677	2.49537	0.02059	0.0723355	-3.69821
ENPP3	-0.587363	0.587363	7.88928	-3.94449	0.000692455	0.00734848	-0.523953
VILL	-0.587195	0.587195	8.49502	-4.29042	0.000297863	0.0043093	0.283161
PALS2	0.586738	0.586738	6.34034	3.34759	0.00291863	0.0191304	-1.88888
CSRP2	0.58655	0.58655	7.38348	4.72505	0.000103195	0.00229672	1.30137
GNAI1	-0.585938	0.585938	7.00261	-3.85412	0.000862551	0.00841613	-0.733436
DNAJB5	0.585792	0.585792	6.59731	3.87506	0.000819776	0.00815102	-0.684956
ADCK5	-0.585694	0.585694	7.30619	-8.08827	4.99e-08	3.92e-05	8.61644
CSTF2	-0.585688	0.585688	7.21092	-5.92148	5.9e-06	0.000445035	4.05749
SMOX	0.585541	0.585541	6.40632	3.08926	0.00536575	0.0287766	-2.45998
MAFF	0.58526	0.58526	6.47391	5.12963	3.87e-05	0.00127837	2.24509
PDIA4	0.584645	0.584645	9.98722	3.35376	0.00287617	0.0189245	-1.87508
MPC1	-0.584485	0.584485	9.82006	-5.90888	6.07e-06	0.000452612	4.02915
CDK20	-0.584241	0.584241	5.98603	-3.59341	0.00162054	0.0129933	-1.33289
CASP6	-0.583964	0.583964	7.66002	-4.63877	0.000127318	0.00258063	1.09933
PRXL2C	0.583797	0.583797	6.87529	3.00535	0.00652206	0.0330149	-2.64187
APOBEC3C	0.583467	0.583467	8.27918	3.47269	0.00216543	0.0158097	-1.60725
ATP8B2	0.583296	0.583296	6.80657	3.4202	0.00245495	0.0170958	-1.72577
TMEM204	0.583107	0.583107	7.55447	3.76654	0.00106671	0.00978993	-0.935722
SMCHD1	-0.582896	0.582896	8.82996	-6.09374	3.95e-06	0.000363204	4.44324
NAT1	-0.582789	0.582789	6.31365	-5.03534	4.86e-05	0.00146407	2.02587
RAB34	0.58264	0.58264	6.41362	2.99528	0.00667595	0.0335701	-2.66356
IFT88	-0.582605	0.582605	5.84418	-6.03945	4.48e-06	0.000391002	4.32205
OSBPL1A	-0.582563	0.582563	7.10083	-4.31926	0.000277611	0.00415667	0.35068
SRM	0.582517	0.582517	9.15497	2.84038	0.00953024	0.0427545	-2.99349
RELL1	-0.582461	0.582461	8.72992	-3.97886	0.000636885	0.00698425	-0.444091
SLC17A8	-0.582224	0.582224	5.03414	-3.76357	0.0010744	0.00983657	-0.942558
GPR39	-0.582198	0.582198	8.16791	-3.29187	0.00333137	0.0208914	-2.01335
GPX2	0.581909	0.581909	11.4814	4.67914	0.000115394	0.00243829	1.1939
NKG7	0.581493	0.581493	7.30132	3.91523	0.00074353	0.00771397	-0.59186
SPAG9	-0.581254	0.581254	8.61255	-7.60509	1.37e-07	6.98e-05	7.65849
FCGRT	-0.580258	0.580258	9.07833	-2.90775	0.00816895	0.0385522	-2.85092
AFG3L2	-0.580029	0.580029	8.40012	-4.72662	0.000102801	0.0022927	1.30505
BICC1	0.579907	0.579907	5.78282	2.45061	0.0226943	0.0774178	-3.78613
GRTP1	-0.579704	0.579704	8.05031	-5.38783	2.08e-05	0.000904548	2.84221
DOC2B	0.579587	0.579587	7.22908	2.91362	0.00805953	0.038231	-2.83842
PAPPA	0.579532	0.579532	5.79235	2.36387	0.0273516	0.088174	-3.95397
ACOT13	-0.579438	0.579438	10.0336	-5.12282	3.94e-05	0.00128825	2.22928
PLOD2	-0.579354	0.579354	9.30671	-2.53545	0.0188615	0.0681275	-3.61875
C5orf52	-0.578916	0.578916	5.71531	-2.7426	0.0118956	0.049524	-3.19773
SNORD116-15	0.577275	0.577275	12.24	3.53766	0.00185303	0.0142461	-1.45988
DEFB1	-0.577272	0.577272	4.8345	-3.46598	0.00220045	0.0159719	-1.62241
ANKRD9	-0.576967	0.576967	7.88751	-4.04487	0.000542283	0.00627948	-0.29046
TGFBR3	0.576712	0.576712	6.54485	2.40841	0.0248599	0.0823176	-3.86822
LILRB4	0.576674	0.576674	7.09745	1.68884	0.105402	0.227728	-5.12253
STRIP2	0.576465	0.576465	5.28225	1.94759	0.0643628	0.161386	-4.70631
MUC4	0.576462	0.576462	9.66177	2.52303	0.019382	0.0695149	-3.64344
SAMSN1	0.576385	0.576385	5.1131	2.14704	0.0430909	0.121752	-4.3575
ARHGAP44	-0.576287	0.576287	8.20236	-2.61947	0.0156689	0.059744	-3.45
DLL4	0.576231	0.576231	7.59248	3.82944	0.000915812	0.0087333	-0.790523
LRRC32	0.576223	0.576223	7.04409	3.25674	0.00362017	0.0221571	-2.09147
EPB41L5	-0.576204	0.576204	7.42037	-4.56925	0.000150827	0.00284888	0.936444
ANKRD44	0.575917	0.575917	6.91914	2.14143	0.0435897	0.122643	-4.36761
CHMP5	-0.575847	0.575847	8.70973	-5.15204	3.67e-05	0.00125169	2.2971
MLLT11	0.575636	0.575636	6.0401	3.66166	0.00137466	0.0116205	-1.17678
FCN1	0.57509	0.57509	6.51878	3.10786	0.00513759	0.0280396	-2.41939
RNF128	-0.574911	0.574911	8.11864	-3.65153	0.0014087	0.0118166	-1.2
RIPOR1	0.57479	0.57479	6.96967	3.23832	0.00378122	0.0227513	-2.13233
MST1	-0.574785	0.574785	5.80012	-4.57595	0.000148382	0.00282253	0.952147
STPG1	-0.574429	0.574429	7.01946	-3.80211	0.000978595	0.00917786	-0.853667
NFIB	0.57432	0.57432	8.86569	5.21807	3.13e-05	0.0011456	2.45017
LIMD1-AS1	0.574205	0.574205	4.87234	2.98627	0.00681665	0.034053	-2.68296
ZSCAN16	-0.574005	0.574005	5.7109	-4.95568	5.9e-05	0.00165126	1.84027
PCDH20	-0.57399	0.57399	6.82507	-2.07625	0.049783	0.134469	-4.4839
SOS2	-0.573825	0.573825	9.54231	-6.03524	4.52e-06	0.000393028	4.31263
BMP5	-0.57363	0.57363	6.23082	-2.51969	0.0195246	0.069822	-3.65009
ENOSF1	-0.573573	0.573573	6.98719	-4.87016	7.25e-05	0.00185773	1.64069
HEBP1	-0.573513	0.573513	8.08528	-2.9189	0.00796225	0.0378936	-2.82717
PAPLN	0.573271	0.573271	6.57988	3.79258	0.00100148	0.00934136	-0.875673
ZNF558	-0.573201	0.573201	6.11646	-6.22143	2.94e-06	0.000316815	4.72687
DDT	-0.57302	0.57302	9.91378	-4.95171	5.95e-05	0.00165979	1.83103
TYRO3	0.57295	0.57295	6.1184	6.36809	2.1e-06	0.000260368	5.05012
SLC41A2	-0.572243	0.572243	9.58865	-4.32606	0.000273039	0.00411764	0.366607
NT5DC2	0.571957	0.571957	7.7977	2.51114	0.019893	0.0706088	-3.66703
THBD	0.571928	0.571928	6.76254	3.37314	0.00274653	0.0183794	-1.83162
GATM	-0.571901	0.571901	7.71606	-2.68478	0.0135458	0.054123	-3.31691
RASGRP3	0.5718	0.5718	6.02145	1.61385	0.12084	0.250932	-5.23479
TIE1	0.57129	0.57129	6.08859	4.45047	0.000201524	0.0034071	0.658068
PSMB9	0.571079	0.571079	8.14049	2.3508	0.0281251	0.0897288	-3.97894
DECR1	-0.570927	0.570927	8.0122	-5.31526	2.48e-05	0.00100482	2.67489
GPAT3	-0.57092	0.57092	8.16932	-3.64116	0.00144438	0.0119684	-1.22374
PDCD1LG2	0.570851	0.570851	6.17615	1.64	0.115254	0.24289	-5.19609
BTBD8	-0.570734	0.570734	6.04175	-3.89026	0.000790064	0.00797816	-0.649757
CALD1	0.570718	0.570718	7.8404	2.71537	0.0126475	0.0515322	-3.254
TMOD1	0.570433	0.570433	6.68959	2.90306	0.00825726	0.038769	-2.86088
LUC7L	-0.570415	0.570415	7.32081	-6.28594	2.54e-06	0.000296742	4.86939
CEBPD	0.57041	0.57041	8.76744	3.97594	0.000641421	0.00701139	-0.450867
WNT5A	0.57023	0.57023	5.84616	2.08509	0.0488984	0.132689	-4.46826
CD28	0.570055	0.570055	5.62777	1.89665	0.0711057	0.173247	-4.79162
SLITRK6	-0.569748	0.569748	7.26827	-2.05737	0.0517186	0.137961	-4.51714
ANK3	-0.569343	0.569343	7.21986	-3.16853	0.00445659	0.0254564	-2.2864
CDC42EP1	0.569279	0.569279	7.97744	5.4654	1.73e-05	0.000820024	3.02058
HCLS1	0.569259	0.569259	6.74942	1.9346	0.066026	0.16442	-4.72821
MIR200C	-0.569137	0.569137	6.67785	-2.56049	0.0178514	0.0654193	-3.56876
SUN1	-0.569019	0.569019	8.37167	-6.16096	3.38e-06	0.000338988	4.59281
GALNT2	0.568637	0.568637	8.70491	4.13589	0.000434344	0.00546011	-0.0781719
LRRC75A	-0.568542	0.568542	9.06273	-3.55734	0.00176743	0.0138133	-1.4151
SNORD78	-0.568447	0.568447	6.22141	-3.19877	0.0041507	0.0242169	-2.21978
GYPC	0.567913	0.567913	6.98415	2.99043	0.00675143	0.0338218	-2.67402
BNIP5	-0.567812	0.567812	6.82192	-3.17955	0.00434271	0.0249698	-2.26215
XKR9	0.567785	0.567785	4.29869	3.85978	0.000850783	0.00834015	-0.720344
CAPN2	-0.566557	0.566557	10.4201	-5.31369	2.49e-05	0.00100644	2.67126
EPB41L4B	-0.566532	0.566532	8.10511	-3.87408	0.000821748	0.00815303	-0.687246
MT1L	-0.566455	0.566455	9.0866	-2.56449	0.0176949	0.0650227	-3.56075
VDR	-0.566452	0.566452	9.37098	-3.95113	0.000681345	0.0072812	-0.508516
RHOB	0.566429	0.566429	8.49409	4.19757	0.000373653	0.00497438	0.0659272
RAD52	-0.566175	0.566175	7.16837	-6.97391	5.38e-07	0.000142878	6.35485
LMCD1	0.565949	0.565949	6.91235	5.44689	1.81e-05	0.000840136	2.97807
EIF4E3	-0.565562	0.565562	8.91016	-5.42981	1.88e-05	0.000870758	2.93881
ARL4C	0.565374	0.565374	6.7318	3.22671	0.0038862	0.0231758	-2.15803
CSAD	-0.565362	0.565362	6.61105	-4.9839	5.51e-05	0.00157019	1.90608
AGPAT2	-0.56536	0.56536	9.27407	-4.65949	0.000121052	0.00251316	1.14786
LSMEM1	-0.565328	0.565328	4.63402	-4.29581	0.000293972	0.00427266	0.295769
CNN1	0.565298	0.565298	7.54814	1.58916	0.12632	0.258635	-5.27087
CACNA2D1	0.565255	0.565255	5.6802	3.39473	0.00260878	0.0177452	-1.78311
OSM	0.564434	0.564434	5.71052	2.1432	0.043432	0.122368	-4.36443
SNORA65	0.563832	0.563832	5.82524	4.8021	8.56e-05	0.00204433	1.48164
NAALADL2	-0.56347	0.56347	7.02907	-2.81747	0.0100404	0.0442534	-3.04162
BVES	0.563107	0.563107	6.11597	2.82215	0.0099341	0.0439389	-3.0318
SEMA3A	0.563001	0.563001	6.24145	2.91303	0.00807042	0.0382409	-2.83968
GCSAM	0.562818	0.562818	6.25502	1.96852	0.0617588	0.156649	-4.67078
RFTN2	0.56271	0.56271	5.80008	2.64063	0.014949	0.0579833	-3.40706
PTPN3	-0.56269	0.56269	7.91309	-4.77091	9.23e-05	0.00215291	1.40869
SPRYD7	-0.562551	0.562551	7.86474	-5.39636	2.04e-05	0.000904548	2.86187
GUCY2C	-0.56233	0.56233	8.5174	-3.29263	0.0033254	0.0208679	-2.01166
TNS4	0.562122	0.562122	7.8258	1.53699	0.138582	0.277444	-5.34568
GLT8D2	0.562033	0.562033	6.63596	2.0117	0.0566811	0.147358	-4.59668
CSGALNACT1	0.562008	0.562008	5.17843	2.78833	0.0107273	0.0462132	-3.10262
STAG3L4	-0.561738	0.561738	7.04777	-3.91023	0.000752628	0.00776137	-0.60346
FNDC1	0.561587	0.561587	5.88305	3.12865	0.00489359	0.0271081	-2.37392
NMT2	-0.561422	0.561422	7.4277	-4.39001	0.000233574	0.00372748	0.516386
SH3BGRL2	-0.561414	0.561414	10.0687	-3.39397	0.00261352	0.0177669	-1.78482
SELPLG	0.561228	0.561228	7.85256	1.93523	0.0659444	0.16426	-4.72715
UNC13D	0.560863	0.560863	7.25363	2.88915	0.0085249	0.0396797	-2.89042
CAP2	0.560718	0.560718	6.30485	2.3598	0.0275907	0.0886544	-3.96176
CDH6	0.560347	0.560347	5.5105	3.10826	0.00513278	0.0280296	-2.41852
MFGE8	0.55987	0.55987	8.09837	2.22229	0.0368777	0.108894	-4.22017
FHL1	0.559568	0.559568	7.7969	2.35378	0.0279474	0.0894004	-3.97327
XK	-0.559267	0.559267	8.58282	-3.42447	0.00243007	0.0169621	-1.71615
NXN	0.559171	0.559171	6.66029	3.89789	0.000775543	0.00790684	-0.632067
CLDN23	-0.559115	0.559115	8.27312	-4.16802	0.000401592	0.00518167	-0.00312606
NEU1	-0.558747	0.558747	8.67982	-3.98899	0.000621359	0.00687862	-0.420521
SLC6A7	-0.558739	0.558739	5.89526	-4.90823	6.61e-05	0.00175951	1.72958
SEMA6D	-0.558615	0.558615	8.22572	-3.22606	0.00389219	0.0232042	-2.15948
ACVR2A	-0.558575	0.558575	7.42398	-2.98789	0.00679123	0.0339489	-2.67948
ENAH	0.558438	0.558438	7.79388	4.30073	0.00029046	0.00424783	0.307294
PLEKHO1	0.558218	0.558218	6.44446	3.38475	0.00267161	0.0180188	-1.80555
ST6GALNAC6	0.558203	0.558203	10.0312	2.12066	0.045483	0.126442	-4.40492
IKBIP	0.558109	0.558109	5.52529	2.73996	0.0119667	0.049677	-3.2032
CYFIP2	0.557984	0.557984	7.89959	2.40091	0.025264	0.0833522	-3.88271
PAQR8	-0.557925	0.557925	9.24996	-4.5636	0.00015292	0.00286867	0.923197
HOMER1	0.557874	0.557874	4.90659	4.06049	0.000522019	0.00612739	-0.254054
ANXA1	0.55784	0.55784	10.0826	1.30293	0.206097	0.366418	-5.65595
OR2J3	-0.557388	0.557388	3.937	-3.19154	0.00422195	0.024466	-2.23573
MIGA2	-0.556877	0.556877	6.90121	-5.82329	7.42e-06	0.000497409	3.83608
CPEB4	0.55667	0.55667	7.90619	3.31176	0.00317789	0.0202523	-1.96899
SUOX	-0.556582	0.556582	7.2439	-3.72311	0.00118497	0.0104676	-1.03571
ITPRIP	0.55658	0.55658	6.55967	4.6982	0.000110162	0.00239106	1.23852
NUP188	0.556388	0.556388	7.88904	3.7114	0.00121902	0.0106932	-1.06264
FXYD3	-0.556345	0.556345	12.0908	-3.65066	0.00141165	0.0118166	-1.20198
USP45	-0.556279	0.556279	6.70714	-5.92484	5.85e-06	0.000445035	4.06506
LRRN1	0.556106	0.556106	4.95344	3.2789	0.00343531	0.0213523	-2.04223
SLC13A1	-0.555645	0.555645	4.28267	-3.83025	0.000914028	0.00872422	-0.788665
NOTCH3	0.555137	0.555137	7.09212	4.41607	0.000219173	0.0035858	0.577464
CCDC93	-0.554801	0.554801	7.85542	-5.21454	3.16e-05	0.00114867	2.442
EVI2A	0.554581	0.554581	6.08382	2.06232	0.0512044	0.137112	-4.50844
BCL6B	0.554249	0.554249	6.37308	4.61048	0.000136405	0.00269278	1.03305
RMRP	0.553944	0.553944	11.197	6.21477	2.99e-06	0.00031983	4.71212
PPM1A	-0.553909	0.553909	7.96294	-4.80855	8.42e-05	0.00203058	1.49672
SYDE1	0.553824	0.553824	6.26483	4.71079	0.000106839	0.00235145	1.26799
KLRC3	-0.553732	0.553732	4.36678	-2.81524	0.0100916	0.0444064	-3.04632
LRATD1	0.553701	0.553701	9.45796	4.07256	0.00050688	0.00601334	-0.225913
FAM167A	0.553698	0.553698	5.18118	6.00223	4.89e-06	0.000411148	4.23874
TACSTD2	0.553612	0.553612	5.48885	4.38646	0.000235604	0.00373225	0.50808
CETN3	-0.55361	0.55361	5.28558	-5.47533	1.69e-05	0.000808184	3.04337
GZMB	0.553585	0.553585	6.12798	3.19994	0.00413929	0.0241965	-2.2172
NEXN	0.553501	0.553501	5.77973	2.34178	0.0286712	0.0911172	-3.99615
HYOU1	0.55343	0.55343	9.20039	3.58253	0.00166355	0.0132319	-1.35771
KCTD12	0.552742	0.552742	8.894	4.13893	0.000431136	0.00544728	-0.0710772
CCL13	-0.552334	0.552334	5.54994	-3.19288	0.00420863	0.0244113	-2.23277
SESTD1	0.552275	0.552275	6.87658	2.94062	0.00757416	0.0365729	-2.78083
GRAMD2A	0.552203	0.552203	5.46802	3.32013	0.00311539	0.0199484	-1.9503
CENPV	-0.552137	0.552137	8.11933	-3.78888	0.00101048	0.00941601	-0.884192
MFSD9	-0.552127	0.552127	7.3716	-5.68416	1.03e-05	0.000590304	3.52058
AGTRAP	0.552062	0.552062	7.8958	4.32631	0.000272877	0.00411764	0.367176
ZDHHC6	-0.551959	0.551959	8.09365	-6.45139	1.74e-06	0.000239626	5.23248
LRG1	0.551823	0.551823	7.33164	4.23953	0.000337269	0.00465435	0.164072
KRT7	0.551638	0.551638	6.54684	3.49011	0.0020769	0.0154323	-1.56779
HS3ST3B1	0.551017	0.551017	6.19216	3.45447	0.00226191	0.0162374	-1.64844
HOOK2	-0.550896	0.550896	7.63786	-5.58905	1.29e-05	0.000688889	3.30375
MAP1B	0.550749	0.550749	6.67277	2.74318	0.0118801	0.0494853	-3.19653
LY9	0.550622	0.550622	6.39061	2.78848	0.0107237	0.0462132	-3.10231
IYD	-0.550603	0.550603	6.69924	-3.03381	0.00610524	0.0315574	-2.58038
JAZF1	0.550589	0.550589	6.41301	3.36917	0.00277258	0.0184804	-1.84052
TMEM144	-0.550588	0.550588	7.81269	-3.20963	0.00404588	0.0238489	-2.1958
DST	-0.550557	0.550557	8.16923	-3.42597	0.00242138	0.0169378	-1.71277
RNF157	-0.550513	0.550513	8.19036	-1.83415	0.0802202	0.188078	-4.89411
ITGB8	0.549906	0.549906	7.08072	2.89885	0.00833746	0.0390483	-2.86983
EFEMP1	0.549878	0.549878	7.29697	1.7248	0.0986131	0.217422	-5.06732
KLHDC2	-0.549549	0.549549	8.4039	-3.87341	0.00082308	0.00816135	-0.688791
CAMK2G	-0.549481	0.549481	8.50456	-6.53721	1.43e-06	0.000224555	5.41938
ABHD18	-0.549431	0.549431	7.90829	-7.16058	3.57e-07	0.00011488	6.74646
AFAP1L2	0.549245	0.549245	6.21432	4.79988	8.6e-05	0.00205074	1.47645
LDHB	0.548797	0.548797	8.73293	2.83199	0.00971402	0.0432906	-3.01113
FASN	0.548769	0.548769	7.89028	4.64996	0.000123894	0.00254415	1.12554
SLC9B1	-0.548695	0.548695	3.98038	-3.14343	0.00472706	0.0265423	-2.34154
GAPT	0.548439	0.548439	6.3246	1.3477	0.191495	0.348636	-5.5999
DHDDS	-0.548438	0.548438	9.41305	-5.8208	7.47e-06	0.000497409	3.83046
SNORD60	0.548364	0.548364	6.11712	2.03753	0.053825	0.142089	-4.55185
SLC6A9	-0.548301	0.548301	8.16404	-3.66841	0.00135246	0.0114921	-1.16132
DAO	-0.548187	0.548187	5.1171	-3.42244	0.0024419	0.0170363	-1.72074
WFS1	0.548006	0.548006	6.69318	4.248	0.000330371	0.0045928	0.183872
HTATIP2	-0.547796	0.547796	8.48525	-4.55046	0.000157896	0.00291814	0.892424
CXCL6	0.547618	0.547618	5.35695	2.93994	0.00758607	0.0366022	-2.78228
SNORD15A	0.547558	0.547558	6.84899	2.9197	0.00794777	0.0378629	-2.82548
MAP3K2	-0.547343	0.547343	8.52133	-6.42958	1.83e-06	0.000243086	5.18482
MKRN1	-0.547264	0.547264	9.80991	-4.91897	6.44e-05	0.00173276	1.75464
PPP1R3B	-0.54679	0.54679	7.10292	-2.96403	0.00717618	0.0352931	-2.73072
CERCAM	0.546719	0.546719	6.29374	3.37266	0.00274966	0.0183938	-1.83269
PRKD1	0.546503	0.546503	5.31358	3.97905	0.000636584	0.00698425	-0.44364
PHKA2	-0.546344	0.546344	7.23114	-4.69431	0.00011121	0.00239934	1.22942
TSPYL5	0.546273	0.546273	5.84003	2.63112	0.0152686	0.0587644	-3.42638
PRPF39	-0.546267	0.546267	6.4463	-4.71056	0.000106898	0.00235145	1.26745
CCNE2	-0.546107	0.546107	6.75371	-2.74818	0.0117467	0.0491535	-3.18615
ACOT8	-0.545945	0.545945	8.09039	-3.81261	0.000953979	0.00899623	-0.829409
RFK	-0.545757	0.545757	9.42849	-4.103	0.000470623	0.00576309	-0.154931
GCC2	-0.545705	0.545705	8.48759	-3.47523	0.00215227	0.0157339	-1.60149
SLC39A6	0.545151	0.545151	7.02148	2.96976	0.00708189	0.0349937	-2.71843
DNALI1	0.545135	0.545135	6.41378	4.14428	0.000425541	0.00539467	-0.0585759
SERPINE2	0.544995	0.544995	6.45885	1.88842	0.0722524	0.174978	-4.80527
ARRDC4	-0.544876	0.544876	8.76356	-3.7677	0.00106372	0.00977198	-0.93305
S100A7	0.544849	0.544849	5.48036	3.19666	0.00417143	0.0242628	-2.22445
HCN3	-0.544772	0.544772	6.93612	-6.05564	4.31e-06	0.000385492	4.35822
SYTL4	-0.544224	0.544224	6.90776	-3.87245	0.000825001	0.00816383	-0.691013
ZDBF2	0.543958	0.543958	4.92276	3.08158	0.00546272	0.0291798	-2.47669
DENND1B	-0.543496	0.543496	8.31091	-4.91937	6.44e-05	0.00173276	1.75558
IFT22	0.543383	0.543383	6.8719	5.29929	2.58e-05	0.00102636	2.63803
LMNTD2-AS1	-0.543341	0.543341	5.44897	-5.57831	1.32e-05	0.000700895	3.27923
IL17A	0.543305	0.543305	6.09009	4.10196	0.000471819	0.00576427	-0.157358
USH1C	-0.543186	0.543186	8.9453	-5.4906	1.63e-05	0.000796262	3.0784
GRINA	0.543114	0.543114	8.21097	3.31433	0.00315862	0.02015	-1.96327
LOC728024	-0.54287	0.54287	6.10717	-5.025	4.98e-05	0.00148338	2.0018
RABGGTB	-0.54285	0.54285	7.7123	-6.58632	1.28e-06	0.000219214	5.52591
SEC23A	-0.542555	0.542555	9.76695	-4.5131	0.000172964	0.00308179	0.80485
ZNF608	-0.542502	0.542502	7.32603	-4.78914	8.83e-05	0.00208334	1.45132
UGT8	-0.542472	0.542472	8.62177	-4.90047	6.74e-05	0.00177382	1.71147
LRP6	-0.542311	0.542311	8.02519	-3.64005	0.00144827	0.0119953	-1.22629
OR4K15	-0.542046	0.542046	4.30153	-4.7037	0.000108697	0.00237434	1.2514
PLEKHH1	-0.541808	0.541808	7.97058	-3.39694	0.00259505	0.0176923	-1.77813
NME5	0.541599	0.541599	4.39665	4.71055	0.000106901	0.00235145	1.26743
ABHD12B	-0.541382	0.541382	6.05667	-1.29067	0.210244	0.371862	-5.67102
IFRD1	-0.541334	0.541334	6.95962	-3.5387	0.00184841	0.0142222	-1.45752
NOX1	0.541079	0.541079	10.5522	4.69039	0.000112277	0.00241241	1.22023
HNRNPH3	-0.541034	0.541034	7.95148	-5.87383	6.59e-06	0.000469072	3.95018
SEZ6L2	0.541033	0.541033	7.08049	5.19925	3.27e-05	0.00116471	2.40657
NOSTRIN	-0.540903	0.540903	8.47733	-4.30458	0.000287744	0.00423257	0.316301
TPTEP1	-0.540893	0.540893	5.62544	-4.38764	0.000234929	0.00373225	0.510834
C11orf54	-0.540778	0.540778	8.76825	-2.52558	0.019274	0.0692199	-3.63838
MAPK6	-0.54002	0.54002	8.46217	-3.60135	0.00158986	0.0128188	-1.31476
CAPN6	0.539849	0.539849	6.89319	1.97176	0.0613642	0.156116	-4.66526
MS4A10	-0.539839	0.539839	5.29208	-2.20558	0.0381821	0.1118	-4.25091
CMTM3	0.539811	0.539811	7.52419	2.94797	0.00744693	0.0362279	-2.76511
ZNF385D	0.539684	0.539684	5.13028	3.32887	0.00305144	0.0196871	-1.93078
LRRC49	0.539286	0.539286	6.19534	3.54099	0.00183827	0.0141879	-1.45231
STEAP3	-0.539192	0.539192	7.5935	-4.31831	0.000278259	0.00416307	0.348443
CLSTN3	0.538989	0.538989	6.67429	3.33146	0.00303273	0.0196123	-1.92499
HCFC1	0.538827	0.538827	8.71664	4.91299	6.54e-05	0.00175304	1.74069
ZKSCAN1	-0.538787	0.538787	8.0484	-3.68182	0.00130934	0.0112808	-1.13055
ANTXR1	0.53873	0.53873	8.16747	2.46644	0.0219287	0.0754751	-3.75515
ENTPD3	0.538666	0.538666	5.45687	3.50117	0.00202259	0.0151181	-1.54273
ANGPTL4	0.538616	0.538616	6.44112	2.41315	0.0246074	0.0817544	-3.85904
CATSPER2	-0.538579	0.538579	5.55699	-4.16092	0.000408609	0.00525781	-0.0197089
HMGA2	-0.538246	0.538246	6.3603	-3.34099	0.0029648	0.0193322	-1.90366
CHPT1	-0.538011	0.538011	9.83793	-4.13771	0.000432412	0.0054532	-0.073906
KIFAP3	-0.537992	0.537992	8.42723	-3.78666	0.00101595	0.00945294	-0.889327
CD40	0.537924	0.537924	5.67802	3.06943	0.00561967	0.0297407	-2.50312
RNASE1	-0.537535	0.537535	9.99063	-3.51037	0.00197846	0.0148886	-1.52187
PRF1	0.5375	0.5375	6.57781	3.11129	0.00509648	0.0278798	-2.41189
ARHGAP30	0.536976	0.536976	6.42642	2.60754	0.0160891	0.0608296	-3.47414
RASIP1	0.536925	0.536925	6.10291	5.94156	5.63e-06	0.000443969	4.10264
PRKCZ	-0.536695	0.536695	8.03764	-7.15247	3.63e-07	0.00011488	6.72955
PLXNC1	0.536448	0.536448	7.56712	2.30007	0.031323	0.0969096	-4.07514
DLD	-0.536352	0.536352	9.20414	-5.81583	7.55e-06	0.000499714	3.81923
PANK3	-0.536338	0.536338	9.45253	-4.66642	0.000119026	0.00249029	1.1641
EFL1	-0.536265	0.536265	6.66071	-4.46523	0.000194394	0.00332222	0.692656
F3	0.536204	0.536204	7.37175	2.68638	0.0134971	0.0539857	-3.31361
PIWIL4	-0.536106	0.536106	6.68345	-2.86725	0.00896317	0.0410382	-2.9368
SLC44A1	-0.536073	0.536073	10.5892	-5.13586	3.81e-05	0.00127026	2.25955
AFAP1-AS1	0.535901	0.535901	5.38712	1.9896	0.0592314	0.152285	-4.63474
RAB13	0.535811	0.535811	8.36565	5.36805	2.18e-05	0.000932984	2.79665
NOL12	-0.535752	0.535752	7.22888	-9.95604	1.33e-09	8.37e-06	11.9946
TMEM80	-0.53565	0.53565	7.71892	-5.54915	1.42e-05	0.00072275	3.21254
RGS4	0.535557	0.535557	5.1914	2.82698	0.00982549	0.0436428	-3.02166
GRAP	0.535391	0.535391	6.91253	2.1631	0.0416901	0.119202	-4.32844
SASH3	0.535269	0.535269	6.82549	2.73137	0.0122004	0.0503535	-3.22097
EPB41L1	-0.535191	0.535191	7.04159	-4.2522	0.000326999	0.0045609	0.193704
DERL3	0.535014	0.535014	7.11497	1.97154	0.0613911	0.156116	-4.66564
CPE	0.535013	0.535013	6.99809	2.82574	0.00985339	0.0437153	-3.02428
COPZ2	0.534861	0.534861	6.35968	7.87196	7.81e-08	5.08e-05	8.19191
SNORD116-27	0.534843	0.534843	5.14078	2.46794	0.0218571	0.0752837	-3.7522
ASB13	-0.534484	0.534484	7.55179	-3.11695	0.00502948	0.0276182	-2.39952
SNX24	-0.533959	0.533959	6.27929	-4.61198	0.000135906	0.00269114	1.03657
IRAK2	0.533836	0.533836	6.28361	3.47779	0.00213912	0.0157097	-1.5957
TBC1D12	-0.533808	0.533808	7.84057	-5.14645	3.72e-05	0.00125174	2.28414
SMIM14	-0.53359	0.53359	9.68216	-3.2275	0.00387896	0.0231574	-2.15628
SNORD43	0.533525	0.533525	7.98084	3.03039	0.00615403	0.0317053	-2.5878
FAM20C	0.533441	0.533441	7.97828	2.9533	0.00735602	0.0359338	-2.7537
ALPK2	0.533213	0.533213	4.78701	2.20016	0.038615	0.112613	-4.26087
GARS1-DT	-0.5332	0.5332	5.94814	-4.0926	0.00048271	0.00584654	-0.179187
AOX1	0.533123	0.533123	4.87705	2.79293	0.010616	0.0459057	-3.09301
ITLN2	0.533058	0.533058	5.82425	1.32149	0.199943	0.35934	-5.63292
[truncated: 16,853 more rows]
